# Supplementary material for: A Dipteran’s Novel Sucker Punch: Evolution of Arthropod Atypical Venom with a Neurotoxic Component in Robber Flies (Asilidae, Diptera)
Source: MDPI journal article supplement (doi:10.3390/toxins10010029), 2018-01-05
Supplement: s1 [file s1]

| Protein Class         | Contig ID                                                                                                                                                                                                                                                                                                                                                                                                                                                                                                                                                                                                                                                                                                                                                                                                                                                                                                                                                                                                                                                                                                                                                                                                                                                                                                                                                                                                                                                                                                                                                                                                                                                                                                                                                                                                           | TPM - Segemehl                                                                                                                                                                                                                                             | TPM - Kallisto                                                                                                                                                                                                                                     | Signal Peptide                                                                                                                                                                                    | false positive                                                                                                                           |
|-----------------------|---------------------------------------------------------------------------------------------------------------------------------------------------------------------------------------------------------------------------------------------------------------------------------------------------------------------------------------------------------------------------------------------------------------------------------------------------------------------------------------------------------------------------------------------------------------------------------------------------------------------------------------------------------------------------------------------------------------------------------------------------------------------------------------------------------------------------------------------------------------------------------------------------------------------------------------------------------------------------------------------------------------------------------------------------------------------------------------------------------------------------------------------------------------------------------------------------------------------------------------------------------------------------------------------------------------------------------------------------------------------------------------------------------------------------------------------------------------------------------------------------------------------------------------------------------------------------------------------------------------------------------------------------------------------------------------------------------------------------------------------------------------------------------------------------------------------|------------------------------------------------------------------------------------------------------------------------------------------------------------------------------------------------------------------------------------------------------------|----------------------------------------------------------------------------------------------------------------------------------------------------------------------------------------------------------------------------------------------------|---------------------------------------------------------------------------------------------------------------------------------------------------------------------------------------------------|------------------------------------------------------------------------------------------------------------------------------------------|
| Aegyptin              | no hit                                                                                                                                                                                                                                                                                                                                                                                                                                                                                                                                                                                                                                                                                                                                                                                                                                                                                                                                                                                                                                                                                                                                                                                                                                                                                                                                                                                                                                                                                                                                                                                                                                                                                                                                                                                                              | 0                                                                                                                                                                                                                                                          | 0                                                                                                                                                                                                                                                  | X                                                                                                                                                                                                 |                                                                                                                                          |
| Alpha-amylase         | Gene.160538::c53848_BT_Eu_ru_202_g1_i1::g.160538::m.160538                                                                                                                                                                                                                                                                                                                                                                                                                                                                                                                                                                                                                                                                                                                                                                                                                                                                                                                                                                                                                                                                                                                                                                                                                                                                                                                                                                                                                                                                                                                                                                                                                                                                                                                                                          | 28.06                                                                                                                                                                                                                                                      | 15.70                                                                                                                                                                                                                                              | NO                                                                                                                                                                                                |                                                                                                                                          |
| Anophelin             | no hit                                                                                                                                                                                                                                                                                                                                                                                                                                                                                                                                                                                                                                                                                                                                                                                                                                                                                                                                                                                                                                                                                                                                                                                                                                                                                                                                                                                                                                                                                                                                                                                                                                                                                                                                                                                                              | 0                                                                                                                                                                                                                                                          | 0                                                                                                                                                                                                                                                  | X                                                                                                                                                                                                 |                                                                                                                                          |
| Apyrase               | Gene.25975::c5296_BT_Eu_ru_202_g1_i1::g.25975::m.25975<br>Gene.21888::c4723_BT_Eu_ru_202_g1_i1::g.21888::m.21888<br>Gene.8970::c2180_BT_Eu_ru_202_g1_i2::g.8970::m.8970<br>Gene.8964::c2180_BT_Eu_ru_202_g1_i1::g.8964::m.8964<br>Gene.37803::c6641_BT_Eu_ru_202_g1_i1::g.37803::m.37803<br>Gene.7814::c1896_BT_Eu_ru_202_g1_i1::g.7814::m.7814<br>Gene.118845::c12003_BT_Eu_ru_202_g1_i1::g.118845::m.118845                                                                                                                                                                                                                                                                                                                                                                                                                                                                                                                                                                                                                                                                                                                                                                                                                                                                                                                                                                                                                                                                                                                                                                                                                                                                                                                                                                                                       | 34.75<br>5.87<br>4.11<br>4.26<br>1.80<br>1.59<br>1.16                                                                                                                                                                                                      | 18.79<br>2.99<br>2.65<br>0.00<br>0.85<br>2.22<br>0.83                                                                                                                                                                                              | YES<br>YES<br>NO<br>NO<br>NO<br>NO<br>NO                                                                                                                                                          | only body tissue<br>only body tissue<br>only body tissue<br>only body tissue<br>only body tissue<br>only body tissue<br>only body tissue |
| CAP                   | Gene.142078::c36088_BT_Eu_ru_202_g1_i1::g.142078::m.142078<br>Gene.29010::c5715_BT_Eu_ru_202_g1_i1::g.29010::m.29010<br>Gene.68277::c8738_BT_Eu_ru_202_g1_i1::g.68277::m.68277<br>Gene.68281::c8738_BT_Eu_ru_202_g1_i2::g.68281::m.68281<br>Gene.24328::c5068_BT_Eu_ru_202_g1_i1::g.24328::m.24328<br>Gene.86439::c9557_BT_Eu_ru_202_g1_i2::g.86439::m.86439<br>Gene.86434::c9557_BT_Eu_ru_202_g1_i1::g.86434::m.86434<br>Gene.86446::c9557_BT_Eu_ru_202_g1_i3::g.86446::m.86446<br>Gene.86452::c9557_BT_Eu_ru_202_g1_i4::g.86452::m.86452<br>Gene.17713::c4168_BT_Eu_ru_202_g1_i1::g.17713::m.17713<br>Gene.51425::c7670_BT_Eu_ru_202_g1_i1::g.51425::m.51425<br>Gene.61359::c8312_BT_Eu_ru_202_g1_i2::g.61359::m.61359<br>Gene.14160::c3373_BT_Eu_ru_202_g1_i1::g.14160::m.14160<br>Gene.164007::c55725_BT_Eu_ru_202_g1_i1::g.164007::m.164007<br>Gene.24682::c5122_BT_Eu_ru_202_g1_i3::g.24682::m.24682<br>Gene.41734::c6971_BT_Eu_ru_202_g1_i2::g.41734::m.41734<br>Gene.24677::c5122_BT_Eu_ru_202_g1_i2::g.24677::m.24677<br>Gene.41731::c6971_BT_Eu_ru_202_g1_i1::g.41731::m.41731<br>Gene.51430::c7670_BT_Eu_ru_202_g2_i1::g.51430::m.51430<br>Gene.61362::c8312_BT_Eu_ru_202_g1_i3::g.61362::m.61362<br>Gene.5269::c1271_BT_Eu_ru_202_g1_i1::g.5269::m.5269<br>Gene.16488::c3975_BT_Eu_ru_202_g1_i1::g.16488::m.16488<br>Gene.1341::c294_BT_Eu_ru_202_g1_i1::g.1341::m.1341<br>Gene.6394::c1542_BT_Eu_ru_202_g1_i1::g.6394::m.6394<br>Gene.144484::c37151_BT_Eu_ru_202_g1_i1::g.144484::m.144484<br>Gene.18178::c4228_BT_Eu_ru_202_g1_i2::g.18178::m.18178<br>Gene.137298::c30369_BT_Eu_ru_202_g1_i1::g.137298::m.137298<br>Gene.6399::c1542_BT_Eu_ru_202_g1_i2::g.6399::m.6399<br>Gene.155148::c47202_BT_Eu_ru_202_g1_i1::g.155148::m.155148<br>Gene.131222::c24156_BT_Eu_ru_202_g1_i1::g.131222::m.131222 | 123.82<br>46.38<br>25.28<br>21.70<br>30.38<br>15.79<br>18.66<br>18.66<br>18.66<br>6.77<br>11.23<br>10.63<br>6.16<br>24.83<br>8.57<br>9.37<br>9.31<br>9.87<br>5.34<br>9.39<br>4.31<br>3.86<br>20.87<br>3.38<br>3.35<br>1.79<br>1.59<br>2.78<br>1.21<br>4.52 | 99.62<br>30.19<br>14.40<br>2.98<br>23.13<br>8.95<br>2.72<br>2.72<br>2.72<br>4.15<br>7.79<br>8.17<br>4.72<br>20.83<br>3.22<br>4.10<br>4.87<br>6.39<br>3.82<br>2.50<br>3.27<br>3.01<br>82.26<br>1.99<br>2.71<br>1.37<br>1.05<br>1.30<br>0.82<br>8.29 | NO<br>YES<br>YES<br>YES<br>YES<br>YES<br>NO<br>NO<br>NO<br>NO<br>YES<br>NO<br>NO<br>NO<br>NO<br>NO<br>NO<br>NO<br>YES<br>YES<br>YES<br>YES<br>YES<br>NO<br>NO<br>NO<br>NO<br>NO<br>NO<br>NO<br>NO |                                                                                                                                          |
| Chitinase             | Gene.160944::c53991_BT_Eu_ru_202_g1_i1::g.160944::m.160944<br>Gene.239::c49_BT_Eu_ru_202_g1_i1::g.239::m.239<br>Gene.11803::c2822_BT_Eu_ru_202_g1_i1::g.11803::m.11803<br>Gene.11820::c2822_BT_Eu_ru_202_g1_i2::g.11820::m.11820<br>Gene.34358::c6288_BT_Eu_ru_202_g1_i3::g.34358::m.34358<br>Gene.34337::c6288_BT_Eu_ru_202_g1_i1::g.34337::m.34337<br>Gene.34347::c6288_BT_Eu_ru_202_g1_i2::g.34347::m.34347<br>Gene.36885::c6543_BT_Eu_ru_202_g1_i1::g.36885::m.36885<br>Gene.97115::c9977_BT_Eu_ru_202_g2_i2::g.97115::m.97115<br>Gene.97106::c9977_BT_Eu_ru_202_g2_i1::g.97106::m.97106<br>Gene.42077::c7007_BT_Eu_ru_202_g1_i1::g.42077::m.42077<br>Gene.54349::c7879_BT_Eu_ru_202_g1_i1::g.54349::m.54349<br>Gene.20380::c4520_BT_Eu_ru_202_g1_i1::g.20380::m.20380<br>Gene.20387::c4520_BT_Eu_ru_202_g1_i2::g.20387::m.20387<br>Gene.97101::c9977_BT_Eu_ru_202_g1_i1::g.97101::m.97101<br>Gene.137357::c30413_BT_Eu_ru_202_g1_i1::g.137357::m.137357<br>Gene.142979::c36402_BT_Eu_ru_202_g1_i1::g.142979::m.142979<br>Gene.121828::c14411_BT_Eu_ru_202_g1_i1::g.121828::m.121828<br>Gene.143585::c36683_BT_Eu_ru_202_g1_i1::g.143585::m.143585<br>Gene.120961::c13578_BT_Eu_ru_202_g1_i1::g.120961::m.120961<br>Gene.121952::c14548_BT_Eu_ru_202_g1_i1::g.121952::m.121952<br>Gene.124223::c17424_BT_Eu_ru_202_g1_i1::g.124223::m.124223<br>Gene.150616::c43630_BT_Eu_ru_202_g1_i1::g.150616::m.150616<br>Gene.128806::c21766_BT_Eu_ru_202_g1_i1::g.128806::m.128806<br>Gene.125377::c19352_BT_Eu_ru_202_g1_i1::g.125377::m.125377<br>Gene.167864::c59991_BT_Eu_ru_202_g1_i1::g.167864::m.167864                                                                                                                                                                                                            | 697.10<br>297.69<br>46.20<br>46.20<br>43.27<br>44.71<br>44.71<br>37.34<br>8.17<br>6.02<br>13.63<br>8.19<br>1.97<br>2.40<br>4.02<br>1.94<br>1.49<br>1.31<br>0.83<br>1.14<br>0.70<br>0.76<br>0.49<br>0.70<br>0.43<br>0.26                                    | 429.41<br>167.80<br>13.56<br>13.56<br>25.37<br>0.65<br>0.65<br>24.06<br>4.05<br>0.91<br>8.11<br>5.39<br>1.06<br>1.06<br>2.86<br>1.07<br>0.67<br>0.95<br>0.94<br>3.92<br>1.22<br>0.82<br>1.15<br>0.00<br>0.00<br>1.99                               | NO<br>YES<br>YES<br>YES<br>NO<br>NO<br>YES<br>YES<br>NO<br>NO<br>YES<br>NO<br>NO<br>NO<br>YES<br>NO<br>NO<br>NO<br>NO<br>NO<br>NO<br>NO<br>NO<br>NO<br>NO<br>NO<br>NO                             |                                                                                                                                          |
| Conoposin-like        | no hit                                                                                                                                                                                                                                                                                                                                                                                                                                                                                                                                                                                                                                                                                                                                                                                                                                                                                                                                                                                                                                                                                                                                                                                                                                                                                                                                                                                                                                                                                                                                                                                                                                                                                                                                                                                                              | 0                                                                                                                                                                                                                                                          | 0                                                                                                                                                                                                                                                  | X                                                                                                                                                                                                 |                                                                                                                                          |
| Csalpha/beta defensin | Gene.7845::c1908_BT_Eu_ru_202_g1_i1::g.7845::m.7845<br>Gene.23018::c4863_BT_Eu_ru_202_g1_i1::g.23018::m.23018<br>Gene.23019::c4863_BT_Eu_ru_202_g1_i1::g.23019::m.23019<br>Gene.165312::c56906_BT_Eu_ru_202_g1_i1::g.165312::m.165312<br>Gene.128161::c21304_BT_Eu_ru_202_g1_i1::g.128161::m.128161<br>Gene.129389::c22261_BT_Eu_ru_202_g1_i1::g.129389::m.129389<br>Gene.121567::c14148_BT_Eu_ru_202_g1_i1::g.121567::m.121567                                                                                                                                                                                                                                                                                                                                                                                                                                                                                                                                                                                                                                                                                                                                                                                                                                                                                                                                                                                                                                                                                                                                                                                                                                                                                                                                                                                     | 1890.74<br>97.37<br>10.13<br>9.13<br>1.63<br>1.03<br>0.84                                                                                                                                                                                                  | 4577.47<br>138.40<br>13.59<br>12.16<br>3.04<br>1.90<br>2.45                                                                                                                                                                                        | YES<br>YES<br>YES<br>NO<br>NO<br>NO<br>NO                                                                                                                                                         |                                                                                                                                          |
| Cystatin              | no hit                                                                                                                                                                                                                                                                                                                                                                                                                                                                                                                                                                                                                                                                                                                                                                                                                                                                                                                                                                                                                                                                                                                                                                                                                                                                                                                                                                                                                                                                                                                                                                                                                                                                                                                                                                                                              | 0                                                                                                                                                                                                                                                          | 0                                                                                                                                                                                                                                                  | X                                                                                                                                                                                                 |                                                                                                                                          |
| dICK's                | Gene.20180::c4485_BT_Eu_ru_202_g1_i2::g.20180::m.20180                                                                                                                                                                                                                                                                                                                                                                                                                                                                                                                                                                                                                                                                                                                                                                                                                                                                                                                                                                                                                                                                                                                                                                                                                                                                                                                                                                                                                                                                                                                                                                                                                                                                                                                                                              | 46.08                                                                                                                                                                                                                                                      | 40.85                                                                                                                                                                                                                                              | YES                                                                                                                                                                                               |                                                                                                                                          |
| Disintegrin-like      | no hit                                                                                                                                                                                                                                                                                                                                                                                                                                                                                                                                                                                                                                                                                                                                                                                                                                                                                                                                                                                                                                                                                                                                                                                                                                                                                                                                                                                                                                                                                                                                                                                                                                                                                                                                                                                                              | 0                                                                                                                                                                                                                                                          | 0                                                                                                                                                                                                                                                  | X                                                                                                                                                                                                 |                                                                                                                                          |
| Echotoxin-like        | no hit                                                                                                                                                                                                                                                                                                                                                                                                                                                                                                                                                                                                                                                                                                                                                                                                                                                                                                                                                                                                                                                                                                                                                                                                                                                                                                                                                                                                                                                                                                                                                                                                                                                                                                                                                                                                              | 0                                                                                                                                                                                                                                                          | 0                                                                                                                                                                                                                                                  | X                                                                                                                                                                                                 |                                                                                                                                          |
| Gigantoxin-like       | no hit                                                                                                                                                                                                                                                                                                                                                                                                                                                                                                                                                                                                                                                                                                                                                                                                                                                                                                                                                                                                                                                                                                                                                                                                                                                                                                                                                                                                                                                                                                                                                                                                                                                                                                                                                                                                              | 0                                                                                                                                                                                                                                                          | 0                                                                                                                                                                                                                                                  | X                                                                                                                                                                                                 |                                                                                                                                          |
| Hyaluronidase         | Gene.87474::c9599_BT_Eu_ru_202_g1_i1::g.87474::m.87474<br>Gene.132022::c25143_BT_Eu_ru_202_g1_i1::g.132022::m.132022                                                                                                                                                                                                                                                                                                                                                                                                                                                                                                                                                                                                                                                                                                                                                                                                                                                                                                                                                                                                                                                                                                                                                                                                                                                                                                                                                                                                                                                                                                                                                                                                                                                                                                | 5.49<br>1.41                                                                                                                                                                                                                                               | 3.11<br>1.87                                                                                                                                                                                                                                       | NO<br>NO                                                                                                                                                                                          |                                                                                                                                          |
| ICK's (Asiliidin1)    | Gene.161697::c54329_BT_Eu_ru_202_g1_i1::g.161697::m.161697<br>Gene.21715::c4697_BT_Eu_ru_202_g1_i1::g.21715::m.21715<br>Gene.93542::c9829_BT_Eu_ru_202_g1_i1::g.93542::m.93542                                                                                                                                                                                                                                                                                                                                                                                                                                                                                                                                                                                                                                                                                                                                                                                                                                                                                                                                                                                                                                                                                                                                                                                                                                                                                                                                                                                                                                                                                                                                                                                                                                      | 2444.80<br>1264.43<br>283.54                                                                                                                                                                                                                               | 1424.27<br>4732.57<br>561.23                                                                                                                                                                                                                       | NO<br>YES<br>YES                                                                                                                                                                                  |                                                                                                                                          |

|                      |                                                            |        |         |     |          |
|----------------------|------------------------------------------------------------|--------|---------|-----|----------|
|                      | Gene.152240::c45535_BT_Eu_ru_202_g1_i1::g.152240::m.152240 | 224.96 | 360.66  | NO  |          |
|                      | Gene.39881::c6812_BT_Eu_ru_202_g1_i2::g.39881::m.39881     | 121.48 | 187.70  | YES |          |
|                      | Gene.20180::c4485_BT_Eu_ru_202_g1_i2::g.20180::m.20180     | 46.08  | 40.85   | YES |          |
|                      | Gene.39880::c6812_BT_Eu_ru_202_g1_i1::g.39880::m.39880     | 107.00 | 153.16  | YES |          |
|                      | Gene.1638::c383_BT_Eu_ru_202_g1_i1::g.1638::m.1638         | 41.46  | 74.42   | YES |          |
|                      | Gene.122087::c14689_BT_Eu_ru_202_g1_i1::g.122087::m.122087 | 36.06  | 60.63   | NO  |          |
|                      | Gene.24204::c5054_BT_Eu_ru_202_g1_i1::g.24204::m.24204     | 31.67  | 74.15   | YES |          |
|                      | Gene.105934::c10281_BT_Eu_ru_202_g1_i4::g.105934::m.105934 | 18.94  | 46.23   | NO  |          |
|                      | Gene.131101::c24008_BT_Eu_ru_202_g1_i1::g.131101::m.131101 | 3.57   | 24.69   | NO  |          |
|                      | Gene.145664::c37908_BT_Eu_ru_202_g1_i1::g.145664::m.145664 | 2.15   | 6.30    | NO  |          |
|                      | Gene.133178::c26839_BT_Eu_ru_202_g1_i1::g.133178::m.133178 | 1.29   | 6.33    | NO  |          |
| Kazal                | Gene.18128::c4219_BT_Eu_ru_202_g1_i1::g.18128::m.18128     | 955.03 | 2059.49 | YES |          |
|                      | Gene.160344::c53759_BT_Eu_ru_202_g1_i1::g.160344::m.160344 | 151.82 | 151.40  | NO  |          |
|                      | Gene.73660::c9012_BT_Eu_ru_202_g1_i1::g.73660::m.73660     | 25.55  | 14.73   | NO  | excluded |
|                      | Gene.60::c14_BT_Eu_ru_202_g1_i2::g.60::m.60                | 43.69  | 20.87   | YES | excluded |
|                      | Gene.54::c14_BT_Eu_ru_202_g1_i1::g.54::m.54                | 42.02  | 6.10    | YES | excluded |
|                      | Gene.38877::c6728_BT_Eu_ru_202_g2_i1::g.38877::m.38877     | 9.21   | 5.29    | NO  | excluded |
|                      | Gene.119989::c12764_BT_Eu_ru_202_g1_i1::g.119989::m.119989 | 65.89  | 134.17  | NO  |          |
|                      | Gene.153754::c46278_BT_Eu_ru_202_g1_i1::g.153754::m.153754 | 4.44   | 2.64    | NO  |          |
|                      | Gene.77851::c9219_BT_Eu_ru_202_g1_i3::g.77851::m.77851     | 2.92   | 1.01    | NO  | excluded |
|                      | Gene.104004::c10221_BT_Eu_ru_202_g1_i2::g.104004::m.104004 | 9.76   | 4.66    | NO  |          |
|                      | Gene.104009::c10221_BT_Eu_ru_202_g1_i4::g.104009::m.104009 | 9.76   | 4.66    | NO  |          |
|                      | Gene.77840::c9219_BT_Eu_ru_202_g1_i2::g.77840::m.77840     | 3.00   | 0.88    | NO  | excluded |
|                      | Gene.104007::c10221_BT_Eu_ru_202_g1_i3::g.104007::m.104007 | 8.58   | 2.85    | NO  |          |
|                      | Gene.38488::c6702_BT_Eu_ru_202_g1_i1::g.38488::m.38488     | 4.06   | 2.14    | NO  |          |
|                      | Gene.38494::c6702_BT_Eu_ru_202_g1_i2::g.38494::m.38494     | 3.64   | 0.68    | NO  |          |
|                      | Gene.161553::c54262_BT_Eu_ru_202_g1_i1::g.161553::m.161553 | 1.33   | 1.12    | NO  | excluded |
|                      | Gene.51196::c7651_BT_Eu_ru_202_g1_i2::g.51196::m.51196     | 3.07   | 3.33    | NO  | excluded |
|                      | Gene.51194::c7651_BT_Eu_ru_202_g1_i1::g.51194::m.51194     | 3.21   | 0.00    | YES | excluded |
|                      | Gene.142522::c36239_BT_Eu_ru_202_g1_i1::g.142522::m.142522 | 3.72   | 9.25    | NO  |          |
|                      | Gene.119945::c12736_BT_Eu_ru_202_g1_i1::g.119945::m.119945 | 1.58   | 1.73    | NO  |          |
|                      | Gene.21472::c4674_BT_Eu_ru_202_g1_i1::g.21472::m.21472     | 2.13   | 5.42    | YES |          |
|                      | Gene.121155::c13763_BT_Eu_ru_202_g1_i1::g.121155::m.121155 | 1.54   | 4.42    | NO  |          |
|                      | Gene.131547::c24540_BT_Eu_ru_202_g1_i1::g.131547::m.131547 | 1.00   | 1.18    | NO  |          |
|                      | Gene.134151::c28539_BT_Eu_ru_202_g1_i1::g.134151::m.134151 | 0.96   | 4.31    | NO  |          |
|                      | Gene.132595::c25933_BT_Eu_ru_202_g1_i1::g.132595::m.132595 | 1.41   | 7.20    | NO  |          |
|                      | Gene.149143::c41436_BT_Eu_ru_202_g1_i1::g.149143::m.149143 | 0.70   | 1.31    | NO  |          |
|                      | Gene.166132::c57797_BT_Eu_ru_202_g1_i1::g.166132::m.166132 | 0.59   | 0.73    | NO  |          |
|                      | Gene.124573::c17955_BT_Eu_ru_202_g1_i1::g.124573::m.124573 | 0.41   | 0.97    | NO  |          |
|                      | Gene.130853::c23721_BT_Eu_ru_202_g1_i1::g.130853::m.130853 | 0.38   | 0.79    | NO  |          |
|                      | Gene.150391::c43220_BT_Eu_ru_202_g1_i1::g.150391::m.150391 | 0.24   | 0.00    | NO  |          |
| Kazal (vasotab-like) | Gene.27039::c5453_BT_Eu_ru_202_g1_i1::g.27039::m.27039     | 459.25 | 295.38  | YES |          |
|                      | Gene.27307::c5494_BT_Eu_ru_202_g1_i1::g.27307::m.27307     | 989.21 | 2483.01 | YES |          |
|                      | Gene.1621::c376_BT_Eu_ru_202_g1_i2::g.1621::m.1621         | 75.42  | 32.86   | YES | excluded |
|                      | Gene.1608::c376_BT_Eu_ru_202_g1_i1::g.1608::m.1608         | 73.78  | 9.96    | YES | excluded |
|                      | Gene.116928::c11046_BT_Eu_ru_202_g1_i1::g.116928::m.116928 | 268.79 | 221.45  | NO  |          |
|                      | Gene.119724::c12575_BT_Eu_ru_202_g1_i1::g.119724::m.119724 | 258.96 | 464.41  | NO  |          |
|                      | Gene.73991::c9035_BT_Eu_ru_202_g1_i1::g.73991::m.73991     | 105.07 | 80.74   | YES |          |
|                      | Gene.83158::c9419_BT_Eu_ru_202_g1_i1::g.83158::m.83158     | 19.53  | 3.93    | YES |          |
|                      | Gene.83168::c9419_BT_Eu_ru_202_g1_i3::g.83168::m.83168     | 17.10  | 5.88    | YES |          |
|                      | Gene.26194::c5324_BT_Eu_ru_202_g1_i1::g.26194::m.26194     | 20.40  | 18.32   | NO  |          |
|                      | Gene.127974::c21185_BT_Eu_ru_202_g1_i1::g.127974::m.127974 | 30.61  | 73.03   | NO  |          |
|                      | Gene.83162::c9419_BT_Eu_ru_202_g1_i2::g.83162::m.83162     | 19.50  | 6.46    | NO  |          |
|                      | Gene.1339::c293_BT_Eu_ru_202_g1_i1::g.1339::m.1339         | 3.67   | 4.55    | YES |          |
|                      | Gene.119945::c12736_BT_Eu_ru_202_g1_i1::g.119945::m.119945 | 1.58   | 1.73    | NO  |          |
|                      | Gene.131547::c24540_BT_Eu_ru_202_g1_i1::g.131547::m.131547 | 1.00   | 1.18    | NO  |          |
|                      | Gene.27331::c5499_BT_Eu_ru_202_g2_i1::g.27331::m.27331     | 0.90   | 1.86    | YES |          |
|                      | Gene.138131::c31103_BT_Eu_ru_202_g1_i1::g.138131::m.138131 | 0.74   | 1.85    | NO  |          |
| Kunitz               | Gene.100222::c10088_BT_Eu_ru_202_g1_i1::g.100222::m.100222 | 62.67  | 35.18   | NO  |          |
|                      | Gene.108787::c10380_BT_Eu_ru_202_g1_i1::g.108787::m.108787 | 16.83  | 8.72    | NO  |          |
|                      | Gene.108822::c10380_BT_Eu_ru_202_g1_i2::g.108822::m.108822 | 15.78  | 0.43    | NO  |          |
|                      | Gene.83719::c9444_BT_Eu_ru_202_g1_i2::g.83719::m.83719     | 23.11  | 12.70   | NO  | excluded |
|                      | Gene.83672::c9444_BT_Eu_ru_202_g1_i1::g.83672::m.83672     | 21.88  | 0.40    | NO  | excluded |
|                      | Gene.58792::c8135_BT_Eu_ru_202_g1_i3::g.58792::m.58792     | 19.81  | 10.23   | NO  |          |
|                      | Gene.58781::c8135_BT_Eu_ru_202_g1_i2::g.58781::m.58781     | 19.66  | 0.00    | NO  |          |
|                      | Gene.63943::c8462_BT_Eu_ru_202_g1_i3::g.63943::m.63943     | 4.51   | 2.18    | NO  |          |
|                      | Gene.63891::c8462_BT_Eu_ru_202_g1_i1::g.63891::m.63891     | 4.38   | 0.25    | NO  |          |
|                      | Gene.63918::c8462_BT_Eu_ru_202_g1_i2::g.63918::m.63918     | 4.46   | 0.00    | NO  |          |
|                      | Gene.143192::c36491_BT_Eu_ru_202_g1_i1::g.143192::m.143192 | 56.97  | 85.46   | NO  |          |
|                      | Gene.3414::c866_BT_Eu_ru_202_g1_i1::g.3414::m.3414         | 48.97  | 76.95   | YES |          |
|                      | Gene.145823::c38016_BT_Eu_ru_202_g1_i1::g.145823::m.145823 | 34.30  | 46.65   | NO  |          |
|                      | Gene.18876::c4298_BT_Eu_ru_202_g1_i1::g.18876::m.18876     | 15.10  | 10.96   | NO  |          |
|                      | Gene.156979::c48848_BT_Eu_ru_202_g1_i1::g.156979::m.156979 | 11.22  | 19.23   | NO  |          |
|                      | Gene.126709::c20527_BT_Eu_ru_202_g1_i1::g.126709::m.126709 | 4.72   | 5.29    | NO  |          |
|                      | Gene.7602::c1818_BT_Eu_ru_202_g1_i1::g.7602::m.7602        | 3.07   | 4.84    | YES |          |
|                      | Gene.152895::c45821_BT_Eu_ru_202_g1_i1::g.152895::m.152895 | 0.51   | 0.00    | NO  |          |
|                      | Gene.140458::c33756_BT_Eu_ru_202_g1_i1::g.140458::m.140458 | 0.57   | 2.61    | NO  |          |
|                      |                                                            |        |         |     |          |
| Lectin c-type        | Gene.23041::c4869_BT_Eu_ru_202_g1_i1::g.23041::m.23041     | 430.71 | 303.27  | YES |          |
|                      | Gene.52516::c7754_BT_Eu_ru_202_g1_i3::g.52516::m.52516     | 26.32  | 13.84   | YES |          |
|                      | Gene.32805::c6140_BT_Eu_ru_202_g1_i1::g.32805::m.32805     | 12.07  | 4.75    | NO  | excluded |
|                      | Gene.32820::c6140_BT_Eu_ru_202_g1_i2::g.32820::m.32820     | 12.02  | 1.20    | NO  | excluded |
|                      | Gene.10507::c2495_BT_Eu_ru_202_g1_i1::g.10507::m.10507     | 25.83  | 22.96   | YES |          |
|                      | Gene.22191::c4762_BT_Eu_ru_202_g1_i1::g.22191::m.22191     | 7.74   | 3.65    | NO  |          |
|                      | Gene.22194::c4762_BT_Eu_ru_202_g1_i2::g.22194::m.22194     | 7.72   | 1.05    | NO  |          |
|                      | Gene.145637::c37888_BT_Eu_ru_202_g1_i1::g.145637::m.145637 | 21.38  | 17.12   | NO  |          |
|                      | Gene.45117::c7223_BT_Eu_ru_202_g2_i1::g.45117::m.45117     | 7.03   | 3.94    | NO  | excluded |
|                      | Gene.15947::c3813_BT_Eu_ru_202_g1_i1::g.15947::m.15947     | 9.06   | 6.70    | YES |          |
|                      | Gene.15951::c3813_BT_Eu_ru_202_g1_i2::g.15951::m.15951     | 7.97   | 2.70    | YES |          |
|                      | Gene.127797::c21075_BT_Eu_ru_202_g1_i1::g.127797::m.127797 | 1.84   | 1.14    | NO  |          |
|                      | Gene.22361::c4783_BT_Eu_ru_202_g1_i1::g.22361::m.22361     | 1.31   | 0.73    | NO  | excluded |
|                      | Gene.165742::c57351_BT_Eu_ru_202_g1_i1::g.165742::m.165742 | 1.34   | 0.77    | NO  |          |
| Lipocalin calycins   | Gene.17947::c4193_BT_Eu_ru_202_g1_i1::g.17947::m.17947     | 261.36 | 212.66  | YES |          |
|                      | Gene.10611::c2536_BT_Eu_ru_202_g1_i1::g.10611::m.10611     | 177.93 | 122.10  | YES |          |
|                      | Gene.143062::c36440_BT_Eu_ru_202_g1_i1::g.143062::m.143062 | 11.78  | 10.54   | NO  |          |
|                      | Gene.1206::c260_BT_Eu_ru_202_g1_i1::g.1206::m.1206         | 1.75   | 1.68    | YES |          |
|                      | Gene.127831::c21094_BT_Eu_ru_202_g1_i1::g.127831::m.127831 | 1.55   | 1.08    | NO  |          |
| Maxadilan-like       | no hit                                                     | 0      | 0       | X   |          |
| MBF2-domain          | Gene.36405::c6479_BT_Eu_ru_202_g1_i1::g.36405::m.36405     | 944.88 | 980.39  | YES |          |
|                      | Gene.153899::c46349_BT_Eu_ru_202_g1_i1::g.153899::m.153899 | 474.26 | 528.63  | NO  |          |

|                            |                                                            |         |        |     |
|----------------------------|------------------------------------------------------------|---------|--------|-----|
|                            | Gene.134364::c28620_BT_Eu_ru_202_g1_i1::g.134364::m.134364 | 115.58  | 122.93 | NO  |
|                            | Gene.137891::c30881_BT_Eu_ru_202_g1_i1::g.137891::m.137891 | 61.64   | 54.13  | NO  |
|                            | Gene.127065::c20713_BT_Eu_ru_202_g1_i1::g.127065::m.127065 | 63.27   | 83.74  | NO  |
|                            | Gene.144921::c37410_BT_Eu_ru_202_g1_i1::g.144921::m.144921 | 33.10   | 49.49  | NO  |
|                            | Gene.155280::c47297_BT_Eu_ru_202_g1_i1::g.155280::m.155280 | 6.36    | 7.25   | NO  |
| Melittin-like              | no hit                                                     | 0       | 0      | X   |
| Natterin-like (Asilidin10) | Gene.31937::c6042_BT_Eu_ru_202_g1_i1::g.31937::m.31937     | 260.64  | 198.66 | NO  |
|                            | Gene.134183::c28558_BT_Eu_ru_202_g1_i1::g.134183::m.134183 | 116.57  | 80.13  | NO  |
|                            | Gene.48255::c7442_BT_Eu_ru_202_g1_i1::g.48255::m.48255     | 47.22   | 34.07  | NO  |
|                            | Gene.6341::c1532_BT_Eu_ru_202_g1_i2::g.6341::m.6341        | 22.58   | 5.83   | NO  |
|                            | Gene.6338::c1532_BT_Eu_ru_202_g1_i1::g.6338::m.6338        | 28.92   | 21.84  | NO  |
|                            | Gene.36870::c6540_BT_Eu_ru_202_g1_i2::g.36870::m.36870     | 3.13    | 2.83   | NO  |
| Neurokinin-like            | no hit                                                     | 0       | 0      | X   |
| Nitrophorin-like           | no hit                                                     | 0       | 0      | X   |
| Novel protein (Asilidin2)  | Gene.11205::c2697_BT_Eu_ru_202_g1_i1::g.11205::m.11205     | 155.89  | 101.16 | NO  |
|                            | Gene.58349::c8110_BT_Eu_ru_202_g1_i1::g.58349::m.58349     | 111.60  | 77.43  | YES |
|                            | Gene.50653::c7611_BT_Eu_ru_202_g1_i1::g.50653::m.50653     | 21.47   | 15.11  | YES |
|                            | Gene.64818::c8521_BT_Eu_ru_202_g1_i1::g.64818::m.64818     | 18.57   | 11.77  | YES |
|                            | Gene.11204::c2697_BT_Eu_ru_202_g1_i1::g.11204::m.11204     | 10.07   | 6.56   | YES |
|                            | Gene.101340::c10126_BT_Eu_ru_202_g1_i1::g.101340::m.101340 | 9.51    | 6.09   | NO  |
|                            | Gene.106804::c10309_BT_Eu_ru_202_g1_i1::g.106804::m.106804 | 4.42    | 2.87   | NO  |
|                            | Gene.81563::c9358_BT_Eu_ru_202_g1_i1::g.81563::m.81563     | 5.49    | 3.02   | YES |
|                            | Gene.127319::c20833_BT_Eu_ru_202_g1_i1::g.127319::m.127319 | 3.96    | 2.61   | NO  |
|                            | Gene.81448::c9352_BT_Eu_ru_202_g1_i1::g.81448::m.81448     | 3.38    | 2.15   | YES |
|                            | Gene.81459::c9352_BT_Eu_ru_202_g3_i2::g.81459::m.81459     | 3.08    | 1.52   | NO  |
|                            | Gene.83601::c9439_BT_Eu_ru_202_g1_i2::g.83601::m.83601     | 2.99    | 2.03   | YES |
|                            | Gene.83593::c9439_BT_Eu_ru_202_g1_i1::g.83593::m.83593     | 2.39    | 1.19   | YES |
|                            | Gene.6366::c1537_BT_Eu_ru_202_g1_i1::g.6366::m.6366        | 1.57    | 0.83   | NO  |
|                            | Gene.128156::c21301_BT_Eu_ru_202_g1_i1::g.128156::m.128156 | 1.82    | 1.10   | NO  |
| Novel protein (Asilidin3)  | Gene.141974::c36063_BT_Eu_ru_202_g1_i1::g.141974::m.141974 | 107.33  | 141.93 | NO  |
|                            | Gene.47305::c7377_BT_Eu_ru_202_g1_i1::g.47305::m.47305     | 8.46    | 7.37   | YES |
| Novel protein (Asilidin4)  | Gene.30032::c5847_BT_Eu_ru_202_g1_i1::g.30032::m.30032     | 2.58    | 5.68   | YES |
| Novel protein (Asilidin5)  | Gene.10676::c2552_BT_Eu_ru_202_g1_i1::g.10676::m.10676     | 1.56    | 1.32   | NO  |
| Novel protein (Asilidin6)  | no hit                                                     | 0       | 0      | X   |
| Novel protein (Asilidin7)  | no hit                                                     | 0       | 0      | X   |
| Peptidase M12              | Gene.6965::c1644_BT_Eu_ru_202_g1_i1::g.6965::m.6965        | 399.30  | 269.12 | YES |
|                            | Gene.99159::c10056_BT_Eu_ru_202_g1_i4::g.99159::m.99159    | 14.97   | 4.63   | NO  |
|                            | Gene.99111::c10056_BT_Eu_ru_202_g1_i1::g.99111::m.99111    | 14.46   | 1.83   | NO  |
|                            | Gene.100790::c10108_BT_Eu_ru_202_g1_i3::g.100790::m.100790 | 11.90   | 3.19   | NO  |
|                            | Gene.100773::c10108_BT_Eu_ru_202_g1_i2::g.100773::m.100773 | 12.13   | 3.42   | NO  |
|                            | Gene.92491::c9799_BT_Eu_ru_202_g1_i2::g.92491::m.92491     | 19.03   | 0.00   | NO  |
|                            | Gene.92552::c9799_BT_Eu_ru_202_g1_i8::g.92552::m.92552     | 19.03   | 0.00   | NO  |
|                            | Gene.92537::c9799_BT_Eu_ru_202_g1_i7::g.92537::m.92537     | 19.47   | 0.79   | YES |
|                            | Gene.92564::c9799_BT_Eu_ru_202_g1_i9::g.92564::m.92564     | 18.64   | 1.58   | NO  |
|                            | Gene.54391::c7885_BT_Eu_ru_202_g1_i1::g.54391::m.54391     | 12.12   | 6.59   | NO  |
|                            | Gene.90464::c9714_BT_Eu_ru_202_g1_i1::g.90464::m.90464     | 53.79   | 27.97  | NO  |
|                            | Gene.92509::c9799_BT_Eu_ru_202_g1_i4::g.92509::m.92509     | 21.04   | 3.89   | NO  |
|                            | Gene.92576::c9799_BT_Eu_ru_202_g1_i10::g.92576::m.92576    | 21.36   | 0.00   | NO  |
|                            | Gene.99131::c10056_BT_Eu_ru_202_g1_i2::g.99131::m.99131    | 11.80   | 0.00   | NO  |
|                            | Gene.105558::c10269_BT_Eu_ru_202_g2_i1::g.105558::m.105558 | 11.79   | 6.39   | NO  |
|                            | Gene.100759::c10108_BT_Eu_ru_202_g1_i1::g.100759::m.100759 | 10.79   | 0.57   | NO  |
|                            | Gene.92525::c9799_BT_Eu_ru_202_g1_i6::g.92525::m.92525     | 18.93   | 2.16   | NO  |
|                            | Gene.92478::c9799_BT_Eu_ru_202_g1_i1::g.92478::m.92478     | 19.12   | 1.88   | NO  |
|                            | Gene.92502::c9799_BT_Eu_ru_202_g1_i3::g.92502::m.92502     | 19.12   | 1.88   | NO  |
|                            | Gene.92477::c9799_BT_Eu_ru_202_g1_i1::g.92477::m.92477     | 17.00   | 1.51   | NO  |
|                            | Gene.92524::c9799_BT_Eu_ru_202_g1_i6::g.92524::m.92524     | 17.85   | 3.92   | NO  |
|                            | Gene.90467::c9714_BT_Eu_ru_202_g1_i2::g.90467::m.90467     | 46.12   | 0.00   | NO  |
|                            | Gene.90469::c9714_BT_Eu_ru_202_g1_i3::g.90469::m.90469     | 46.12   | 0.00   | NO  |
|                            | Gene.90472::c9714_BT_Eu_ru_202_g1_i4::g.90472::m.90472     | 45.77   | 10.02  | NO  |
|                            | Gene.63553::c8441_BT_Eu_ru_202_g1_i5::g.63553::m.63553     | 6.08    | 0.21   | NO  |
|                            | Gene.49148::c7523_BT_Eu_ru_202_g1_i1::g.49148::m.49148     | 3.84    | 2.09   | YES |
|                            | Gene.72647::c8958_BT_Eu_ru_202_g1_i1::g.72647::m.72647     | 5.10    | 2.72   | YES |
|                            | Gene.85558::c9516_BT_Eu_ru_202_g1_i1::g.85558::m.85558     | 3.48    | 1.83   | NO  |
|                            | Gene.63496::c8441_BT_Eu_ru_202_g1_i1::g.63496::m.63496     | 4.99    | 0.80   | NO  |
|                            | Gene.63512::c8441_BT_Eu_ru_202_g1_i2::g.63512::m.63512     | 4.99    | 0.80   | NO  |
|                            | Gene.63529::c8441_BT_Eu_ru_202_g1_i3::g.63529::m.63529     | 4.99    | 0.80   | NO  |
|                            | Gene.32210::c6072_BT_Eu_ru_202_g1_i1::g.32210::m.32210     | 3.26    | 18.63  | NO  |
|                            | Gene.149978::c42610_BT_Eu_ru_202_g1_i1::g.149978::m.149978 | 0.47    | 0.79   | NO  |
|                            | Gene.166082::c57729_BT_Eu_ru_202_g1_i1::g.166082::m.166082 | 0.47    | 0.00   | NO  |
|                            | Gene.156932::c48814_BT_Eu_ru_202_g1_i1::g.156932::m.156932 | 0.56    | 2.40   | NO  |
|                            | Gene.140944::c34478_BT_Eu_ru_202_g1_i1::g.140944::m.140944 | 0.38    | 1.75   | NO  |
| Peptidase M13              | Gene.86165::c9547_BT_Eu_ru_202_g1_i1::g.86165::m.86165     | 1731.75 | 995.14 | NO  |
|                            | Gene.86169::c9547_BT_Eu_ru_202_g2_i1::g.86169::m.86169     | 1035.26 | 980.11 | YES |
|                            | Gene.108607::c10374_BT_Eu_ru_202_g1_i1::g.108607::m.108607 | 108.97  | 62.31  | NO  |
|                            | Gene.142273::c36158_BT_Eu_ru_202_g1_i1::g.142273::m.142273 | 80.02   | 43.98  | NO  |
|                            | Gene.143124::c36469_BT_Eu_ru_202_g1_i1::g.143124::m.143124 | 59.71   | 34.31  | NO  |
|                            | Gene.126367::c20418_BT_Eu_ru_202_g1_i1::g.126367::m.126367 | 50.95   | 31.26  | NO  |
|                            | Gene.112876::c10484_BT_Eu_ru_202_g1_i1::g.112876::m.112876 | 35.52   | 19.39  | NO  |
|                            | Gene.42633::c7061_BT_Eu_ru_202_g1_i1::g.42633::m.42633     | 52.95   | 31.67  | NO  |
|                            | Gene.57632::c8072_BT_Eu_ru_202_g1_i1::g.57632::m.57632     | 41.87   | 26.46  | NO  |
|                            | Gene.33434::c6200_BT_Eu_ru_202_g1_i2::g.33434::m.33434     | 22.36   | 10.11  | NO  |
|                            | Gene.33423::c6200_BT_Eu_ru_202_g1_i1::g.33423::m.33423     | 21.64   | 2.92   | NO  |
|                            | Gene.134741::c28778_BT_Eu_ru_202_g1_i1::g.134741::m.134741 | 19.82   | 11.19  | NO  |
|                            | Gene.112740::c10480_BT_Eu_ru_202_g1_i1::g.112740::m.112740 | 19.95   | 11.26  | NO  |
|                            | Gene.37736::c6634_BT_Eu_ru_202_g1_i1::g.37736::m.37736     | 18.98   | 11.17  | YES |
|                            | Gene.87170::c9581_BT_Eu_ru_202_g1_i1::g.87170::m.87170     | 10.32   | 5.71   | YES |
|                            | Gene.24389::c5080_BT_Eu_ru_202_g1_i1::g.24389::m.24389     | 8.59    | 2.32   | NO  |
|                            | Gene.24395::c5080_BT_Eu_ru_202_g1_i2::g.24395::m.24395     | 8.59    | 2.32   | NO  |
|                            | Gene.143229::c36510_BT_Eu_ru_202_g1_i1::g.143229::m.143229 | 9.66    | 5.99   | NO  |

|               |                                                         |         |         |     |          |
|---------------|---------------------------------------------------------|---------|---------|-----|----------|
|               | Gene.22466:c4795_BT_Eu_ru_202_g1_i1:g.22466:m.22466     | 10.32   | 6.14    | NO  |          |
|               | Gene.151519:c45290_BT_Eu_ru_202_g1_i1:g.151519:m.151519 | 8.05    | 4.23    | NO  |          |
|               | Gene.16835:c4067_BT_Eu_ru_202_g1_i1:g.16835:m.16835     | 23.84   | 16.85   | YES |          |
|               | Gene.33309:c6191_BT_Eu_ru_202_g1_i1:g.33309:m.33309     | 5.67    | 3.29    | YES |          |
|               | Gene.14379:c3421_BT_Eu_ru_202_g1_i1:g.14379:m.14379     | 6.52    | 3.92    | NO  |          |
|               | Gene.24087:c5037_BT_Eu_ru_202_g1_i1:g.24087:m.24087     | 5.40    | 3.42    | YES |          |
|               | Gene.109792:c10403_BT_Eu_ru_202_g1_i1:g.109792:m.109792 | 4.05    | 2.47    | NO  |          |
|               | Gene.112741:c10480_BT_Eu_ru_202_g1_i1:g.112741:m.112741 | 22.64   | 26.56   | NO  |          |
|               | Gene.12313:c2910_BT_Eu_ru_202_g1_i2:g.12313:m.12313     | 3.10    | 1.68    | YES |          |
|               | Gene.5006:c1201_BT_Eu_ru_202_g1_i1:g.5006:m.5006        | 2.59    | 1.53    | NO  |          |
|               | Gene.109798:c10403_BT_Eu_ru_202_g2_i1:g.109798:m.109798 | 2.88    | 1.44    | NO  |          |
|               | Gene.142066:c36082_BT_Eu_ru_202_g1_i1:g.142066:m.142066 | 2.71    | 1.70    | NO  |          |
|               | Gene.117255:c11176_BT_Eu_ru_202_g1_i1:g.117255:m.117255 | 2.38    | 1.53    | NO  |          |
|               | Gene.20868:c4591_BT_Eu_ru_202_g1_i1:g.20868:m.20868     | 1.90    | 1.17    | NO  |          |
|               | Gene.4552:c1057_BT_Eu_ru_202_g1_i1:g.4552:m.4552        | 5.23    | 3.53    | NO  |          |
|               | Gene.126531:c20465_BT_Eu_ru_202_g1_i1:g.126531:m.126531 | 1.92    | 0.99    | NO  |          |
|               | Gene.56303:c8008_BT_Eu_ru_202_g1_i1:g.56303:m.56303     | 2.45    | 1.58    | NO  |          |
|               | Gene.120000:c12771_BT_Eu_ru_202_g1_i1:g.120000:m.120000 | 2.47    | 1.62    | NO  |          |
|               | Gene.162148:c54544_BT_Eu_ru_202_g1_i1:g.162148:m.162148 | 1.90    | 1.41    | NO  |          |
|               | Gene.4553:c1057_BT_Eu_ru_202_g1_i1:g.4553:m.4553        | 4.09    | 3.97    | NO  |          |
|               | Gene.128951:c21889_BT_Eu_ru_202_g1_i1:g.128951:m.128951 | 2.61    | 1.98    | NO  |          |
|               | Gene.154511:c46721_BT_Eu_ru_202_g1_i1:g.154511:m.154511 | 1.71    | 0.93    | NO  |          |
|               | Gene.120001:c12771_BT_Eu_ru_202_g1_i1:g.120001:m.120001 | 3.49    | 3.93    | NO  |          |
|               | Gene.126010:c20265_BT_Eu_ru_202_g1_i1:g.126010:m.126010 | 1.41    | 0.91    | NO  |          |
|               | Gene.2037:c474_BT_Eu_ru_202_g1_i1:g.2037:m.2037         | 1.77    | 0.86    | NO  |          |
|               | Gene.126854:c20581_BT_Eu_ru_202_g1_i1:g.126854:m.126854 | 1.34    | 0.71    | NO  |          |
|               | Gene.109803:c10403_BT_Eu_ru_202_g1_i2:g.109803:m.109803 | 2.68    | 1.42    | NO  |          |
|               | Gene.117351:c11208_BT_Eu_ru_202_g1_i1:g.117351:m.117351 | 1.33    | 1.02    | NO  |          |
|               | Gene.109801:c10403_BT_Eu_ru_202_g2_i2:g.109801:m.109801 | 2.46    | 1.32    | NO  |          |
|               | Gene.117424:c11247_BT_Eu_ru_202_g1_i1:g.117424:m.117424 | 1.73    | 0.98    | NO  |          |
|               | Gene.127646:c20999_BT_Eu_ru_202_g1_i1:g.127646:m.127646 | 1.41    | 0.93    | NO  |          |
|               | Gene.67:c15_BT_Eu_ru_202_g1_i1:g.67:m.67                | 1.17    | 0.82    | NO  |          |
|               | Gene.147075:c39117_BT_Eu_ru_202_g1_i1:g.147075:m.147075 | 1.64    | 0.99    | NO  |          |
|               | Gene.162654:c54832_BT_Eu_ru_202_g1_i1:g.162654:m.162654 | 1.49    | 1.56    | NO  |          |
|               | Gene.4554:c1057_BT_Eu_ru_202_g1_i1:g.4554:m.4554        | 2.30    | 0.92    | NO  |          |
|               | Gene.163631:c55458_BT_Eu_ru_202_g1_i1:g.163631:m.163631 | 1.05    | 0.54    | NO  |          |
|               | Gene.141178:c34886_BT_Eu_ru_202_g1_i1:g.141178:m.141178 | 1.26    | 0.75    | NO  |          |
|               | Gene.5032:c1208_BT_Eu_ru_202_g1_i1:g.5032:m.5032        | 0.95    | 1.16    | YES |          |
|               | Gene.116220:c10772_BT_Eu_ru_202_g1_i1:g.116220:m.116220 | 0.96    | 1.19    | NO  |          |
|               | Gene.138231:c31214_BT_Eu_ru_202_g1_i1:g.138231:m.138231 | 1.05    | 0.93    | NO  |          |
|               | Gene.136608:c29798_BT_Eu_ru_202_g1_i1:g.136608:m.136608 | 0.52    | 0.98    | NO  |          |
|               | Gene.147335:c39397_BT_Eu_ru_202_g1_i1:g.147335:m.147335 | 0.70    | 1.59    | NO  |          |
|               | Gene.120580:c13241_BT_Eu_ru_202_g1_i1:g.120580:m.120580 | 0.58    | 1.32    | NO  |          |
|               | Gene.122511:c15171_BT_Eu_ru_202_g1_i1:g.122511:m.122511 | 0.54    | 0.74    | NO  |          |
|               | Gene.129497:c22349_BT_Eu_ru_202_g1_i1:g.129497:m.129497 | 0.69    | 1.78    | NO  |          |
|               | Gene.133810:c28059_BT_Eu_ru_202_g1_i1:g.133810:m.133810 | 0.73    | 0.00    | NO  |          |
|               | Gene.135954:c29397_BT_Eu_ru_202_g1_i1:g.135954:m.135954 | 0.60    | 0.63    | NO  |          |
|               | Gene.147945:c40018_BT_Eu_ru_202_g1_i1:g.147945:m.147945 | 0.70    | 1.86    | NO  |          |
|               | Gene.131115:c24020_BT_Eu_ru_202_g1_i1:g.131115:m.131115 | 0.71    | 2.92    | NO  |          |
|               | Gene.132928:c26412_BT_Eu_ru_202_g1_i1:g.132928:m.132928 | 0.89    | 2.70    | NO  |          |
|               | Gene.141203:c34937_BT_Eu_ru_202_g1_i1:g.141203:m.141203 | 0.66    | 0.00    | NO  |          |
|               | Gene.123892:c16918_BT_Eu_ru_202_g1_i1:g.123892:m.123892 | 0.70    | 0.00    | NO  |          |
|               | Gene.131761:c24802_BT_Eu_ru_202_g1_i1:g.131761:m.131761 | 0.42    | 1.23    | NO  |          |
|               | Gene.141470:c35432_BT_Eu_ru_202_g1_i1:g.141470:m.141470 | 0.60    | 4.66    | NO  |          |
|               | Gene.160182:c53593_BT_Eu_ru_202_g1_i1:g.160182:m.160182 | 0.74    | 0.00    | NO  |          |
|               | Gene.145366:c37708_BT_Eu_ru_202_g1_i1:g.145366:m.145366 | 0.44    | 0.00    | NO  |          |
|               | Gene.147527:c39608_BT_Eu_ru_202_g1_i1:g.147527:m.147527 | 0.51    | 0.00    | NO  |          |
|               | Gene.132156:c25347_BT_Eu_ru_202_g1_i1:g.132156:m.132156 | 0.35    | 2.76    | NO  |          |
|               | Gene.166801:c58564_BT_Eu_ru_202_g1_i1:g.166801:m.166801 | 0.29    | 5.07    | NO  |          |
| Peptidase M14 | Gene.151432:c45264_BT_Eu_ru_202_g1_i1:g.151432:m.151432 | 801.42  | 484.53  | NO  |          |
|               | Gene.126185:c20337_BT_Eu_ru_202_g1_i1:g.126185:m.126185 | 338.25  | 194.62  | NO  |          |
|               | Gene.125932:c20241_BT_Eu_ru_202_g1_i1:g.125932:m.125932 | 125.57  | 75.55   | NO  |          |
|               | Gene.44827:c7204_BT_Eu_ru_202_g2_i2:g.44827:m.44827     | 29.52   | 0.39    | YES |          |
|               | Gene.44817:c7204_BT_Eu_ru_202_g2_i1:g.44817:m.44817     | 28.24   | 11.72   | YES |          |
|               | Gene.44835:c7204_BT_Eu_ru_202_g2_i3:g.44835:m.44835     | 29.58   | 1.27    | YES |          |
|               | Gene.93762:c9845_BT_Eu_ru_202_g2_i1:g.93762:m.93762     | 101.44  | 35.94   | YES |          |
|               | Gene.93768:c9845_BT_Eu_ru_202_g2_i2:g.93768:m.93768     | 101.44  | 35.94   | YES |          |
|               | Gene.93760:c9845_BT_Eu_ru_202_g1_i1:g.93760:m.93760     | 104.59  | 64.46   | NO  |          |
|               | Gene.44846:c7204_BT_Eu_ru_202_g2_i5:g.44846:m.44846     | 41.28   | 18.83   | YES |          |
|               | Gene.11984:c2859_BT_Eu_ru_202_g1_i1:g.11984:m.11984     | 36.84   | 22.63   | NO  |          |
|               | Gene.116370:c10828_BT_Eu_ru_202_g1_i1:g.116370:m.116370 | 41.31   | 29.29   | NO  |          |
|               | Gene.161025:c54021_BT_Eu_ru_202_g1_i1:g.161025:m.161025 | 12.19   | 6.80    | NO  |          |
|               | Gene.44841:c7204_BT_Eu_ru_202_g2_i4:g.44841:m.44841     | 13.33   | 1.33    | YES |          |
|               | Gene.40121:c6833_BT_Eu_ru_202_g1_i3:g.40121:m.40121     | 4.70    | 1.08    | YES |          |
|               | Gene.40117:c6833_BT_Eu_ru_202_g1_i2:g.40117:m.40117     | 4.20    | 0.88    | YES |          |
|               | Gene.40112:c6833_BT_Eu_ru_202_g1_i1:g.40112:m.40112     | 4.49    | 0.62    | YES |          |
|               | Gene.162109:c54521_BT_Eu_ru_202_g1_i1:g.162109:m.162109 | 4.05    | 2.81    | NO  |          |
|               | Gene.137700:c30704_BT_Eu_ru_202_g1_i1:g.137700:m.137700 | 0.71    | 0.00    | NO  |          |
|               | Gene.122691:c15383_BT_Eu_ru_202_g1_i1:g.122691:m.122691 | 0.83    | 0.66    | NO  |          |
|               | Gene.154952:c47058_BT_Eu_ru_202_g1_i1:g.154952:m.154952 | 0.72    | 0.43    | NO  |          |
|               | Gene.121304:c13918_BT_Eu_ru_202_g1_i1:g.121304:m.121304 | 0.53    | 1.15    | NO  |          |
|               | Gene.146822:c38846_BT_Eu_ru_202_g1_i1:g.146822:m.146822 | 0.67    | 1.24    | NO  |          |
|               | Gene.158738:c51017_BT_Eu_ru_202_g1_i1:g.158738:m.158738 | 0.46    | 0.98    | NO  |          |
|               | Gene.118410:c11747_BT_Eu_ru_202_g1_i1:g.118410:m.118410 | 0.59    | 1.46    | NO  |          |
| Peptidase S10 | Gene.56023:c7990_BT_Eu_ru_202_g1_i1:g.56023:m.56023     | 110.34  | 64.26   | YES |          |
|               | Gene.126554:c20475_BT_Eu_ru_202_g1_i1:g.126554:m.126554 | 40.65   | 24.81   | NO  |          |
|               | Gene.74343:c9062_BT_Eu_ru_202_g1_i1:g.74343:m.74343     | 6.56    | 3.09    | YES |          |
| Peptidase S1  | Gene.1164:c246_BT_Eu_ru_202_g1_i1:g.1164:m.1164         | 2110.08 | 1305.22 | YES |          |
|               | Gene.77973:c9226_BT_Eu_ru_202_g1_i1:g.77973:m.77973     | 1734.55 | 1128.15 | YES |          |
|               | Gene.44555:c7186_BT_Eu_ru_202_g1_i1:g.44555:m.44555     | 1347.79 | 836.98  | YES |          |
|               | Gene.27841:c5556_BT_Eu_ru_202_g1_i1:g.27841:m.27841     | 1132.26 | 732.20  | YES |          |
|               | Gene.161299:c54149_BT_Eu_ru_202_g1_i1:g.161299:m.161299 | 1094.87 | 704.45  | NO  |          |
|               | Gene.30986:c5960_BT_Eu_ru_202_g1_i1:g.30986:m.30986     | 898.09  | 596.47  | YES |          |
|               | Gene.45971:c7278_BT_Eu_ru_202_g1_i1:g.45971:m.45971     | 903.05  | 589.55  | YES |          |
|               | Gene.71847:c8913_BT_Eu_ru_202_g1_i1:g.71847:m.71847     | 675.81  | 448.89  | NO  |          |
|               | Gene.21632:c4688_BT_Eu_ru_202_g1_i1:g.21632:m.21632     | 710.49  | 459.02  | YES |          |
|               | Gene.84017:c9455_BT_Eu_ru_202_g1_i1:g.84017:m.84017     | 63.95   | 23.59   | YES |          |
|               | Gene.70893:c8871_BT_Eu_ru_202_g1_i1:g.70893:m.70893     | 474.83  | 381.77  | YES | excluded |
|               | Gene.154678:c46846_BT_Eu_ru_202_g1_i1:g.154678:m.154678 | 415.61  | 275.85  | NO  |          |
|               | Gene.84040:c9455_BT_Eu_ru_202_g1_i2:g.84040:m.84040     | 75.32   | 17.37   | YES | excluded |
|               | Gene.36925:c6548_BT_Eu_ru_202_g1_i1:g.36925:m.36925     | 339.41  | 226.89  | YES |          |
|               | Gene.51851:c7708_BT_Eu_ru_202_g1_i1:g.51851:m.51851     | 213.68  | 132.44  | YES |          |
|               | Gene.79666:c9289_BT_Eu_ru_202_g1_i1:g.79666:m.79666     | 320.02  | 179.24  | YES |          |
|               | Gene.68770:c8765_BT_Eu_ru_202_g2_i2:g.68770:m.68770     | 174.60  | 62.73   | YES |          |
|               | Gene.79670:c9289_BT_Eu_ru_202_g1_i2:g.79670:m.79670     | 239.15  | 52.56   | YES |          |
|               | Gene.68759:c8765_BT_Eu_ru_202_g2_i1:g.68759:m.68759     | 166.91  | 45.85   | YES |          |
|               | Gene.19914:c4449_BT_Eu_ru_202_g1_i1:g.19914:m.19914     | 167.49  | 105.77  | YES |          |

|  |                                                            |        |        |     |          |
|--|------------------------------------------------------------|--------|--------|-----|----------|
|  | Gene.35606::c6400_BT_Eu_ru_202_g1_i1::g.35606::m.35606     | 203.90 | 131.52 | YES |          |
|  | Gene.134496::c28673_BT_Eu_ru_202_g1_i1::g.134496::m.134496 | 215.02 | 144.38 | NO  |          |
|  | Gene.88825::c9654_BT_Eu_ru_202_g1_i1::g.88825::m.88825     | 202.01 | 135.65 | YES |          |
|  | Gene.56692::c8029_BT_Eu_ru_202_g1_i1::g.56692::m.56692     | 184.58 | 116.94 | YES |          |
|  | Gene.33906::c6234_BT_Eu_ru_202_g1_i1::g.33906::m.33906     | 164.13 | 104.82 | NO  |          |
|  | Gene.8758::c2145_BT_Eu_ru_202_g2_i1::g.8758::m.8758        | 170.32 | 110.98 | YES |          |
|  | Gene.38453::c6697_BT_Eu_ru_202_g1_i1::g.38453::m.38453     | 169.72 | 115.57 | YES |          |
|  | Gene.40524::c6874_BT_Eu_ru_202_g1_i1::g.40524::m.40524     | 35.10  | 13.13  | NO  | excluded |
|  | Gene.41446::c6944_BT_Eu_ru_202_g1_i1::g.41446::m.41446     | 150.58 | 100.36 | YES |          |
|  | Gene.160590::c53866_BT_Eu_ru_202_g1_i1::g.160590::m.160590 | 131.45 | 85.14  | NO  |          |
|  | Gene.58755::c8133_BT_Eu_ru_202_g1_i1::g.58755::m.58755     | 123.13 | 77.08  | NO  |          |
|  | Gene.84335::c9468_BT_Eu_ru_202_g1_i1::g.84335::m.84335     | 79.36  | 24.58  | NO  |          |
|  | Gene.84341::c9468_BT_Eu_ru_202_g1_i2::g.84341::m.84341     | 79.36  | 24.58  | NO  |          |
|  | Gene.84348::c9468_BT_Eu_ru_202_g1_i3::g.84348::m.84348     | 79.37  | 0.00   | NO  |          |
|  | Gene.84355::c9468_BT_Eu_ru_202_g1_i4::g.84355::m.84355     | 79.37  | 0.00   | NO  |          |
|  | Gene.81799::c9367_BT_Eu_ru_202_g1_i1::g.81799::m.81799     | 111.42 | 70.21  | YES |          |
|  | Gene.15817::c3781_BT_Eu_ru_202_g1_i1::g.15817::m.15817     | 17.44  | 9.53   | NO  | excluded |
|  | Gene.125984::c20252_BT_Eu_ru_202_g1_i1::g.125984::m.125984 | 108.34 | 66.45  | NO  |          |
|  | Gene.60623::c8272_BT_Eu_ru_202_g1_i2::g.60623::m.60623     | 79.20  | 42.70  | YES |          |
|  | Gene.21811::c4712_BT_Eu_ru_202_g1_i1::g.21811::m.21811     | 103.44 | 66.80  | YES |          |
|  | Gene.46212::c7294_BT_Eu_ru_202_g1_i1::g.46212::m.46212     | 69.12  | 45.62  | YES |          |
|  | Gene.8757::c2145_BT_Eu_ru_202_g2_i1::g.8757::m.8757        | 94.91  | 62.92  | YES |          |
|  | Gene.36583::c6505_BT_Eu_ru_202_g1_i1::g.36583::m.36583     | 94.66  | 61.48  | YES |          |
|  | Gene.67547::c8693_BT_Eu_ru_202_g1_i1::g.67547::m.67547     | 69.35  | 46.74  | YES |          |
|  | Gene.60619::c8272_BT_Eu_ru_202_g1_i1::g.60619::m.60619     | 66.33  | 36.32  | YES |          |
|  | Gene.48972::c7511_BT_Eu_ru_202_g1_i1::g.48972::m.48972     | 86.96  | 60.23  | NO  |          |
|  | Gene.83624::c9441_BT_Eu_ru_202_g3_i1::g.83624::m.83624     | 45.34  | 29.31  | YES |          |
|  | Gene.40536::c6874_BT_Eu_ru_202_g1_i2::g.40536::m.40536     | 57.63  | 24.31  | NO  |          |
|  | Gene.34860::c6333_BT_Eu_ru_202_g1_i1::g.34860::m.34860     | 73.31  | 46.93  | YES |          |
|  | Gene.56698::c8029_BT_Eu_ru_202_g2_i1::g.56698::m.56698     | 77.14  | 48.89  | YES |          |
|  | Gene.72687::c8962_BT_Eu_ru_202_g1_i1::g.72687::m.72687     | 75.85  | 50.07  | YES |          |
|  | Gene.139587::c32623_BT_Eu_ru_202_g1_i1::g.139587::m.139587 | 83.68  | 51.86  | NO  |          |
|  | Gene.117739::c11393_BT_Eu_ru_202_g1_i1::g.117739::m.117739 | 49.04  | 32.68  | NO  |          |
|  | Gene.72179::c8934_BT_Eu_ru_202_g2_i1::g.72179::m.72179     | 37.26  | 23.05  | YES |          |
|  | Gene.114375::c10524_BT_Eu_ru_202_g1_i2::g.114375::m.114375 | 55.88  | 8.92   | NO  |          |
|  | Gene.114400::c10524_BT_Eu_ru_202_g1_i6::g.114400::m.114400 | 55.16  | 18.80  | NO  |          |
|  | Gene.2708::c658_BT_Eu_ru_202_g1_i2::g.2708::m.2708         | 30.01  | 9.28   | YES |          |
|  | Gene.126406::c20430_BT_Eu_ru_202_g1_i1::g.126406::m.126406 | 61.29  | 40.37  | NO  |          |
|  | Gene.91044::c9739_BT_Eu_ru_202_g1_i1::g.91044::m.91044     | 72.72  | 52.00  | YES |          |
|  | Gene.113485::c10499_BT_Eu_ru_202_g1_i1::g.113485::m.113485 | 7.64   | 3.90   | NO  | excluded |
|  | Gene.34163::c6268_BT_Eu_ru_202_g1_i1::g.34163::m.34163     | 60.20  | 41.02  | YES |          |
|  | Gene.15892::c3796_BT_Eu_ru_202_g1_i1::g.15892::m.15892     | 47.88  | 27.86  | YES |          |
|  | Gene.114382::c10524_BT_Eu_ru_202_g1_i3::g.114382::m.114382 | 58.79  | 19.95  | NO  |          |
|  | Gene.16139::c3881_BT_Eu_ru_202_g1_i1::g.16139::m.16139     | 57.53  | 39.87  | YES |          |
|  | Gene.145570::c37840_BT_Eu_ru_202_g1_i1::g.145570::m.145570 | 48.69  | 34.12  | NO  |          |
|  | Gene.114393::c10524_BT_Eu_ru_202_g1_i5::g.114393::m.114393 | 56.02  | 1.43   | NO  |          |
|  | Gene.48858::c7498_BT_Eu_ru_202_g1_i1::g.48858::m.48858     | 66.26  | 50.19  | NO  |          |
|  | Gene.114406::c10524_BT_Eu_ru_202_g1_i7::g.114406::m.114406 | 57.45  | 2.73   | NO  |          |
|  | Gene.117552::c11323_BT_Eu_ru_202_g1_i1::g.117552::m.117552 | 44.58  | 29.35  | NO  |          |
|  | Gene.14311::c3408_BT_Eu_ru_202_g1_i1::g.14311::m.14311     | 39.09  | 27.42  | YES |          |
|  | Gene.60095::c8241_BT_Eu_ru_202_g1_i1::g.60095::m.60095     | 41.04  | 26.79  | YES |          |
|  | Gene.69264::c8790_BT_Eu_ru_202_g1_i1::g.69264::m.69264     | 29.14  | 19.16  | YES |          |
|  | Gene.37431::c6603_BT_Eu_ru_202_g1_i1::g.37431::m.37431     | 40.90  | 26.57  | YES |          |
|  | Gene.116614::c10907_BT_Eu_ru_202_g1_i1::g.116614::m.116614 | 36.99  | 24.89  | NO  |          |
|  | Gene.19630::c4411_BT_Eu_ru_202_g1_i1::g.19630::m.19630     | 36.23  | 25.65  | YES |          |
|  | Gene.152447::c45613_BT_Eu_ru_202_g1_i1::g.152447::m.152447 | 34.05  | 21.55  | NO  |          |
|  | Gene.58708::c8128_BT_Eu_ru_202_g1_i1::g.58708::m.58708     | 23.55  | 15.07  | YES |          |
|  | Gene.14194::c3384_BT_Eu_ru_202_g1_i2::g.14194::m.14194     | 15.67  | 9.10   | YES |          |
|  | Gene.115368::c10547_BT_Eu_ru_202_g1_i4::g.115368::m.115368 | 31.02  | 20.41  | NO  |          |
|  | Gene.161313::c54150_BT_Eu_ru_202_g1_i1::g.161313::m.161313 | 32.10  | 20.93  | NO  |          |
|  | Gene.91010::c9738_BT_Eu_ru_202_g1_i1::g.91010::m.91010     | 19.41  | 7.20   | YES |          |
|  | Gene.115376::c10547_BT_Eu_ru_202_g1_i7::g.115376::m.115376 | 29.04  | 15.24  | NO  |          |
|  | Gene.42609::c7057_BT_Eu_ru_202_g1_i1::g.42609::m.42609     | 32.71  | 20.04  | YES |          |
|  | Gene.142808::c36336_BT_Eu_ru_202_g1_i1::g.142808::m.142808 | 30.00  | 19.02  | NO  |          |
|  | Gene.145963::c38114_BT_Eu_ru_202_g1_i1::g.145963::m.145963 | 21.65  | 15.00  | NO  |          |
|  | Gene.114412::c10524_BT_Eu_ru_202_g1_i8::g.114412::m.114412 | 53.58  | 25.76  | NO  |          |
|  | Gene.146050::c38183_BT_Eu_ru_202_g1_i1::g.146050::m.146050 | 25.95  | 16.73  | NO  |          |
|  | Gene.151736::c45342_BT_Eu_ru_202_g1_i1::g.151736::m.151736 | 23.18  | 15.26  | NO  |          |
|  | Gene.130610::c23430_BT_Eu_ru_202_g1_i1::g.130610::m.130610 | 24.71  | 15.99  | NO  |          |
|  | Gene.26986::c5444_BT_Eu_ru_202_g1_i1::g.26986::m.26986     | 24.47  | 14.91  | YES |          |
|  | Gene.154358::c46637_BT_Eu_ru_202_g1_i1::g.154358::m.154358 | 18.51  | 12.08  | NO  |          |
|  | Gene.157749::c49727_BT_Eu_ru_202_g1_i1::g.157749::m.157749 | 23.47  | 14.26  | NO  |          |
|  | Gene.114407::c10524_BT_Eu_ru_202_g1_i7::g.114407::m.114407 | 62.05  | 81.89  | NO  |          |
|  | Gene.40591::c6882_BT_Eu_ru_202_g1_i2::g.40591::m.40591     | 21.08  | 13.09  | YES |          |
|  | Gene.36495::c6491_BT_Eu_ru_202_g1_i1::g.36495::m.36495     | 27.07  | 20.20  | NO  |          |
|  | Gene.115363::c10547_BT_Eu_ru_202_g1_i2::g.115363::m.115363 | 22.55  | 13.37  | NO  |          |
|  | Gene.23002::c4858_BT_Eu_ru_202_g1_i1::g.23002::m.23002     | 19.41  | 13.44  | NO  |          |
|  | Gene.91030::c9738_BT_Eu_ru_202_g1_i6::g.91030::m.91030     | 17.47  | 5.32   | YES |          |
|  | Gene.144667::c37260_BT_Eu_ru_202_g1_i1::g.144667::m.144667 | 19.71  | 13.48  | NO  |          |
|  | Gene.32351::c6088_BT_Eu_ru_202_g1_i1::g.32351::m.32351     | 19.22  | 10.93  | YES |          |
|  | Gene.11268::c2718_BT_Eu_ru_202_g1_i1::g.11268::m.11268     | 8.44   | 4.99   | YES |          |
|  | Gene.50116::c7580_BT_Eu_ru_202_g1_i2::g.50116::m.50116     | 19.08  | 12.57  | YES |          |
|  | Gene.16455::c3970_BT_Eu_ru_202_g1_i2::g.16455::m.16455     | 17.10  | 10.29  | YES |          |
|  | Gene.23608::c4977_BT_Eu_ru_202_g1_i1::g.23608::m.23608     | 5.45   | 3.33   | NO  | excluded |
|  | Gene.37271::c6581_BT_Eu_ru_202_g1_i1::g.37271::m.37271     | 18.97  | 12.22  | YES |          |
|  | Gene.91013::c9738_BT_Eu_ru_202_g1_i2::g.91013::m.91013     | 18.19  | 0.24   | YES |          |
|  | Gene.91019::c9738_BT_Eu_ru_202_g1_i3::g.91019::m.91019     | 18.19  | 0.24   | YES |          |
|  | Gene.97941::c10009_BT_Eu_ru_202_g2_i2::g.97941::m.97941    | 6.76   | 4.28   | YES |          |
|  | Gene.114414::c10524_BT_Eu_ru_202_g1_i8::g.114414::m.114414 | 45.42  | 0.00   | NO  |          |
|  | Gene.7185::c1676_BT_Eu_ru_202_g1_i1::g.7185::m.7185        | 17.61  | 12.11  | YES |          |
|  | Gene.84461::c9476_BT_Eu_ru_202_g1_i1::g.84461::m.84461     | 17.87  | 11.36  | YES |          |
|  | Gene.58803::c8136_BT_Eu_ru_202_g1_i1::g.58803::m.58803     | 16.79  | 11.42  | NO  |          |
|  | Gene.83642::c9441_BT_Eu_ru_202_g2_i3::g.83642::m.83642     | 9.92   | 6.47   | YES |          |
|  | Gene.40587::c6882_BT_Eu_ru_202_g1_i1::g.40587::m.40587     | 22.01  | 1.16   | YES |          |
|  | Gene.114388::c10524_BT_Eu_ru_202_g1_i4::g.114388::m.114388 | 28.79  | 14.38  | NO  |          |
|  | Gene.1080::c226_BT_Eu_ru_202_g1_i1::g.1080::m.1080         | 15.12  | 11.11  | YES |          |
|  | Gene.83612::c9441_BT_Eu_ru_202_g1_i1::g.83612::m.83612     | 9.21   | 2.26   | YES |          |
|  | Gene.83648::c9441_BT_Eu_ru_202_g1_i3::g.83648::m.83648     | 9.21   | 2.26   | YES |          |
|  | Gene.5808::c1428_BT_Eu_ru_202_g1_i1::g.5808::m.5808        | 58.50  | 95.63  | YES |          |
|  | Gene.126058::c20280_BT_Eu_ru_202_g1_i1::g.126058::m.126058 | 14.28  | 9.75   | NO  |          |
|  | Gene.56442::c8017_BT_Eu_ru_202_g1_i1::g.56442::m.56442     | 12.09  | 8.75   | YES |          |
|  | Gene.113750::c10506_BT_Eu_ru_202_g1_i2::g.113750::m.113750 | 14.48  | 6.09   | NO  |          |
|  | Gene.113740::c10506_BT_Eu_ru_202_g1_i1::g.113740::m.113740 | 13.95  | 4.16   | NO  |          |
|  | Gene.69269::c8790_BT_Eu_ru_202_g1_i2::g.69269::m.69269     | 30.37  | 12.01  | NO  |          |
|  | Gene.27821::c5552_BT_Eu_ru_202_g1_i1::g.27821::m.27821     | 46.26  | 62.52  | YES |          |
|  | Gene.129390::c22264_BT_Eu_ru_202_g1_i1::g.129390::m.129390 | 27.03  | 31.46  | NO  |          |
|  | Gene.114394::c10524_BT_Eu_ru_202_g1_i5::g.114394::m.114394 | 35.23  | 14.84  | NO  |          |
|  | Gene.5230::c1260_BT_Eu_ru_202_g1_i1::g.5230::m.5230        | 11.82  | 7.33   | YES |          |
|  | Gene.91039::c9738_BT_Eu_ru_202_g1_i7::g.91039::m.91039     | 16.96  | 5.01   | NO  |          |
|  | Gene.93875::c9850_BT_Eu_ru_202_g1_i1::g.93875::m.93875     | 10.50  | 7.25   | NO  |          |
|  | Gene.115360::c10547_BT_Eu_ru_202_g1_i1::g.115360::m.115360 | 22.84  | 9.42   | NO  |          |
|  | Gene.9118::c2199_BT_Eu_ru_202_g1_i1::g.9118::m.9118        | 4.61   | 1.62   | NO  |          |
|  | Gene.83631::c9441_BT_Eu_ru_202_g1_i2::g.83631::m.83631     | 8.93   | 2.79   | NO  |          |

|                                                            |       |       |     |
|------------------------------------------------------------|-------|-------|-----|
| Gene.114373::c10524_BT_Eu_ru_202_g1_i1::g.114373::m.114373 | 36.97 | 13.46 | NO  |
| Gene.9127::c2199_BT_Eu_ru_202_g1_i2::g.9127::m.9127        | 4.54  | 0.95  | NO  |
| Gene.67552::c8693_BT_Eu_ru_202_g2_i2::g.67552::m.67552     | 11.45 | 8.52  | NO  |
| Gene.6273::c1513_BT_Eu_ru_202_g1_i2::g.6273::m.6273        | 7.38  | 4.96  | YES |
| Gene.115380::c10547_BT_Eu_ru_202_g1_i8::g.115380::m.115380 | 22.03 | 11.29 | NO  |
| Gene.21751::c4705_BT_Eu_ru_202_g1_i2::g.21751::m.21751     | 8.68  | 5.97  | YES |
| Gene.134225::c28571_BT_Eu_ru_202_g1_i1::g.134225::m.134225 | 8.11  | 5.82  | NO  |
| Gene.146473::c38519_BT_Eu_ru_202_g1_i1::g.146473::m.146473 | 44.08 | 67.34 | NO  |
| Gene.19155::c4343_BT_Eu_ru_202_g1_i1::g.19155::m.19155     | 8.95  | 6.47  | NO  |
| Gene.16452::c3970_BT_Eu_ru_202_g1_i1::g.16452::m.16452     | 15.65 | 1.50  | NO  |
| Gene.69268::c8790_BT_Eu_ru_202_g1_i2::g.69268::m.69268     | 17.44 | 0.79  | NO  |
| Gene.50112::c7580_BT_Eu_ru_202_g1_i1::g.50112::m.50112     | 18.14 | 0.00  | NO  |
| Gene.91014::c9738_BT_Eu_ru_202_g1_i2::g.91014::m.91014     | 20.21 | 3.06  | NO  |
| Gene.91028::c9738_BT_Eu_ru_202_g1_i5::g.91028::m.91028     | 20.21 | 3.06  | NO  |
| Gene.106529::c10296_BT_Eu_ru_202_g1_i2::g.106529::m.106529 | 14.91 | 6.74  | NO  |
| Gene.106534::c10296_BT_Eu_ru_202_g1_i3::g.106534::m.106534 | 14.91 | 6.74  | NO  |
| Gene.118873::c12019_BT_Eu_ru_202_g1_i1::g.118873::m.118873 | 8.23  | 5.11  | NO  |
| Gene.2470::c593_BT_Eu_ru_202_g1_i1::g.2470::m.2470         | 22.10 | 17.71 | NO  |
| Gene.30241::c5889_BT_Eu_ru_202_g1_i1::g.30241::m.30241     | 7.85  | 5.04  | YES |
| Gene.34325::c6286_BT_Eu_ru_202_g1_i1::g.34325::m.34325     | 7.67  | 4.92  | YES |
| Gene.106530::c10296_BT_Eu_ru_202_g1_i2::g.106530::m.106530 | 14.37 | 13.08 | NO  |
| Gene.16385::c3949_BT_Eu_ru_202_g1_i1::g.16385::m.16385     | 7.34  | 5.23  | YES |
| Gene.51668::c7696_BT_Eu_ru_202_g1_i1::g.51668::m.51668     | 7.37  | 4.43  | YES |
| Gene.16453::c3970_BT_Eu_ru_202_g1_i1::g.16453::m.16453     | 13.17 | 1.27  | YES |
| Gene.34333::c6286_BT_Eu_ru_202_g1_i3::g.34333::m.34333     | 4.31  | 1.40  | YES |
| Gene.115365::c10547_BT_Eu_ru_202_g1_i3::g.115365::m.115365 | 13.59 | 7.52  | NO  |
| Gene.145897::c38070_BT_Eu_ru_202_g1_i1::g.145897::m.145897 | 3.63  | 2.26  | NO  |
| Gene.36546::c6500_BT_Eu_ru_202_g1_i1::g.36546::m.36546     | 6.47  | 3.88  | NO  |
| Gene.91026::c9738_BT_Eu_ru_202_g1_i4::g.91026::m.91026     | 17.08 | 1.82  | NO  |
| Gene.34329::c6286_BT_Eu_ru_202_g1_i2::g.34329::m.34329     | 9.23  | 6.98  | NO  |
| Gene.15486::c3681_BT_Eu_ru_202_g1_i1::g.15486::m.15486     | 5.75  | 5.27  | NO  |
| Gene.165360::c56952_BT_Eu_ru_202_g1_i1::g.165360::m.165360 | 4.29  | 2.77  | NO  |
| Gene.126160::c20326_BT_Eu_ru_202_g1_i1::g.126160::m.126160 | 3.24  | 2.08  | NO  |
| Gene.32881::c6144_BT_Eu_ru_202_g1_i1::g.32881::m.32881     | 4.49  | 3.47  | YES |
| Gene.4253::c1005_BT_Eu_ru_202_g1_i1::g.4253::m.4253        | 3.05  | 2.24  | YES |
| Gene.118261::c11656_BT_Eu_ru_202_g1_i1::g.118261::m.118261 | 4.04  | 2.53  | NO  |
| Gene.114887::c10538_BT_Eu_ru_202_g1_i3::g.114887::m.114887 | 4.47  | 6.28  | NO  |
| Gene.20503::c4538_BT_Eu_ru_202_g1_i1::g.20503::m.20503     | 2.51  | 1.47  | YES |
| Gene.23952::c5018_BT_Eu_ru_202_g1_i2::g.23952::m.23952     | 2.58  | 1.90  | YES |
| Gene.13302::c3145_BT_Eu_ru_202_g1_i2::g.13302::m.13302     | 4.33  | 3.91  | NO  |
| Gene.119498::c12415_BT_Eu_ru_202_g1_i1::g.119498::m.119498 | 3.24  | 2.01  | NO  |
| Gene.6560::c1575_BT_Eu_ru_202_g1_i1::g.6560::m.6560        | 3.49  | 1.95  | YES |
| Gene.21190::c4641_BT_Eu_ru_202_g1_i1::g.21190::m.21190     | 2.90  | 1.04  | NO  |
| Gene.21748::c4705_BT_Eu_ru_202_g1_i1::g.21748::m.21748     | 6.54  | 0.00  | YES |
| Gene.21749::c4705_BT_Eu_ru_202_g1_i1::g.21749::m.21749     | 6.35  | 0.00  | NO  |
| Gene.114892::c10538_BT_Eu_ru_202_g1_i4::g.114892::m.114892 | 3.33  | 3.77  | NO  |
| Gene.21193::c4641_BT_Eu_ru_202_g1_i2::g.21193::m.21193     | 3.11  | 1.44  | NO  |
| Gene.23946::c5018_BT_Eu_ru_202_g1_i1::g.23946::m.23946     | 2.91  | 0.00  | NO  |
| Gene.13300::c3145_BT_Eu_ru_202_g1_i1::g.13300::m.13300     | 3.90  | 0.91  | NO  |
| Gene.91042::c9738_BT_Eu_ru_202_g1_i8::g.91042::m.91042     | 8.83  | 8.31  | NO  |
| Gene.119066::c12112_BT_Eu_ru_202_g1_i1::g.119066::m.119066 | 1.53  | 0.94  | NO  |
| Gene.135639::c29207_BT_Eu_ru_202_g1_i1::g.135639::m.135639 | 1.63  | 0.90  | NO  |
| Gene.33334::c6194_BT_Eu_ru_202_g1_i1::g.33334::m.33334     | 5.99  | 11.30 | NO  |
| Gene.114885::c10538_BT_Eu_ru_202_g1_i2::g.114885::m.114885 | 2.50  | 0.88  | NO  |
| Gene.143224::c36509_BT_Eu_ru_202_g1_i1::g.143224::m.143224 | 1.87  | 1.54  | NO  |
| Gene.2104::c496_BT_Eu_ru_202_g1_i1::g.2104::m.2104         | 2.08  | 1.79  | NO  |
| Gene.137866::c30863_BT_Eu_ru_202_g1_i1::g.137866::m.137866 | 1.86  | 0.90  | NO  |
| Gene.145921::c38086_BT_Eu_ru_202_g1_i1::g.145921::m.145921 | 1.47  | 1.31  | NO  |
| Gene.151744::c45345_BT_Eu_ru_202_g1_i1::g.151744::m.151744 | 1.22  | 0.65  | NO  |
| Gene.67551::c8693_BT_Eu_ru_202_g2_i1::g.67551::m.67551     | 7.97  | 7.27  | NO  |
| Gene.7216::c1687_BT_Eu_ru_202_g1_i1::g.7216::m.7216        | 1.73  | 1.18  | NO  |
| Gene.9763::c2291_BT_Eu_ru_202_g1_i1::g.9763::m.9763        | 1.28  | 1.08  | YES |
| Gene.2106::c496_BT_Eu_ru_202_g1_i2::g.2106::m.2106         | 1.99  | 0.00  | NO  |
| Gene.34724::c6320_BT_Eu_ru_202_g1_i2::g.34724::m.34724     | 2.31  | 1.07  | NO  |
| Gene.50864::c7632_BT_Eu_ru_202_g1_i2::g.50864::m.50864     | 2.36  | 1.87  | NO  |
| Gene.115372::c10547_BT_Eu_ru_202_g1_i5::g.115372::m.115372 | 4.71  | 10.23 | NO  |
| Gene.144101::c36940_BT_Eu_ru_202_g1_i1::g.144101::m.144101 | 1.20  | 0.68  | NO  |
| Gene.148111::c40197_BT_Eu_ru_202_g1_i1::g.148111::m.148111 | 1.22  | 0.61  | NO  |
| Gene.163607::c55446_BT_Eu_ru_202_g1_i1::g.163607::m.163607 | 1.11  | 0.77  | NO  |
| Gene.129899::c22733_BT_Eu_ru_202_g1_i1::g.129899::m.129899 | 2.31  | 3.46  | NO  |
| Gene.131697::c24719_BT_Eu_ru_202_g1_i1::g.131697::m.131697 | 1.18  | 0.51  | NO  |
| Gene.34723::c6320_BT_Eu_ru_202_g1_i1::g.34723::m.34723     | 2.13  | 0.39  | YES |
| Gene.155855::c47767_BT_Eu_ru_202_g1_i1::g.155855::m.155855 | 1.16  | 0.46  | NO  |
| Gene.120227::c12932_BT_Eu_ru_202_g1_i1::g.120227::m.120227 | 0.85  | 0.71  | NO  |
| Gene.15661::c3733_BT_Eu_ru_202_g1_i2::g.15661::m.15661     | 1.24  | 0.00  | NO  |
| Gene.133972::c28482_BT_Eu_ru_202_g1_i1::g.133972::m.133972 | 1.28  | 1.21  | NO  |
| Gene.164754::c56367_BT_Eu_ru_202_g1_i1::g.164754::m.164754 | 1.14  | 0.71  | NO  |
| Gene.50865::c7632_BT_Eu_ru_202_g1_i2::g.50865::m.50865     | 1.66  | 1.15  | NO  |
| Gene.153258::c46022_BT_Eu_ru_202_g1_i1::g.153258::m.153258 | 0.77  | 0.54  | NO  |
| Gene.157053::c48948_BT_Eu_ru_202_g1_i1::g.157053::m.157053 | 0.87  | 0.45  | NO  |
| Gene.114898::c10538_BT_Eu_ru_202_g1_i5::g.114898::m.114898 | 1.61  | 0.00  | NO  |
| Gene.42287::c7034_BT_Eu_ru_202_g1_i1::g.42287::m.42287     | 2.27  | 1.71  | NO  |
| Gene.3189::c803_BT_Eu_ru_202_g1_i1::g.3189::m.3189         | 1.70  | 1.52  | NO  |
| Gene.150125::c42822_BT_Eu_ru_202_g1_i1::g.150125::m.150125 | 3.22  | 8.40  | NO  |
| Gene.162612::c54807_BT_Eu_ru_202_g1_i1::g.162612::m.162612 | 1.42  | 1.44  | NO  |
| Gene.114884::c10538_BT_Eu_ru_202_g1_i1::g.114884::m.114884 | 2.07  | 0.00  | NO  |
| Gene.15655::c3733_BT_Eu_ru_202_g1_i1::g.15655::m.15655     | 1.33  | 2.53  | NO  |
| Gene.157208::c49112_BT_Eu_ru_202_g1_i1::g.157208::m.157208 | 1.00  | 1.40  | NO  |
| Gene.12987::c3063_BT_Eu_ru_202_g1_i1::g.12987::m.12987     | 1.16  | 2.27  | YES |
| Gene.130495::c23314_BT_Eu_ru_202_g1_i1::g.130495::m.130495 | 0.77  | 0.79  | NO  |
| Gene.144256::c37025_BT_Eu_ru_202_g1_i1::g.144256::m.144256 | 0.90  | 1.32  | NO  |
| Gene.146820::c38845_BT_Eu_ru_202_g1_i1::g.146820::m.146820 | 0.94  | 0.57  | NO  |
| Gene.122030::c14632_BT_Eu_ru_202_g1_i1::g.122030::m.122030 | 0.76  | 1.30  | NO  |
| Gene.128845::c21792_BT_Eu_ru_202_g1_i1::g.128845::m.128845 | 0.84  | 0.52  | NO  |
| Gene.138480::c31421_BT_Eu_ru_202_g1_i1::g.138480::m.138480 | 0.92  | 0.31  | NO  |
| Gene.151797::c45360_BT_Eu_ru_202_g1_i1::g.151797::m.151797 | 0.90  | 1.69  | NO  |
| Gene.166115::c57775_BT_Eu_ru_202_g1_i1::g.166115::m.166115 | 0.72  | 0.89  | NO  |
| Gene.4962::c1184_BT_Eu_ru_202_g1_i1::g.4962::m.4962        | 1.00  | 1.47  | NO  |
| Gene.137196::c30282_BT_Eu_ru_202_g1_i1::g.137196::m.137196 | 1.02  | 0.52  | NO  |
| Gene.138650::c31577_BT_Eu_ru_202_g1_i1::g.138650::m.138650 | 0.78  | 0.90  | NO  |
| Gene.140207::c33407_BT_Eu_ru_202_g1_i1::g.140207::m.140207 | 0.75  | 0.28  | NO  |
| Gene.162808::c54916_BT_Eu_ru_202_g1_i1::g.162808::m.162808 | 1.10  | 2.45  | NO  |
| Gene.83621::c9441_BT_Eu_ru_202_g2_i1::g.83621::m.83621     | 1.87  | 0.00  | NO  |
| Gene.118377::c11730_BT_Eu_ru_202_g1_i1::g.118377::m.118377 | 0.92  | 2.46  | NO  |
| Gene.139319::c32318_BT_Eu_ru_202_g1_i1::g.139319::m.139319 | 0.61  | 0.44  | NO  |
| Gene.133948::c28469_BT_Eu_ru_202_g1_i1::g.133948::m.133948 | 0.61  | 1.03  | NO  |
| Gene.129561::c22398_BT_Eu_ru_202_g1_i1::g.129561::m.129561 | 0.75  | 0.93  | NO  |
| Gene.131295::c24228_BT_Eu_ru_202_g1_i1::g.131295::m.131295 | 0.82  | 1.15  | NO  |
| Gene.143226::c36509_BT_Eu_ru_202_g1_i1::g.143226::m.143226 | 0.83  | 0.00  | NO  |
| Gene.149698::c42192_BT_Eu_ru_202_g1_i1::g.149698::m.149698 | 0.59  | 0.86  | NO  |
| Gene.120077::c12838_BT_Eu_ru_202_g1_i1::g.120077::m.120077 | 0.57  | 0.00  | NO  |
| Gene.132399::c25648_BT_Eu_ru_202_g1_i1::g.132399::m.132399 | 0.79  | 0.68  | NO  |
| Gene.115722::c10615_BT_Eu_ru_202_g1_i1::g.115722::m.115722 | 0.76  | 2.47  | NO  |

|                  |                                                           |        |       |     |          |
|------------------|-----------------------------------------------------------|--------|-------|-----|----------|
|                  | Gene.131022::c23904_BT_Eu_ru_202_g1_i1::g.131022:m.131022 | 0.93   | 2.76  | NO  |          |
|                  | Gene.131989::c25114_BT_Eu_ru_202_g1_i1::g.131989:m.131989 | 0.66   | 1.72  | NO  |          |
|                  | Gene.134686::c28757_BT_Eu_ru_202_g1_i1::g.134686:m.134686 | 0.69   | 1.27  | NO  |          |
|                  | Gene.139806::c32873_BT_Eu_ru_202_g1_i1::g.139806:m.139806 | 0.67   | 1.18  | NO  |          |
|                  | Gene.159454::c52138_BT_Eu_ru_202_g1_i1::g.159454:m.159454 | 0.67   | 1.18  | NO  |          |
|                  | Gene.163715::c55500_BT_Eu_ru_202_g1_i1::g.163715:m.163715 | 0.80   | 0.00  | NO  |          |
|                  | Gene.166924::c58703_BT_Eu_ru_202_g1_i1::g.166924:m.166924 | 0.47   | 0.58  | NO  |          |
|                  | Gene.42288::c7034_BT_Eu_ru_202_g1_i2::g.42288:m.42288     | 1.05   | 3.29  | NO  |          |
|                  | Gene.121926::c14518_BT_Eu_ru_202_g1_i1::g.121926:m.121926 | 0.56   | 2.16  | NO  |          |
|                  | Gene.132312::c25532_BT_Eu_ru_202_g1_i1::g.132312:m.132312 | 0.81   | 4.14  | NO  |          |
|                  | Gene.132591::c25923_BT_Eu_ru_202_g1_i1::g.132591:m.132591 | 0.49   | 0.41  | NO  |          |
|                  | Gene.155736::c47665_BT_Eu_ru_202_g1_i1::g.155736:m.155736 | 0.57   | 1.72  | NO  |          |
|                  | Gene.130327::c23136_BT_Eu_ru_202_g1_i1::g.130327:m.130327 | 0.62   | 0.00  | NO  |          |
|                  | Gene.134195::c28561_BT_Eu_ru_202_g1_i1::g.134195:m.134195 | 0.51   | 0.61  | NO  |          |
|                  | Gene.163397::c55273_BT_Eu_ru_202_g1_i1::g.163397:m.163397 | 0.43   | 0.86  | NO  |          |
|                  | Gene.165245::c56843_BT_Eu_ru_202_g1_i1::g.165245:m.165245 | 0.44   | 0.00  | NO  |          |
|                  | Gene.124197::c17389_BT_Eu_ru_202_g1_i1::g.124197:m.124197 | 0.59   | 1.46  | NO  |          |
|                  | Gene.140251::c33458_BT_Eu_ru_202_g1_i1::g.140251:m.140251 | 0.67   | 0.00  | NO  |          |
|                  | Gene.153751::c46275_BT_Eu_ru_202_g1_i1::g.153751:m.153751 | 0.74   | 2.70  | NO  |          |
|                  | Gene.159059::c51469_BT_Eu_ru_202_g1_i1::g.159059:m.159059 | 0.58   | 1.38  | NO  |          |
|                  | Gene.167517::c59466_BT_Eu_ru_202_g1_i1::g.167517:m.167517 | 0.49   | 0.89  | NO  |          |
|                  | Gene.121290::c13899_BT_Eu_ru_202_g1_i1::g.121290:m.121290 | 0.41   | 2.04  | NO  |          |
|                  | Gene.123780::c16730_BT_Eu_ru_202_g1_i1::g.123780:m.123780 | 0.39   | 1.78  | NO  |          |
|                  | Gene.125447::c19516_BT_Eu_ru_202_g1_i1::g.125447:m.125447 | 0.58   | 10.14 | NO  |          |
|                  | Gene.129207::c22104_BT_Eu_ru_202_g1_i1::g.129207:m.129207 | 0.51   | 1.87  | NO  |          |
|                  | Gene.139468::c32476_BT_Eu_ru_202_g1_i1::g.139468:m.139468 | 0.59   | 0.00  | NO  |          |
|                  | Gene.140373::c33640_BT_Eu_ru_202_g1_i1::g.140373:m.140373 | 0.40   | 0.93  | NO  |          |
|                  | Gene.140471::c33776_BT_Eu_ru_202_g1_i1::g.140471:m.140471 | 0.46   | 1.38  | NO  |          |
|                  | Gene.143665::c36719_BT_Eu_ru_202_g1_i1::g.143665:m.143665 | 0.44   | 1.18  | NO  |          |
|                  | Gene.145757::c37970_BT_Eu_ru_202_g1_i1::g.145757:m.145757 | 0.47   | 1.46  | NO  |          |
|                  | Gene.149135::c41430_BT_Eu_ru_202_g1_i1::g.149135:m.149135 | 0.45   | 2.61  | NO  |          |
|                  | Gene.149221::c41529_BT_Eu_ru_202_g1_i1::g.149221:m.149221 | 0.42   | 0.00  | NO  |          |
|                  | Gene.158880::c51213_BT_Eu_ru_202_g1_i1::g.158880:m.158880 | 0.36   | 0.00  | NO  |          |
|                  | Gene.167050::c58867_BT_Eu_ru_202_g1_i1::g.167050:m.167050 | 0.56   | 0.00  | NO  |          |
|                  | Gene.124720::c18226_BT_Eu_ru_202_g1_i1::g.124720:m.124720 | 0.37   | 0.00  | NO  |          |
|                  | Gene.130674::c23504_BT_Eu_ru_202_g1_i1::g.130674:m.130674 | 0.35   | 1.46  | NO  |          |
|                  | Gene.137405::c30454_BT_Eu_ru_202_g1_i1::g.137405:m.137405 | 0.38   | 3.50  | NO  |          |
|                  | Gene.141672::c35879_BT_Eu_ru_202_g1_i1::g.141672:m.141672 | 0.36   | 0.00  | NO  |          |
|                  | Gene.148114::c40198_BT_Eu_ru_202_g1_i1::g.148114:m.148114 | 0.38   | 0.00  | NO  |          |
|                  | Gene.157903::c49925_BT_Eu_ru_202_g1_i1::g.157903:m.157903 | 0.40   | 2.10  | NO  |          |
|                  | Gene.166150::c57816_BT_Eu_ru_202_g1_i1::g.166150:m.166150 | 0.39   | 1.99  | NO  |          |
|                  | Gene.140669::c34065_BT_Eu_ru_202_g1_i1::g.140669:m.140669 | 0.28   | 0.00  | NO  |          |
|                  | Gene.4964::c1184_BT_Eu_ru_202_g1_i2::g.4964:m.4964        | 0.14   | 0.00  | NO  |          |
| Phospholipase A2 | Gene.21162::c4635_BT_Eu_ru_202_g1_i1::g.21162:m.21162     | 13.46  | 10.87 | NO  | excluded |
|                  | Gene.118557::c11832_BT_Eu_ru_202_g1_i1::g.118557:m.118557 | 15.96  | 11.68 | NO  |          |
|                  | Gene.13732::c3278_BT_Eu_ru_202_g1_i1::g.13732:m.13732     | 13.10  | 9.37  | NO  |          |
|                  | Gene.53896::c7848_BT_Eu_ru_202_g1_i1::g.53896:m.53896     | 6.02   | 0.38  | YES |          |
|                  | Gene.36007::c6436_BT_Eu_ru_202_g1_i1::g.36007:m.36007     | 6.64   | 6.03  | YES |          |
|                  | Gene.53905::c7848_BT_Eu_ru_202_g1_i2::g.53905:m.53905     | 4.49   | 3.67  | NO  |          |
|                  | Gene.8870::c2162_BT_Eu_ru_202_g1_i1::g.8870:m.8870        | 2.04   | 1.21  | YES |          |
|                  | Gene.148845::c41066_BT_Eu_ru_202_g1_i1::g.148845:m.148845 | 0.65   | 0.37  | NO  |          |
| Pimplin          | Gene.15431::c3670_BT_Eu_ru_202_g1_i1::g.15431:m.15431     | 4.70   | 2.57  | NO  |          |
|                  | Gene.147588::c39679_BT_Eu_ru_202_g1_i1::g.147588:m.147588 | 0.89   | 0.51  | NO  |          |
| Serpin           | Gene.117173::c11138_BT_Eu_ru_202_g1_i1::g.117173:m.117173 | 132.77 | 87.84 | NO  |          |
|                  | Gene.74626::c9077_BT_Eu_ru_202_g1_i1::g.74626:m.74626     | 124.97 | 66.53 | YES |          |
|                  | Gene.53257::c7797_BT_Eu_ru_202_g1_i1::g.53257:m.53257     | 124.34 | 83.54 | YES |          |
|                  | Gene.47147::c7365_BT_Eu_ru_202_g1_i3::g.47147:m.47147     | 65.37  | 27.21 | YES |          |
|                  | Gene.50941::c7638_BT_Eu_ru_202_g1_i2::g.50941:m.50941     | 78.74  | 17.66 | NO  |          |
|                  | Gene.47158::c7365_BT_Eu_ru_202_g1_i4::g.47158:m.47158     | 62.95  | 4.78  | YES |          |
|                  | Gene.50951::c7638_BT_Eu_ru_202_g1_i5::g.50951:m.50951     | 87.13  | 6.52  | YES |          |
|                  | Gene.50949::c7638_BT_Eu_ru_202_g1_i4::g.50949:m.50949     | 86.50  | 15.00 | YES |          |
|                  | Gene.50938::c7638_BT_Eu_ru_202_g1_i1::g.50938:m.50938     | 86.61  | 10.92 | YES |          |
|                  | Gene.50945::c7638_BT_Eu_ru_202_g1_i3::g.50945:m.50945     | 86.09  | 4.65  | YES |          |
|                  | Gene.153730::c46265_BT_Eu_ru_202_g1_i1::g.153730:m.153730 | 66.70  | 44.47 | NO  |          |
|                  | Gene.47139::c7365_BT_Eu_ru_202_g1_i2::g.47139:m.47139     | 63.26  | 12.14 | YES |          |
|                  | Gene.143683::c36728_BT_Eu_ru_202_g1_i1::g.143683:m.143683 | 51.04  | 31.39 | NO  |          |
|                  | Gene.87745::c9609_BT_Eu_ru_202_g1_i1::g.87745:m.87745     | 20.23  | 11.68 | YES |          |
|                  | Gene.9330::c2227_BT_Eu_ru_202_g1_i1::g.9330:m.9330        | 30.34  | 20.17 | YES |          |
|                  | Gene.49370::c7535_BT_Eu_ru_202_g1_i1::g.49370:m.49370     | 34.05  | 19.67 | NO  |          |
|                  | Gene.47133::c7365_BT_Eu_ru_202_g1_i1::g.47133:m.47133     | 56.91  | 11.28 | NO  |          |
|                  | Gene.49369::c7535_BT_Eu_ru_202_g1_i1::g.49369:m.49369     | 20.13  | 6.19  | YES |          |
|                  | Gene.49377::c7535_BT_Eu_ru_202_g1_i2::g.49377:m.49377     | 20.13  | 6.19  | YES |          |
|                  | Gene.27785::c5547_BT_Eu_ru_202_g1_i1::g.27785:m.27785     | 17.86  | 11.97 | NO  |          |
|                  | Gene.4319::c1024_BT_Eu_ru_202_g1_i1::g.4319:m.4319        | 15.77  | 9.98  | NO  |          |
|                  | Gene.49378::c7535_BT_Eu_ru_202_g1_i2::g.49378:m.49378     | 26.23  | 5.54  | NO  |          |
|                  | Gene.71064::c8881_BT_Eu_ru_202_g1_i2::g.71064:m.71064     | 11.58  | 7.55  | NO  |          |
|                  | Gene.6529::c1569_BT_Eu_ru_202_g1_i1::g.6529:m.6529        | 11.90  | 9.07  | NO  |          |
|                  | Gene.8835::c2154_BT_Eu_ru_202_g1_i2::g.8835:m.8835        | 11.08  | 8.00  | YES |          |
|                  | Gene.28797::c5677_BT_Eu_ru_202_g1_i1::g.28797:m.28797     | 5.11   | 3.05  | YES |          |
|                  | Gene.8831::c2154_BT_Eu_ru_202_g1_i1::g.8831:m.8831        | 11.06  | 0.00  | YES |          |
|                  | Gene.2489::c596_BT_Eu_ru_202_g1_i1::g.2489:m.2489         | 6.51   | 4.47  | YES |          |
|                  | Gene.49136::c7520_BT_Eu_ru_202_g1_i1::g.49136:m.49136     | 5.02   | 3.01  | YES |          |
|                  | Gene.49371::c7535_BT_Eu_ru_202_g1_i1::g.49371:m.49371     | 18.83  | 17.75 | NO  |          |
|                  | Gene.17451::c4135_BT_Eu_ru_202_g2_i1::g.17451:m.17451     | 2.83   | 1.51  | NO  |          |
|                  | Gene.50947::c7638_BT_Eu_ru_202_g1_i3::g.50947:m.50947     | 8.59   | 6.90  | NO  |          |
|                  | Gene.27790::c5547_BT_Eu_ru_202_g1_i2::g.27790:m.27790     | 6.51   | 3.18  | NO  |          |
|                  | Gene.2496::c596_BT_Eu_ru_202_g1_i2::g.2496:m.2496         | 4.45   | 0.00  | NO  |          |
|                  | Gene.158215::c50315_BT_Eu_ru_202_g1_i1::g.158215:m.158215 | 4.30   | 8.44  | NO  |          |
|                  | Gene.2633::c636_BT_Eu_ru_202_g1_i1::g.2633:m.2633         | 5.08   | 20.45 | NO  |          |
|                  | Gene.1383::c309_BT_Eu_ru_202_g1_i2::g.1383:m.1383         | 3.83   | 9.67  | NO  |          |
|                  | Gene.15132::c3598_BT_Eu_ru_202_g1_i1::g.15132:m.15132     | 3.77   | 12.25 | NO  |          |
|                  | Gene.17448::c4135_BT_Eu_ru_202_g1_i1::g.17448:m.17448     | 1.70   | 3.17  | NO  |          |
|                  | Gene.16594::c4019_BT_Eu_ru_202_g1_i1::g.16594:m.16594     | 2.71   | 6.58  | NO  |          |
|                  | Gene.16595::c4019_BT_Eu_ru_202_g1_i2::g.16595:m.16595     | 2.71   | 6.58  | NO  |          |
|                  | Gene.17459::c4135_BT_Eu_ru_202_g1_i2::g.17459:m.17459     | 0.97   | 0.00  | NO  |          |
|                  | Gene.10602::c2529_BT_Eu_ru_202_g1_i1::g.10602:m.10602     | 1.23   | 8.23  | NO  |          |
|                  | Gene.157982::c50027_BT_Eu_ru_202_g1_i1::g.157982:m.157982 | 0.77   | 0.00  | NO  |          |
|                  | Gene.1381::c309_BT_Eu_ru_202_g1_i1::g.1381:m.1381         | 0.57   | 0.00  | NO  |          |
|                  | Gene.123282::c16109_BT_Eu_ru_202_g1_i1::g.123282:m.123282 | 0.41   | 0.97  | NO  |          |
|                  | Gene.123405::c16238_BT_Eu_ru_202_g1_i1::g.123405:m.123405 | 0.46   | 0.00  | NO  |          |
| Sphingomyelinase | Gene.10413::c2468_BT_Eu_ru_202_g1_i1::g.10413:m.10413     | 173.43 | 98.23 | NO  |          |
|                  | Gene.73130::c8983_BT_Eu_ru_202_g1_i1::g.73130:m.73130     | 25.66  | 13.87 | YES |          |
|                  | Gene.96649::c9956_BT_Eu_ru_202_g1_i1::g.96649:m.96649     | 21.53  | 11.79 | YES |          |
|                  | Gene.14533::c3451_BT_Eu_ru_202_g1_i1::g.14533:m.14533     | 25.38  | 16.60 | YES |          |
|                  | Gene.10716::c2561_BT_Eu_ru_202_g1_i1::g.10716:m.10716     | 3.00   | 1.65  | NO  |          |

|                             |                                                            |       |       |     |  |
|-----------------------------|------------------------------------------------------------|-------|-------|-----|--|
| SVWC-domain 1 (Asilidin8)   | Gene.118129::c11590_BT_Eu_ru_202_g1_i1::g.118129::m.118129 | 4.63  | 6.47  | NO  |  |
|                             | Gene.128250::c21369_BT_Eu_ru_202_g1_i1::g.128250::m.128250 | 4.57  | 7.73  | NO  |  |
| SVWC-domain 2 (Asilidin9)   | Gene.160399::c53785_BT_Eu_ru_202_g1_i1::g.160399::m.160399 | 33.40 | 33.55 | NO  |  |
|                             | Gene.152506::c45649_BT_Eu_ru_202_g1_i1::g.152506::m.152506 | 28.25 | 33.24 | NO  |  |
|                             | Gene.119101::c12130_BT_Eu_ru_202_g1_i1::g.119101::m.119101 | 26.01 | 33.58 | NO  |  |
| Venom acid phosphatase-like | Gene.52327::c7742_BT_Eu_ru_202_g1_i1::g.52327::m.52327     | 21.84 | 15.09 | YES |  |
|                             | Gene.94951::c9898_BT_Eu_ru_202_g1_i2::g.94951::m.94951     | 20.40 | 5.54  | NO  |  |
|                             | Gene.94957::c9898_BT_Eu_ru_202_g1_i3::g.94957::m.94957     | 20.40 | 5.54  | NO  |  |
|                             | Gene.94945::c9898_BT_Eu_ru_202_g1_i1::g.94945::m.94945     | 18.72 | 2.20  | NO  |  |
|                             | Gene.94944::c9898_BT_Eu_ru_202_g1_i1::g.94944::m.94944     | 16.11 | 0.99  | NO  |  |
|                             | Gene.91784::c9775_BT_Eu_ru_202_g2_i1::g.91784::m.91784     | 5.96  | 3.58  | NO  |  |
|                             | Gene.32451::c6099_BT_Eu_ru_202_g1_i1::g.32451::m.32451     | 1.82  | 1.30  | YES |  |
|                             |                                                            |       |       |     |  |
