# Supplementary material for: A Dipteran’s Novel Sucker Punch: Evolution of Arthropod Atypical Venom with a Neurotoxic Component in Robber Flies (Asilidae, Diptera)
Source: MDPI journal article supplement (doi:10.3390/toxins10010029), 2018-01-05
Supplement: s1 [file s1]

| Protein Class                | Contig ID                                                                                                                                                                                                                                                                                                                                                                                                                                                                                                                                                                                                                                                                                                                                                                                                                                                                                                                                                                                                                                                                                                                                                                                                                                                                                                                                                                                                                                                                                                                                                                                                                                                                                                                                                        | TPM - Segemehl                                                                                                                                                                                                                                          | TPM - Kallisto                                                                                                                                                                                                                                    | Signal Peptide                                                                                                                                                                   | false positive                                                                                                                                                                                       |
|------------------------------|------------------------------------------------------------------------------------------------------------------------------------------------------------------------------------------------------------------------------------------------------------------------------------------------------------------------------------------------------------------------------------------------------------------------------------------------------------------------------------------------------------------------------------------------------------------------------------------------------------------------------------------------------------------------------------------------------------------------------------------------------------------------------------------------------------------------------------------------------------------------------------------------------------------------------------------------------------------------------------------------------------------------------------------------------------------------------------------------------------------------------------------------------------------------------------------------------------------------------------------------------------------------------------------------------------------------------------------------------------------------------------------------------------------------------------------------------------------------------------------------------------------------------------------------------------------------------------------------------------------------------------------------------------------------------------------------------------------------------------------------------------------|---------------------------------------------------------------------------------------------------------------------------------------------------------------------------------------------------------------------------------------------------------|---------------------------------------------------------------------------------------------------------------------------------------------------------------------------------------------------------------------------------------------------|----------------------------------------------------------------------------------------------------------------------------------------------------------------------------------|------------------------------------------------------------------------------------------------------------------------------------------------------------------------------------------------------|
| <b>Aegyptin</b>              | Gene.35590::c8084_BT_Ma_ar_201_g1_i3::g.35590::m.35590                                                                                                                                                                                                                                                                                                                                                                                                                                                                                                                                                                                                                                                                                                                                                                                                                                                                                                                                                                                                                                                                                                                                                                                                                                                                                                                                                                                                                                                                                                                                                                                                                                                                                                           | 26.87                                                                                                                                                                                                                                                   | 18.80                                                                                                                                                                                                                                             | NO                                                                                                                                                                               | only body tissue                                                                                                                                                                                     |
| <b>Alpha-amylase</b>         | Gene.9814::c3546_BT_Ma_ar_201_g1_i1::g.9814::m.9814                                                                                                                                                                                                                                                                                                                                                                                                                                                                                                                                                                                                                                                                                                                                                                                                                                                                                                                                                                                                                                                                                                                                                                                                                                                                                                                                                                                                                                                                                                                                                                                                                                                                                                              | 67.28                                                                                                                                                                                                                                                   | 37.91                                                                                                                                                                                                                                             | YES                                                                                                                                                                              |                                                                                                                                                                                                      |
| <b>Anophelin</b>             | no hit                                                                                                                                                                                                                                                                                                                                                                                                                                                                                                                                                                                                                                                                                                                                                                                                                                                                                                                                                                                                                                                                                                                                                                                                                                                                                                                                                                                                                                                                                                                                                                                                                                                                                                                                                           | 0                                                                                                                                                                                                                                                       | 0                                                                                                                                                                                                                                                 | X                                                                                                                                                                                |                                                                                                                                                                                                      |
| <b>Apyrase</b>               | Gene.7895::c2798_BT_Ma_ar_201_g1_i1::g.7895::m.7895<br>Gene.51259::c9670_BT_Ma_ar_201_g1_i2::g.51259::m.51259<br>Gene.106645::c12823_BT_Ma_ar_201_g1_i2::g.106645::m.106645<br>Gene.106641::c12823_BT_Ma_ar_201_g1_i1::g.106641::m.106641<br>Gene.51253::c9670_BT_Ma_ar_201_g1_i1::g.51253::m.51253<br>Gene.106652::c12823_BT_Ma_ar_201_g1_i3::g.106652::m.106652<br>Gene.106655::c12823_BT_Ma_ar_201_g1_i4::g.106655::m.106655<br>Gene.154379::c55460_BT_Ma_ar_201_g1_i1::g.154379::m.154379<br>Gene.148940::c49510_BT_Ma_ar_201_g1_i1::g.148940::m.148940<br>Gene.111936::c14279_BT_Ma_ar_201_g1_i1::g.111936::m.111936                                                                                                                                                                                                                                                                                                                                                                                                                                                                                                                                                                                                                                                                                                                                                                                                                                                                                                                                                                                                                                                                                                                                        | 21.59<br>14.43<br>16.35<br>15.97<br>14.59<br>9.14<br>8.34<br>1.78<br>1.79<br>1.55                                                                                                                                                                       | 11.43<br>6.41<br>9.05<br>0.00<br>2.72<br>3.95<br>2.63<br>1.38<br>1.04<br>1.07                                                                                                                                                                     | YES<br>NO<br>NO<br>NO<br>NO<br>NO<br>NO<br>NO<br>NO<br>NO                                                                                                                        | only body tissue<br>only body tissue |
| <b>CAP</b>                   | Gene.32398::c7699_BT_Ma_ar_201_g1_i1::g.32398::m.32398<br>Gene.65498::c10811_BT_Ma_ar_201_g1_i1::g.65498::m.65498<br>Gene.44599::c9047_BT_Ma_ar_201_g1_i1::g.44599::m.44599<br>Gene.69514::c11120_BT_Ma_ar_201_g1_i2::g.69514::m.69514<br>Gene.60081::c10434_BT_Ma_ar_201_g1_i1::g.60081::m.60081<br>Gene.45568::c9142_BT_Ma_ar_201_g1_i1::g.45568::m.45568<br>Gene.17547::c5350_BT_Ma_ar_201_g1_i1::g.17547::m.17547<br>Gene.44268::c9020_BT_Ma_ar_201_g1_i2::g.44268::m.44268<br>Gene.17550::c5350_BT_Ma_ar_201_g1_i2::g.17550::m.17550<br>Gene.35207::c8036_BT_Ma_ar_201_g1_i1::g.35207::m.35207<br>Gene.45575::c9142_BT_Ma_ar_201_g1_i2::g.45575::m.45575<br>Gene.69522::c11120_BT_Ma_ar_201_g1_i4::g.69522::m.69522<br>Gene.33726::c7866_BT_Ma_ar_201_g1_i1::g.33726::m.33726<br>Gene.69511::c11120_BT_Ma_ar_201_g1_i1::g.69511::m.69511<br>Gene.69518::c11120_BT_Ma_ar_201_g1_i3::g.69518::m.69518<br>Gene.45576::c9142_BT_Ma_ar_201_g1_i2::g.45576::m.45576<br>Gene.25302::c6709_BT_Ma_ar_201_g1_i1::g.25302::m.25302<br>Gene.44263::c9020_BT_Ma_ar_201_g1_i1::g.44263::m.44263<br>Gene.35124::c8028_BT_Ma_ar_201_g1_i1::g.35124::m.35124<br>Gene.30113::c7405_BT_Ma_ar_201_g1_i1::g.30113::m.30113<br>Gene.10594::c3877_BT_Ma_ar_201_g1_i1::g.10594::m.10594<br>Gene.35878::c8121_BT_Ma_ar_201_g1_i2::g.35878::m.35878<br>Gene.35876::c8121_BT_Ma_ar_201_g1_i1::g.35876::m.35876<br>Gene.35885::c8121_BT_Ma_ar_201_g1_i4::g.35885::m.35885<br>Gene.109742::c12982_BT_Ma_ar_201_g1_i1::g.109742::m.109742<br>Gene.35879::c8121_BT_Ma_ar_201_g1_i2::g.35879::m.35879<br>Gene.35886::c8121_BT_Ma_ar_201_g1_i4::g.35886::m.35886<br>Gene.119744::c22063_BT_Ma_ar_201_g1_i1::g.119744::m.119744<br>Gene.117277::c19556_BT_Ma_ar_201_g1_i1::g.117277::m.117277 | 283.74<br>194.01<br>48.28<br>29.93<br>32.19<br>25.34<br>34.76<br>33.17<br>36.95<br>29.86<br>25.30<br>28.59<br>7.26<br>26.07<br>26.07<br>20.02<br>10.29<br>20.86<br>9.09<br>4.51<br>3.92<br>3.99<br>4.15<br>3.79<br>1.83<br>3.82<br>3.82<br>1.84<br>1.37 | 195.85<br>159.23<br>39.76<br>15.67<br>22.04<br>11.66<br>11.00<br>24.79<br>14.76<br>36.95<br>9.91<br>0.25<br>5.22<br>2.54<br>2.54<br>6.02<br>8.36<br>17.63<br>9.57<br>3.10<br>3.51<br>2.33<br>1.89<br>0.45<br>1.56<br>1.31<br>1.31<br>1.66<br>5.48 | YES<br>NO<br>YES<br>YES<br>YES<br>YES<br>NO<br>YES<br>NO<br>NO<br>NO<br>NO<br>NO<br>NO<br>NO<br>YES<br>YES<br>NO<br>NO<br>YES<br>YES<br>YES<br>YES<br>NO<br>NO<br>NO<br>NO<br>NO |                                                                                                                                                                                                      |
| <b>Chitinase</b>             | Gene.68467::c11045_BT_Ma_ar_201_g1_i1::g.68467::m.68467<br>Gene.126092::c28349_BT_Ma_ar_201_g1_i1::g.126092::m.126092<br>Gene.61049::c10500_BT_Ma_ar_201_g1_i1::g.61049::m.61049<br>Gene.21292::c6130_BT_Ma_ar_201_g1_i2::g.21292::m.21292<br>Gene.71611::c11272_BT_Ma_ar_201_g1_i1::g.71611::m.71611<br>Gene.42602::c8854_BT_Ma_ar_201_g1_i1::g.42602::m.42602<br>Gene.6621::c2322_BT_Ma_ar_201_g1_i1::g.6621::m.6621<br>Gene.34774::c7976_BT_Ma_ar_201_g1_i1::g.34774::m.34774<br>Gene.10135::c3691_BT_Ma_ar_201_g1_i1::g.10135::m.10135<br>Gene.1980::c719_BT_Ma_ar_201_g1_i2::g.1980::m.1980<br>Gene.1978::c719_BT_Ma_ar_201_g1_i1::g.1978::m.1978<br>Gene.112317::c14520_BT_Ma_ar_201_g1_i1::g.112317::m.112317<br>Gene.158491::c59413_BT_Ma_ar_201_g1_i1::g.158491::m.158491<br>Gene.123002::c24503_BT_Ma_ar_201_g1_i1::g.123002::m.123002<br>Gene.114454::c16306_BT_Ma_ar_201_g1_i1::g.114454::m.114454<br>Gene.156890::c57547_BT_Ma_ar_201_g1_i1::g.156890::m.156890<br>Gene.125405::c27564_BT_Ma_ar_201_g1_i1::g.125405::m.125405<br>Gene.141591::c42844_BT_Ma_ar_201_g1_i1::g.141591::m.141591                                                                                                                                                                                                                                                                                                                                                                                                                                                                                                                                                                                                                                                         | 866.74<br>380.80<br>81.08<br>13.29<br>9.28<br>5.94<br>3.06<br>3.48<br>2.68<br>1.57<br>1.72<br>1.07<br>0.78<br>0.73<br>0.49<br>0.82<br>0.58<br>0.39                                                                                                      | 532.55<br>219.38<br>49.87<br>8.32<br>5.64<br>4.39<br>1.47<br>1.78<br>1.35<br>0.49<br>0.90<br>1.07<br>0.80<br>0.68<br>1.61<br>10.30<br>4.82<br>0.00                                                                                                | YES<br>NO<br>YES<br>NO<br>YES<br>YES<br>NO<br>NO<br>YES<br>NO<br>NO<br>NO<br>NO<br>NO<br>NO<br>NO<br>NO<br>NO<br>NO                                                              |                                                                                                                                                                                                      |
| <b>Conoposin-like</b>        | no hit                                                                                                                                                                                                                                                                                                                                                                                                                                                                                                                                                                                                                                                                                                                                                                                                                                                                                                                                                                                                                                                                                                                                                                                                                                                                                                                                                                                                                                                                                                                                                                                                                                                                                                                                                           | 0                                                                                                                                                                                                                                                       | 0                                                                                                                                                                                                                                                 | X                                                                                                                                                                                |                                                                                                                                                                                                      |
| <b>Csalpha/beta defensin</b> | Gene.126225::c28400_BT_Ma_ar_201_g1_i1::g.126225::m.126225<br>Gene.18244::c5472_BT_Ma_ar_201_g1_i1::g.18244::m.18244<br>Gene.13246::c4500_BT_Ma_ar_201_g1_i1::g.13246::m.13246<br>Gene.38644::c8442_BT_Ma_ar_201_g1_i1::g.38644::m.38644<br>Gene.38650::c8442_BT_Ma_ar_201_g1_i2::g.38650::m.38650<br>Gene.8269::c2974_BT_Ma_ar_201_g1_i1::g.8269::m.8269<br>Gene.112706::c14796_BT_Ma_ar_201_g1_i1::g.112706::m.112706<br>Gene.4719::c1678_BT_Ma_ar_201_g1_i1::g.4719::m.4719<br>Gene.146578::c47347_BT_Ma_ar_201_g1_i1::g.146578::m.146578                                                                                                                                                                                                                                                                                                                                                                                                                                                                                                                                                                                                                                                                                                                                                                                                                                                                                                                                                                                                                                                                                                                                                                                                                     | 5810.80<br>612.87<br>33.84<br>20.91<br>20.91<br>10.05<br>4.84<br>3.44<br>0.42                                                                                                                                                                           | 13218.60<br>508.65<br>58.88<br>7.75<br>7.75<br>17.75<br>9.13<br>11.19<br>0.94                                                                                                                                                                     | NO<br>NO<br>YES<br>YES<br>YES<br>YES<br>NO<br>YES<br>NO                                                                                                                          |                                                                                                                                                                                                      |
| <b>Cystatin</b>              | no hit                                                                                                                                                                                                                                                                                                                                                                                                                                                                                                                                                                                                                                                                                                                                                                                                                                                                                                                                                                                                                                                                                                                                                                                                                                                                                                                                                                                                                                                                                                                                                                                                                                                                                                                                                           | 0                                                                                                                                                                                                                                                       | 0                                                                                                                                                                                                                                                 | X                                                                                                                                                                                |                                                                                                                                                                                                      |
| <b>dICK's</b>                | Gene.122719::c24236_BT_Ma_ar_201_g1_i1::g.122719::m.122719<br>Gene.113514::c15452_BT_Ma_ar_201_g1_i1::g.113514::m.113514                                                                                                                                                                                                                                                                                                                                                                                                                                                                                                                                                                                                                                                                                                                                                                                                                                                                                                                                                                                                                                                                                                                                                                                                                                                                                                                                                                                                                                                                                                                                                                                                                                         | 73.93<br>1.58                                                                                                                                                                                                                                           | 68.95<br>1.03                                                                                                                                                                                                                                     | NO<br>NO                                                                                                                                                                         |                                                                                                                                                                                                      |
| <b>Disintegrin-like</b>      | no hit                                                                                                                                                                                                                                                                                                                                                                                                                                                                                                                                                                                                                                                                                                                                                                                                                                                                                                                                                                                                                                                                                                                                                                                                                                                                                                                                                                                                                                                                                                                                                                                                                                                                                                                                                           | 0                                                                                                                                                                                                                                                       | 0                                                                                                                                                                                                                                                 | X                                                                                                                                                                                |                                                                                                                                                                                                      |
| <b>Echotoxin-like</b>        | no hit                                                                                                                                                                                                                                                                                                                                                                                                                                                                                                                                                                                                                                                                                                                                                                                                                                                                                                                                                                                                                                                                                                                                                                                                                                                                                                                                                                                                                                                                                                                                                                                                                                                                                                                                                           | 0                                                                                                                                                                                                                                                       | 0                                                                                                                                                                                                                                                 | X                                                                                                                                                                                |                                                                                                                                                                                                      |
| <b>Gigantoxin-like</b>       | no hit                                                                                                                                                                                                                                                                                                                                                                                                                                                                                                                                                                                                                                                                                                                                                                                                                                                                                                                                                                                                                                                                                                                                                                                                                                                                                                                                                                                                                                                                                                                                                                                                                                                                                                                                                           | 0                                                                                                                                                                                                                                                       | 0                                                                                                                                                                                                                                                 | X                                                                                                                                                                                |                                                                                                                                                                                                      |

|                      |                                                            |         |         |     |          |
|----------------------|------------------------------------------------------------|---------|---------|-----|----------|
| Hyaluronidase        | Gene.13911::c4644_BT_Ma_ar_201_g1_i1::g.13911::m.13911     | 2.23    | 1.41    | NO  |          |
|                      | Gene.1639::c579_BT_Ma_ar_201_g1_i1::g.1639::m.1639         | 1.62    | 3.29    | YES |          |
| ICK's (Asilidin1)    | Gene.16040::c5071_BT_Ma_ar_201_g1_i1::g.16040::m.16040     | 2326.43 | 7803.10 | YES |          |
|                      | Gene.12953::c4441_BT_Ma_ar_201_g1_i1::g.12953::m.12953     | 479.35  | 1604.17 | YES |          |
|                      | Gene.128574::c29838_BT_Ma_ar_201_g1_i1::g.128574::m.128574 | 419.49  | 456.09  | NO  |          |
|                      | Gene.2374::c871_BT_Ma_ar_201_g1_i1::g.2374::m.2374         | 170.09  | 194.77  | YES |          |
|                      | Gene.122719::c24236_BT_Ma_ar_201_g1_i1::g.122719::m.122719 | 73.93   | 68.95   | NO  |          |
|                      | Gene.135785::c37503_BT_Ma_ar_201_g1_i1::g.135785::m.135785 | 125.60  | 134.72  | NO  |          |
|                      | Gene.112576::c14699_BT_Ma_ar_201_g1_i1::g.112576::m.112576 | 20.09   | 71.40   | NO  |          |
|                      | Gene.4789::c1710_BT_Ma_ar_201_g1_i1::g.4789::m.4789        | 12.65   | 25.53   | YES |          |
|                      | Gene.47439::c9321_BT_Ma_ar_201_g1_i1::g.47439::m.47439     | 6.26    | 8.22    | NO  |          |
|                      | Gene.124527::c26203_BT_Ma_ar_201_g1_i1::g.124527::m.124527 | 6.14    | 8.75    | NO  |          |
|                      | Gene.7265::c2557_BT_Ma_ar_201_g1_i1::g.7265::m.7265        | 3.24    | 3.87    | NO  |          |
|                      | Gene.113514::c15452_BT_Ma_ar_201_g1_i1::g.113514::m.113514 | 1.58    | 1.03    | NO  |          |
|                      | Gene.117389::c19695_BT_Ma_ar_201_g1_i1::g.117389::m.117389 | 0.69    | 0.47    | NO  |          |
|                      | Gene.132650::c33743_BT_Ma_ar_201_g1_i1::g.132650::m.132650 | 0.68    | 1.99    | NO  |          |
| Kazal                | Gene.119253::c21798_BT_Ma_ar_201_g1_i1::g.119253::m.119253 | 962.17  | 2577.36 | NO  |          |
|                      | Gene.45586::c9144_BT_Ma_ar_201_g1_i1::g.45586::m.45586     | 172.27  | 213.35  | YES |          |
|                      | Gene.60316::c10447_BT_Ma_ar_201_g1_i1::g.60316::m.60316    | 44.96   | 28.08   | YES | excluded |
|                      | Gene.95966::c12490_BT_Ma_ar_201_g1_i1::g.95966::m.95966    | 17.14   | 5.35    | NO  | excluded |
|                      | Gene.95973::c12490_BT_Ma_ar_201_g1_i2::g.95973::m.95973    | 17.05   | 2.29    | NO  | excluded |
|                      | Gene.95981::c12490_BT_Ma_ar_201_g1_i3::g.95981::m.95981    | 17.05   | 2.29    | NO  | excluded |
|                      | Gene.110960::c13633_BT_Ma_ar_201_g1_i1::g.110960::m.110960 | 124.24  | 238.93  | NO  |          |
|                      | Gene.77823::c11638_BT_Ma_ar_201_g1_i1::g.77823::m.77823    | 8.55    | 4.93    | YES | excluded |
|                      | Gene.33349::c7815_BT_Ma_ar_201_g1_i1::g.33349::m.33349     | 8.67    | 4.76    | NO  | excluded |
|                      | Gene.33342::c7813_BT_Ma_ar_201_g1_i1::g.33342::m.33342     | 29.78   | 27.23   | YES |          |
|                      | Gene.9490::c3418_BT_Ma_ar_201_g1_i1::g.9490::m.9490        | 4.97    | 3.15    | NO  | excluded |
|                      | Gene.122601::c24133_BT_Ma_ar_201_g1_i1::g.122601::m.122601 | 15.34   | 34.33   | NO  |          |
|                      | Gene.13259::c4505_BT_Ma_ar_201_g1_i1::g.13259::m.13259     | 21.20   | 49.84   | NO  |          |
|                      | Gene.2123::c786_BT_Ma_ar_201_g1_i1::g.2123::m.2123         | 2.11    | 0.96    | NO  | excluded |
|                      | Gene.122644::c24170_BT_Ma_ar_201_g1_i1::g.122644::m.122644 | 2.44    | 1.61    | NO  |          |
|                      | Gene.41579::c8751_BT_Ma_ar_201_g1_i1::g.41579::m.41579     | 5.52    | 3.02    | NO  |          |
|                      | Gene.153697::c55024_BT_Ma_ar_201_g1_i1::g.153697::m.153697 | 1.87    | 1.39    | NO  | excluded |
|                      | Gene.146547::c47332_BT_Ma_ar_201_g1_i1::g.146547::m.146547 | 1.04    | 0.51    | NO  |          |
|                      | Gene.5220::c1883_BT_Ma_ar_201_g1_i1::g.5220::m.5220        | 0.81    | 0.87    | YES |          |
|                      | Gene.141617::c42878_BT_Ma_ar_201_g1_i1::g.141617::m.141617 | 1.00    | 4.54    | NO  |          |
| Kazal (vasotab-like) | Gene.13474::c4555_BT_Ma_ar_201_g1_i1::g.13474::m.13474     | 2766.76 | 1977.82 | YES |          |
|                      | Gene.41010::c8683_BT_Ma_ar_201_g1_i1::g.41010::m.41010     | 190.55  | 82.07   | YES | excluded |
|                      | Gene.41028::c8683_BT_Ma_ar_201_g1_i2::g.41028::m.41028     | 184.44  | 17.79   | YES | excluded |
|                      | Gene.53030::c9832_BT_Ma_ar_201_g1_i1::g.53030::m.53030     | 432.14  | 382.44  | YES |          |
|                      | Gene.13787::c4617_BT_Ma_ar_201_g1_i1::g.13787::m.13787     | 373.55  | 291.47  | YES |          |
|                      | Gene.29335::c7299_BT_Ma_ar_201_g1_i1::g.29335::m.29335     | 331.64  | 890.92  | YES |          |
|                      | Gene.128714::c29944_BT_Ma_ar_201_g1_i1::g.128714::m.128714 | 205.08  | 389.38  | NO  |          |
|                      | Gene.28504::c7196_BT_Ma_ar_201_g1_i2::g.28504::m.28504     | 14.00   | 7.70    | YES |          |
|                      | Gene.67548::c10971_BT_Ma_ar_201_g3_i1::g.67548::m.67548    | 40.30   | 90.01   | YES |          |
|                      | Gene.41582::c8751_BT_Ma_ar_201_g1_i2::g.41582::m.41582     | 7.88    | 5.09    | NO  |          |
|                      | Gene.28501::c7196_BT_Ma_ar_201_g1_i1::g.28501::m.28501     | 10.05   | 0.00    | NO  |          |
|                      | Gene.155793::c56607_BT_Ma_ar_201_g1_i1::g.155793::m.155793 | 2.46    | 1.71    | NO  |          |
|                      | Gene.143089::c45249_BT_Ma_ar_201_g1_i1::g.143089::m.143089 | 4.99    | 5.34    | NO  |          |
|                      | Gene.149466::c50074_BT_Ma_ar_201_g1_i1::g.149466::m.149466 | 2.31    | 4.47    | NO  |          |
| Kunitz               | Gene.89151::c12217_BT_Ma_ar_201_g1_i1::g.89151::m.89151    | 126.42  | 71.77   | YES |          |
|                      | Gene.71522::c11261_BT_Ma_ar_201_g1_i1::g.71522::m.71522    | 35.56   | 17.76   | NO  |          |
|                      | Gene.18759::c5598_BT_Ma_ar_201_g1_i1::g.18759::m.18759     | 168.97  | 297.21  | YES |          |
|                      | Gene.61876::c10561_BT_Ma_ar_201_g1_i1::g.61876::m.61876    | 5.51    | 1.56    | YES |          |
|                      | Gene.61901::c10561_BT_Ma_ar_201_g1_i2::g.61901::m.61901    | 5.51    | 1.56    | YES |          |
|                      | Gene.154614::c55630_BT_Ma_ar_201_g1_i1::g.154614::m.154614 | 87.47   | 95.37   | NO  |          |
|                      | Gene.97366::c12536_BT_Ma_ar_201_g1_i1::g.97366::m.97366    | 4.76    | 1.90    | NO  |          |
|                      | Gene.105517::c12789_BT_Ma_ar_201_g1_i1::g.105517::m.105517 | 19.42   | 1.24    | NO  | excluded |
|                      | Gene.97403::c12536_BT_Ma_ar_201_g1_i3::g.97403::m.97403    | 4.97    | 0.13    | NO  |          |
|                      | Gene.97422::c12536_BT_Ma_ar_201_g1_i4::g.97422::m.97422    | 4.88    | 0.00    | NO  |          |
|                      | Gene.97389::c12536_BT_Ma_ar_201_g1_i2::g.97389::m.97389    | 5.22    | 1.25    | NO  | excluded |
|                      | Gene.17651::c5368_BT_Ma_ar_201_g1_i1::g.17651::m.17651     | 57.04   | 76.71   | NO  |          |
|                      | Gene.9688::c3499_BT_Ma_ar_201_g1_i1::g.9688::m.9688        | 12.15   | 14.25   | YES |          |
|                      | Gene.5434::c1981_BT_Ma_ar_201_g1_i1::g.5434::m.5434        | 5.76    | 10.68   | YES |          |
|                      | Gene.8747::c3175_BT_Ma_ar_201_g1_i1::g.8747::m.8747        | 4.48    | 6.59    | YES |          |
|                      | Gene.88336::c12186_BT_Ma_ar_201_g1_i1::g.88336::m.88336    | 2.11    | 3.87    | YES |          |
|                      | Gene.123331::c24834_BT_Ma_ar_201_g1_i1::g.123331::m.123331 | 0.97    | 1.04    | NO  |          |
|                      | Gene.123332::c24834_BT_Ma_ar_201_g1_i1::g.123332::m.123332 | 1.00    | 0.68    | NO  |          |
|                      | Gene.114104::c15956_BT_Ma_ar_201_g1_i1::g.114104::m.114104 | 1.08    | 5.12    | NO  |          |
| Lectin c-type        | Gene.36026::c8138_BT_Ma_ar_201_g1_i1::g.36026::m.36026     | 14.07   | 7.01    | YES | excluded |
|                      | Gene.105760::c12795_BT_Ma_ar_201_g1_i4::g.105760::m.105760 | 5.76    | 0.23    | NO  |          |
|                      | Gene.105734::c12795_BT_Ma_ar_201_g1_i2::g.105734::m.105734 | 5.67    | 1.53    | NO  |          |
|                      | Gene.11911::c4239_BT_Ma_ar_201_g1_i1::g.11911::m.11911     | 46.50   | 29.17   | YES |          |
|                      | Gene.105749::c12795_BT_Ma_ar_201_g1_i3::g.105749::m.105749 | 6.60    | 0.58    | NO  |          |
|                      | Gene.105775::c12795_BT_Ma_ar_201_g1_i5::g.105775::m.105775 | 6.90    | 0.42    | NO  |          |
|                      | Gene.102428::c12697_BT_Ma_ar_201_g1_i1::g.102428::m.102428 | 14.33   | 8.13    | NO  |          |
|                      | Gene.105726::c12795_BT_Ma_ar_201_g1_i1::g.105726::m.105726 | 7.66    | 1.23    | NO  |          |
|                      | Gene.102444::c12697_BT_Ma_ar_201_g1_i2::g.102444::m.102444 | 9.46    | 2.25    | NO  |          |
|                      | Gene.14425::c4754_BT_Ma_ar_201_g1_i1::g.14425::m.14425     | 2.98    | 2.65    | YES |          |
|                      | Gene.130433::c31420_BT_Ma_ar_201_g1_i1::g.130433::m.130433 | 3.25    | 2.93    | NO  |          |
|                      | Gene.114463::c16318_BT_Ma_ar_201_g1_i1::g.114463::m.114463 | 1.46    | 0.80    | NO  |          |
|                      | Gene.126170::c28379_BT_Ma_ar_201_g1_i1::g.126170::m.126170 | 1.63    | 1.05    | NO  |          |
|                      | Gene.123368::c24872_BT_Ma_ar_201_g1_i1::g.123368::m.123368 | 1.05    | 0.47    | NO  |          |
|                      | Gene.155118::c56036_BT_Ma_ar_201_g1_i1::g.155118::m.155118 | 0.84    | 0.00    | NO  |          |
| Lipocalin calycins   | Gene.53973::c9931_BT_Ma_ar_201_g1_i1::g.53973::m.53973     | 304.44  | 188.94  | YES |          |
|                      | Gene.6370::c2249_BT_Ma_ar_201_g1_i1::g.6370::m.6370        | 361.04  | 283.45  | YES |          |
|                      | Gene.84615::c11973_BT_Ma_ar_201_g1_i1::g.84615::m.84615    | 16.65   | 10.91   | YES |          |

|                            |                                                            |         |         |     |
|----------------------------|------------------------------------------------------------|---------|---------|-----|
|                            | Gene.120380::c22458_BT_Ma_ar_201_g1_i1::g.120380::m.120380 | 9.81    | 3.87    | NO  |
|                            | Gene.120384::c22458_BT_Ma_ar_201_g1_i2::g.120384::m.120384 | 9.81    | 3.87    | NO  |
|                            | Gene.7610::c2677_BT_Ma_ar_201_g1_i2::g.7610::m.7610        | 1.71    | 1.34    | NO  |
| Maxadilan-like             | no hit                                                     | 0       | 0       | X   |
| MBF2-domain                | Gene.41350::c8726_BT_Ma_ar_201_g1_i1::g.41350::m.41350     | 2306.14 | 2338.62 | YES |
|                            | Gene.21832::c6201_BT_Ma_ar_201_g1_i1::g.21832::m.21832     | 501.79  | 544.99  | YES |
|                            | Gene.24349::c6571_BT_Ma_ar_201_g1_i1::g.24349::m.24349     | 170.09  | 197.61  | YES |
|                            | Gene.127315::c29022_BT_Ma_ar_201_g1_i1::g.127315::m.127315 | 105.96  | 97.85   | NO  |
|                            | Gene.130793::c31762_BT_Ma_ar_201_g1_i1::g.130793::m.130793 | 85.75   | 84.30   | NO  |
|                            | Gene.25112::c6680_BT_Ma_ar_201_g1_i1::g.25112::m.25112     | 47.81   | 58.77   | YES |
|                            | Gene.48115::c9376_BT_Ma_ar_201_g1_i1::g.48115::m.48115     | 30.77   | 13.06   | YES |
|                            | Gene.48118::c9376_BT_Ma_ar_201_g1_i2::g.48118::m.48118     | 30.77   | 13.06   | YES |
|                            | Gene.48121::c9376_BT_Ma_ar_201_g1_i3::g.48121::m.48121     | 30.77   | 13.06   | YES |
|                            | Gene.147264::c47889_BT_Ma_ar_201_g1_i1::g.147264::m.147264 | 4.39    | 6.30    | NO  |
| Melittin-like              | no hit                                                     | 0       | 0       | X   |
| Natterin-like (Asilidin10) | Gene.18175::c5457_BT_Ma_ar_201_g1_i1::g.18175::m.18175     | 392.69  | 263.15  | NO  |
|                            | Gene.49004::c9464_BT_Ma_ar_201_g1_i1::g.49004::m.49004     | 92.48   | 63.43   | NO  |
|                            | Gene.33996::c7899_BT_Ma_ar_201_g1_i1::g.33996::m.33996     | 29.50   | 20.63   | NO  |
|                            | Gene.34984::c8003_BT_Ma_ar_201_g1_i1::g.34984::m.34984     | 23.65   | 6.76    | NO  |
|                            | Gene.34989::c8003_BT_Ma_ar_201_g1_i2::g.34989::m.34989     | 29.56   | 19.48   | NO  |
|                            | Gene.42290::c8827_BT_Ma_ar_201_g1_i1::g.42290::m.42290     | 7.33    | 4.12    | NO  |
| Neurokinin-like            | no hit                                                     | 0       | 0       | X   |
| Nitrophorin-like           | no hit                                                     | 0       | 0       | X   |
| Novel protein (Asilidin2)  | Gene.21554::c6170_BT_Ma_ar_201_g1_i1::g.21554::m.21554     | 1777.28 | 1329.58 | YES |
|                            | Gene.41502::c8742_BT_Ma_ar_201_g1_i1::g.41502::m.41502     | 271.73  | 84.57   | YES |
|                            | Gene.41503::c8742_BT_Ma_ar_201_g1_i2::g.41503::m.41503     | 271.73  | 84.57   | YES |
|                            | Gene.79913::c11744_BT_Ma_ar_201_g1_i1::g.79913::m.79913    | 92.44   | 53.75   | YES |
|                            | Gene.71032::c11227_BT_Ma_ar_201_g1_i1::g.71032::m.71032    | 74.50   | 48.46   | YES |
|                            | Gene.92596::c12356_BT_Ma_ar_201_g1_i2::g.92596::m.92596    | 23.20   | 11.52   | NO  |
|                            | Gene.92590::c12356_BT_Ma_ar_201_g1_i1::g.92590::m.92590    | 16.91   | 7.60    | YES |
|                            | Gene.81282::c11818_BT_Ma_ar_201_g1_i1::g.81282::m.81282    | 9.71    | 7.44    | YES |
|                            | Gene.110503::c13360_BT_Ma_ar_201_g1_i1::g.110503::m.110503 | 4.41    | 2.31    | NO  |
|                            | Gene.39630::c8538_BT_Ma_ar_201_g1_i1::g.39630::m.39630     | 5.11    | 2.59    | NO  |
|                            | Gene.41214::c8703_BT_Ma_ar_201_g1_i1::g.41214::m.41214     | 3.56    | 2.02    | YES |
|                            | Gene.14287::c4723_BT_Ma_ar_201_g1_i1::g.14287::m.14287     | 3.60    | 2.09    | NO  |
|                            | Gene.66422::c10881_BT_Ma_ar_201_g1_i2::g.66422::m.66422    | 3.71    | 1.78    | NO  |
|                            | Gene.121292::c23081_BT_Ma_ar_201_g1_i1::g.121292::m.121292 | 1.70    | 1.12    | NO  |
|                            | Gene.66419::c10881_BT_Ma_ar_201_g1_i1::g.66419::m.66419    | 1.79    | 2.09    | NO  |
|                            | Gene.145216::c46377_BT_Ma_ar_201_g1_i1::g.145216::m.145216 | 1.33    | 1.44    | NO  |
|                            | Gene.81288::c11818_BT_Ma_ar_201_g2_i1::g.81288::m.81288    | 2.04    | 3.19    | NO  |
| Novel protein (Asilidin3)  | Gene.2992::c1157_BT_Ma_ar_201_g1_i2::g.2992::m.2992        | 158.34  | 139.39  | YES |
|                            | Gene.2991::c1157_BT_Ma_ar_201_g1_i1::g.2991::m.2991        | 127.21  | 19.23   | YES |
|                            | Gene.27157::c7006_BT_Ma_ar_201_g1_i1::g.27157::m.27157     | 9.43    | 13.51   | YES |
| Novel protein (Asilidin4)  | Gene.114720::c16546_BT_Ma_ar_201_g1_i1::g.114720::m.114720 | 2.58    | 3.47    | NO  |
| Novel protein (Asilidin5)  | Gene.47615::c9335_BT_Ma_ar_201_g1_i1::g.47615::m.47615     | 48.75   | 31.18   | YES |
|                            | Gene.131739::c32726_BT_Ma_ar_201_g1_i1::g.131739::m.131739 | 1.70    | 1.75    | NO  |
| Novel protein (Asilidin6)  | no hit                                                     | 0       | 0       | X   |
| Novel protein (Asilidin7)  | no hit                                                     | 0       | 0       | X   |
| Peptidase M12              | Gene.153229::c54758_BT_Ma_ar_201_g1_i1::g.153229::m.153229 | 307.34  | 202.47  | NO  |
|                            | Gene.8639::c3136_BT_Ma_ar_201_g1_i1::g.8639::m.8639        | 109.69  | 75.56   | NO  |
|                            | Gene.44509::c9040_BT_Ma_ar_201_g1_i1::g.44509::m.44509     | 13.58   | 5.80    | NO  |
|                            | Gene.44521::c9040_BT_Ma_ar_201_g1_i2::g.44521::m.44521     | 15.00   | 2.57    | NO  |
|                            | Gene.106137::c12808_BT_Ma_ar_201_g1_i1::g.106137::m.106137 | 8.14    | 3.07    | NO  |
|                            | Gene.31561::c7589_BT_Ma_ar_201_g1_i2::g.31561::m.31561     | 9.49    | 4.60    | YES |
|                            | Gene.31579::c7589_BT_Ma_ar_201_g1_i3::g.31579::m.31579     | 9.53    | 0.84    | YES |
|                            | Gene.106154::c12808_BT_Ma_ar_201_g1_i2::g.106154::m.106154 | 8.23    | 2.09    | NO  |
|                            | Gene.70649::c11202_BT_Ma_ar_201_g1_i1::g.70649::m.70649    | 7.55    | 4.62    | YES |
|                            | Gene.64398::c10735_BT_Ma_ar_201_g1_i1::g.64398::m.64398    | 8.04    | 4.14    | NO  |
|                            | Gene.53853::c9912_BT_Ma_ar_201_g1_i3::g.53853::m.53853     | 23.84   | 14.15   | NO  |
|                            | Gene.46302::c9209_BT_Ma_ar_201_g1_i2::g.46302::m.46302     | 7.19    | 2.01    | YES |
|                            | Gene.15108::c4897_BT_Ma_ar_201_g1_i1::g.15108::m.15108     | 13.32   | 8.95    | NO  |
|                            | Gene.46290::c9209_BT_Ma_ar_201_g1_i1::g.46290::m.46290     | 7.03    | 2.39    | YES |
|                            | Gene.46291::c9209_BT_Ma_ar_201_g1_i1::g.46291::m.46291     | 6.95    | 0.32    | NO  |
|                            | Gene.64399::c10735_BT_Ma_ar_201_g1_i1::g.64399::m.64399    | 4.04    | 2.87    | YES |
|                            | Gene.155335::c56229_BT_Ma_ar_201_g1_i1::g.155335::m.155335 | 2.06    | 1.15    | NO  |
|                            | Gene.16454::c5136_BT_Ma_ar_201_g1_i1::g.16454::m.16454     | 4.83    | 4.18    | NO  |
|                            | Gene.1768::c631_BT_Ma_ar_201_g1_i1::g.1768::m.1768         | 1.92    | 1.75    | NO  |
|                            | Gene.1775::c631_BT_Ma_ar_201_g1_i2::g.1775::m.1775         | 1.89    | 0.00    | NO  |
|                            | Gene.146852::c47565_BT_Ma_ar_201_g1_i1::g.146852::m.146852 | 0.84    | 0.66    | NO  |
|                            | Gene.148272::c48824_BT_Ma_ar_201_g1_i1::g.148272::m.148272 | 0.64    | 1.53    | NO  |
|                            | Gene.154913::c55875_BT_Ma_ar_201_g1_i1::g.154913::m.154913 | 0.33    | 3.43    | NO  |
| Peptidase M13              | Gene.54034::c9940_BT_Ma_ar_201_g1_i1::g.54034::m.54034     | 587.73  | 295.55  | YES |
|                            | Gene.18379::c5498_BT_Ma_ar_201_g2_i1::g.18379::m.18379     | 310.52  | 181.55  | YES |

|               |                                                            |         |         |     |
|---------------|------------------------------------------------------------|---------|---------|-----|
|               | Gene.84024::c11945_BT_Ma_ar_201_g1_i1::g.84024::m.84024    | 293.26  | 177.35  | YES |
|               | Gene.68065::c11012_BT_Ma_ar_201_g1_i1::g.68065::m.68065    | 225.99  | 124.31  | YES |
|               | Gene.4012::c1436_BT_Ma_ar_201_g1_i1::g.4012::m.4012        | 117.60  | 65.20   | YES |
|               | Gene.69748::c11133_BT_Ma_ar_201_g1_i1::g.69748::m.69748    | 126.00  | 76.12   | NO  |
|               | Gene.38384::c8413_BT_Ma_ar_201_g1_i1::g.38384::m.38384     | 94.76   | 52.19   | YES |
|               | Gene.76312::c11556_BT_Ma_ar_201_g1_i1::g.76312::m.76312    | 60.44   | 34.94   | YES |
|               | Gene.38638::c8440_BT_Ma_ar_201_g1_i1::g.38638::m.38638     | 60.74   | 35.92   | YES |
|               | Gene.48796::c9439_BT_Ma_ar_201_g1_i1::g.48796::m.48796     | 48.22   | 27.95   | NO  |
|               | Gene.77963::c11648_BT_Ma_ar_201_g1_i1::g.77963::m.77963    | 51.97   | 32.82   | YES |
|               | Gene.75638::c11520_BT_Ma_ar_201_g1_i3::g.75638::m.75638    | 35.81   | 0.00    | NO  |
|               | Gene.75626::c11520_BT_Ma_ar_201_g1_i2::g.75626::m.75626    | 36.58   | 16.27   | NO  |
|               | Gene.96967::c12522_BT_Ma_ar_201_g1_i1::g.96967::m.96967    | 39.80   | 21.58   | NO  |
|               | Gene.75650::c11520_BT_Ma_ar_201_g1_i4::g.75650::m.75650    | 34.93   | 3.96    | NO  |
|               | Gene.107618::c12854_BT_Ma_ar_201_g1_i1::g.107618::m.107618 | 39.30   | 21.72   | NO  |
|               | Gene.69969::c11150_BT_Ma_ar_201_g1_i1::g.69969::m.69969    | 24.04   | 13.71   | YES |
|               | Gene.84905::c11991_BT_Ma_ar_201_g1_i1::g.84905::m.84905    | 27.44   | 17.16   | NO  |
|               | Gene.91320::c12307_BT_Ma_ar_201_g2_i1::g.91320::m.91320    | 15.14   | 4.62    | YES |
|               | Gene.91326::c12307_BT_Ma_ar_201_g2_i2::g.91326::m.91326    | 15.14   | 4.62    | YES |
|               | Gene.107619::c12854_BT_Ma_ar_201_g1_i1::g.107619::m.107619 | 12.46   | 7.08    | NO  |
|               | Gene.22833::c6363_BT_Ma_ar_201_g1_i1::g.22833::m.22833     | 20.93   | 12.06   | NO  |
|               | Gene.10945::c4030_BT_Ma_ar_201_g1_i1::g.10945::m.10945     | 9.99    | 5.83    | YES |
|               | Gene.53784::c9906_BT_Ma_ar_201_g1_i1::g.53784::m.53784     | 6.66    | 3.86    | YES |
|               | Gene.14458::c4765_BT_Ma_ar_201_g1_i1::g.14458::m.14458     | 6.63    | 4.19    | YES |
|               | Gene.22834::c6363_BT_Ma_ar_201_g1_i1::g.22834::m.22834     | 18.75   | 12.35   | YES |
|               | Gene.2324::c850_BT_Ma_ar_201_g1_i1::g.2324::m.2324         | 6.85    | 4.11    | YES |
|               | Gene.112510::c14665_BT_Ma_ar_201_g1_i1::g.112510::m.112510 | 4.41    | 2.46    | NO  |
|               | Gene.65479::c10809_BT_Ma_ar_201_g1_i1::g.65479::m.65479    | 5.81    | 3.28    | NO  |
|               | Gene.24526::c6585_BT_Ma_ar_201_g1_i1::g.24526::m.24526     | 11.89   | 8.60    | NO  |
|               | Gene.24525::c6585_BT_Ma_ar_201_g1_i1::g.24525::m.24525     | 8.22    | 5.70    | NO  |
|               | Gene.14191::c4700_BT_Ma_ar_201_g1_i1::g.14191::m.14191     | 4.17    | 2.19    | YES |
|               | Gene.1592::c564_BT_Ma_ar_201_g1_i1::g.1592::m.1592         | 3.64    | 2.65    | NO  |
|               | Gene.154853::c55826_BT_Ma_ar_201_g1_i1::g.154853::m.154853 | 4.61    | 2.59    | NO  |
|               | Gene.135048::c37085_BT_Ma_ar_201_g1_i1::g.135048::m.135048 | 3.38    | 2.22    | NO  |
|               | Gene.56192::c10119_BT_Ma_ar_201_g1_i1::g.56192::m.56192    | 3.64    | 2.31    | NO  |
|               | Gene.9414::c3380_BT_Ma_ar_201_g1_i1::g.9414::m.9414        | 2.56    | 1.45    | NO  |
|               | Gene.2444::c897_BT_Ma_ar_201_g1_i1::g.2444::m.2444         | 4.08    | 1.53    | NO  |
|               | Gene.29329::c7298_BT_Ma_ar_201_g1_i1::g.29329::m.29329     | 2.62    | 1.36    | NO  |
|               | Gene.144185::c45755_BT_Ma_ar_201_g1_i1::g.144185::m.144185 | 2.06    | 1.52    | NO  |
|               | Gene.7226::c2546_BT_Ma_ar_201_g1_i1::g.7226::m.7226        | 3.38    | 2.36    | NO  |
|               | Gene.143100::c45255_BT_Ma_ar_201_g1_i1::g.143100::m.143100 | 2.32    | 1.43    | NO  |
|               | Gene.110408::c13303_BT_Ma_ar_201_g1_i1::g.110408::m.110408 | 2.75    | 2.32    | NO  |
|               | Gene.13848::c4631_BT_Ma_ar_201_g1_i1::g.13848::m.13848     | 2.04    | 1.36    | NO  |
|               | Gene.6448::c2266_BT_Ma_ar_201_g1_i1::g.6448::m.6448        | 1.57    | 1.26    | YES |
|               | Gene.5627::c2055_BT_Ma_ar_201_g1_i1::g.5627::m.5627        | 3.24    | 3.07    | NO  |
|               | Gene.110544::c13380_BT_Ma_ar_201_g1_i1::g.110544::m.110544 | 1.67    | 1.25    | NO  |
|               | Gene.136003::c37619_BT_Ma_ar_201_g1_i1::g.136003::m.136003 | 1.52    | 1.18    | NO  |
|               | Gene.137406::c38594_BT_Ma_ar_201_g1_i1::g.137406::m.137406 | 1.93    | 1.66    | NO  |
|               | Gene.5500::c2015_BT_Ma_ar_201_g1_i1::g.5500::m.5500        | 2.16    | 3.08    | YES |
|               | Gene.111073::c13710_BT_Ma_ar_201_g1_i1::g.111073::m.111073 | 1.75    | 2.80    | NO  |
|               | Gene.127269::c28992_BT_Ma_ar_201_g1_i1::g.127269::m.127269 | 0.89    | 1.31    | NO  |
|               | Gene.144195::c45762_BT_Ma_ar_201_g1_i1::g.144195::m.144195 | 1.22    | 1.60    | NO  |
|               | Gene.156401::c57085_BT_Ma_ar_201_g1_i1::g.156401::m.156401 | 1.11    | 0.55    | NO  |
|               | Gene.130751::c31715_BT_Ma_ar_201_g1_i1::g.130751::m.130751 | 1.30    | 1.64    | NO  |
|               | Gene.122676::c24190_BT_Ma_ar_201_g1_i1::g.122676::m.122676 | 0.95    | 1.49    | NO  |
|               | Gene.111858::c14226_BT_Ma_ar_201_g1_i1::g.111858::m.111858 | 0.94    | 3.50    | NO  |
|               | Gene.114764::c16592_BT_Ma_ar_201_g1_i1::g.114764::m.114764 | 0.66    | 1.29    | NO  |
|               | Gene.116757::c18896_BT_Ma_ar_201_g1_i1::g.116757::m.116757 | 0.68    | 0.90    | NO  |
|               | Gene.123642::c25177_BT_Ma_ar_201_g1_i1::g.123642::m.123642 | 0.97    | 2.05    | NO  |
|               | Gene.138033::c39058_BT_Ma_ar_201_g1_i1::g.138033::m.138033 | 0.73    | 1.04    | NO  |
|               | Gene.115531::c17414_BT_Ma_ar_201_g1_i1::g.115531::m.115531 | 0.85    | 2.95    | NO  |
|               | Gene.128437::c29764_BT_Ma_ar_201_g1_i1::g.128437::m.128437 | 0.60    | 0.00    | NO  |
|               | Gene.10426::c3807_BT_Ma_ar_201_g1_i1::g.10426::m.10426     | 1.15    | 0.00    | NO  |
|               | Gene.139184::c40079_BT_Ma_ar_201_g1_i1::g.139184::m.139184 | 0.68    | 0.00    | NO  |
|               | Gene.150379::c51166_BT_Ma_ar_201_g1_i1::g.150379::m.150379 | 0.50    | 1.58    | NO  |
|               | Gene.122052::c23656_BT_Ma_ar_201_g1_i1::g.122052::m.122052 | 0.47    | 5.94    | NO  |
| Peptidase M14 | Gene.25661::c6761_BT_Ma_ar_201_g1_i1::g.25661::m.25661     | 1834.10 | 1066.49 | YES |
|               | Gene.58257::c10278_BT_Ma_ar_201_g2_i2::g.58257::m.58257    | 44.59   | 21.90   | YES |
|               | Gene.78424::c11673_BT_Ma_ar_201_g1_i1::g.78424::m.78424    | 143.20  | 85.26   | YES |
|               | Gene.47589::c9333_BT_Ma_ar_201_g1_i1::g.47589::m.47589     | 49.18   | 29.30   | YES |
|               | Gene.58251::c10278_BT_Ma_ar_201_g2_i1::g.58251::m.58251    | 49.08   | 15.70   | YES |
|               | Gene.118692::c21531_BT_Ma_ar_201_g1_i1::g.118692::m.118692 | 62.07   | 37.27   | NO  |
|               | Gene.82558::c11878_BT_Ma_ar_201_g1_i1::g.82558::m.82558    | 47.35   | 30.60   | YES |
|               | Gene.34707::c7971_BT_Ma_ar_201_g1_i1::g.34707::m.34707     | 34.28   | 20.35   | YES |
|               | Gene.34712::c7971_BT_Ma_ar_201_g1_i2::g.34712::m.34712     | 34.19   | 0.00    | YES |
|               | Gene.1034::c381_BT_Ma_ar_201_g1_i1::g.1034::m.1034         | 35.00   | 21.44   | YES |
|               | Gene.75785::c11528_BT_Ma_ar_201_g1_i1::g.75785::m.75785    | 26.71   | 16.79   | YES |
|               | Gene.66298::c10874_BT_Ma_ar_201_g2_i1::g.66298::m.66298    | 19.40   | 11.66   | YES |
|               | Gene.66303::c10874_BT_Ma_ar_201_g2_i2::g.66303::m.66303    | 18.29   | 1.69    | YES |
|               | Gene.123504::c25045_BT_Ma_ar_201_g1_i1::g.123504::m.123504 | 0.84    | 0.67    | NO  |
|               | Gene.135067::c37093_BT_Ma_ar_201_g1_i1::g.135067::m.135067 | 0.83    | 0.90    | NO  |
|               | Gene.150434::c51228_BT_Ma_ar_201_g1_i1::g.150434::m.150434 | 0.50    | 1.22    | NO  |
|               | Gene.158112::c58889_BT_Ma_ar_201_g1_i1::g.158112::m.158112 | 0.99    | 1.50    | NO  |
| Peptidase S10 | Gene.50758::c9627_BT_Ma_ar_201_g1_i1::g.50758::m.50758     | 149.69  | 88.26   | YES |
|               | Gene.21138::c6101_BT_Ma_ar_201_g1_i1::g.21138::m.21138     | 61.47   | 34.22   | YES |
|               | Gene.36746::c8222_BT_Ma_ar_201_g1_i1::g.36746::m.36746     | 15.48   | 6.97    | NO  |
|               | Gene.133717::c35213_BT_Ma_ar_201_g1_i1::g.133717::m.133717 | 0.57    | 0.00    | NO  |
| Peptidase S1  | Gene.152462::c54419_BT_Ma_ar_201_g1_i1::g.152462::m.152462 | 7914.57 | 4919.74 | NO  |
|               | Gene.152306::c54353_BT_Ma_ar_201_g1_i1::g.152306::m.152306 | 7288.54 | 4670.59 | NO  |
|               | Gene.11221::c4095_BT_Ma_ar_201_g1_i1::g.11221::m.11221     | 5323.59 | 3413.49 | NO  |
|               | Gene.125784::c28228_BT_Ma_ar_201_g1_i1::g.125784::m.125784 | 3796.84 | 2422.30 | NO  |
|               | Gene.31723::c7605_BT_Ma_ar_201_g1_i1::g.31723::m.31723     | 3463.24 | 2189.28 | YES |
|               | Gene.152645::c54485_BT_Ma_ar_201_g1_i1::g.152645::m.152645 | 3005.74 | 1920.04 | NO  |
|               | Gene.71704::c11277_BT_Ma_ar_201_g1_i1::g.71704::m.71704    | 2275.17 | 1760.78 | NO  |
|               | Gene.119215::c21790_BT_Ma_ar_201_g1_i1::g.119215::m.119215 | 1861.46 | 1202.55 | NO  |
|               | Gene.90915::c12282_BT_Ma_ar_201_g2_i1::g.90915::m.90915    | 1767.71 | 1150.41 | NO  |

|  |                                                            |         |         |     |          |
|--|------------------------------------------------------------|---------|---------|-----|----------|
|  | Gene.39674::c8547_BT_Ma_ar_201_g1_i1::g.39674::m.39674     | 1099.47 | 703.93  | YES |          |
|  | Gene.32758::c7751_BT_Ma_ar_201_g1_i1::g.32758::m.32758     | 979.63  | 585.07  | YES |          |
|  | Gene.143661::c45514_BT_Ma_ar_201_g1_i1::g.143661::m.143661 | 932.57  | 607.21  | NO  |          |
|  | Gene.107740::c12857_BT_Ma_ar_201_g1_i1::g.107740::m.107740 | 127.88  | 66.49   | NO  | excluded |
|  | Gene.11283::c4108_BT_Ma_ar_201_g1_i1::g.11283::m.11283     | 836.56  | 532.58  | YES |          |
|  | Gene.109593::c12932_BT_Ma_ar_201_g1_i1::g.109593::m.109593 | 422.51  | 235.34  | NO  |          |
|  | Gene.34883::c7986_BT_Ma_ar_201_g1_i1::g.34883::m.34883     | 653.79  | 424.66  | NO  |          |
|  | Gene.57001::c10198_BT_Ma_ar_201_g1_i1::g.57001::m.57001    | 645.66  | 401.09  | NO  |          |
|  | Gene.32764::c7751_BT_Ma_ar_201_g2_i2::g.32764::m.32764     | 622.33  | 411.32  | YES |          |
|  | Gene.24084::c6538_BT_Ma_ar_201_g1_i1::g.24084::m.24084     | 586.42  | 388.29  | YES |          |
|  | Gene.120282::c22396_BT_Ma_ar_201_g1_i1::g.120282::m.120282 | 516.80  | 316.22  | NO  |          |
|  | Gene.62395::c10598_BT_Ma_ar_201_g1_i1::g.62395::m.62395    | 452.92  | 293.14  | YES |          |
|  | Gene.24216::c6555_BT_Ma_ar_201_g1_i1::g.24216::m.24216     | 440.47  | 266.85  | NO  |          |
|  | Gene.154170::c55325_BT_Ma_ar_201_g1_i1::g.154170::m.154170 | 458.66  | 295.05  | NO  |          |
|  | Gene.152920::c54605_BT_Ma_ar_201_g1_i1::g.152920::m.152920 | 440.03  | 275.24  | NO  |          |
|  | Gene.90911::c12282_BT_Ma_ar_201_g1_i1::g.90911::m.90911    | 1646.33 | 2104.14 | NO  |          |
|  | Gene.22661::c6331_BT_Ma_ar_201_g1_i1::g.22661::m.22661     | 448.50  | 278.68  | YES |          |
|  | Gene.32624::c7725_BT_Ma_ar_201_g1_i1::g.32624::m.32624     | 386.97  | 245.06  | YES |          |
|  | Gene.90917::c12282_BT_Ma_ar_201_g2_i2::g.90917::m.90917    | 690.44  | 273.26  | NO  |          |
|  | Gene.110168::c13179_BT_Ma_ar_201_g1_i1::g.110168::m.110168 | 357.09  | 222.77  | NO  |          |
|  | Gene.32461::c7707_BT_Ma_ar_201_g1_i1::g.32461::m.32461     | 345.03  | 195.39  | YES |          |
|  | Gene.31486::c7576_BT_Ma_ar_201_g1_i1::g.31486::m.31486     | 315.57  | 197.40  | NO  |          |
|  | Gene.100235::c12629_BT_Ma_ar_201_g1_i2::g.100235::m.100235 | 65.31   | 30.14   | NO  | excluded |
|  | Gene.98967::c12593_BT_Ma_ar_201_g3_i3::g.98967::m.98967    | 250.36  | 91.44   | YES |          |
|  | Gene.98972::c12593_BT_Ma_ar_201_g3_i3::g.98972::m.98972    | 248.51  | 45.06   | YES |          |
|  | Gene.42848::c8878_BT_Ma_ar_201_g1_i1::g.42848::m.42848     | 278.77  | 181.87  | YES |          |
|  | Gene.32466::c7707_BT_Ma_ar_201_g1_i2::g.32466::m.32466     | 303.43  | 183.35  | NO  |          |
|  | Gene.63340::c10666_BT_Ma_ar_201_g1_i1::g.63340::m.63340    | 136.43  | 76.90   | YES |          |
|  | Gene.135078::c37100_BT_Ma_ar_201_g1_i1::g.135078::m.135078 | 213.91  | 136.85  | NO  |          |
|  | Gene.144221::c45781_BT_Ma_ar_201_g1_i1::g.144221::m.144221 | 214.97  | 142.00  | NO  |          |
|  | Gene.3751::c1373_BT_Ma_ar_201_g1_i1::g.3751::m.3751        | 207.76  | 124.82  | YES |          |
|  | Gene.11749::c4200_BT_Ma_ar_201_g1_i1::g.11749::m.11749     | 197.10  | 125.77  | YES |          |
|  | Gene.73210::c11375_BT_Ma_ar_201_g1_i1::g.73210::m.73210    | 226.56  | 151.68  | NO  |          |
|  | Gene.135671::c37431_BT_Ma_ar_201_g1_i1::g.135671::m.135671 | 160.14  | 97.57   | NO  |          |
|  | Gene.52859::c9814_BT_Ma_ar_201_g1_i1::g.52859::m.52859     | 114.71  | 75.03   | YES |          |
|  | Gene.60585::c10460_BT_Ma_ar_201_g1_i2::g.60585::m.60585    | 98.57   | 35.68   | YES |          |
|  | Gene.60579::c10460_BT_Ma_ar_201_g1_i1::g.60579::m.60579    | 99.04   | 31.46   | YES |          |
|  | Gene.839::c291_BT_Ma_ar_201_g1_i1::g.839::m.839            | 135.83  | 81.71   | YES |          |
|  | Gene.51593::c9700_BT_Ma_ar_201_g1_i1::g.51593::m.51593     | 142.70  | 101.10  | NO  |          |
|  | Gene.16588::c5162_BT_Ma_ar_201_g1_i1::g.16588::m.16588     | 133.64  | 80.55   | YES |          |
|  | Gene.71603::c11271_BT_Ma_ar_201_g1_i1::g.71603::m.71603    | 124.90  | 27.58   | YES |          |
|  | Gene.71606::c11271_BT_Ma_ar_201_g1_i2::g.71606::m.71606    | 124.90  | 27.58   | YES |          |
|  | Gene.71609::c11271_BT_Ma_ar_201_g1_i3::g.71609::m.71609    | 124.90  | 27.58   | YES |          |
|  | Gene.100232::c12629_BT_Ma_ar_201_g1_i1::g.100232::m.100232 | 88.76   | 26.36   | NO  |          |
|  | Gene.98983::c12593_BT_Ma_ar_201_g3_i5::g.98983::m.98983    | 204.47  | 28.04   | NO  |          |
|  | Gene.126477::c28512_BT_Ma_ar_201_g1_i1::g.126477::m.126477 | 112.71  | 74.24   | NO  |          |
|  | Gene.73215::c11375_BT_Ma_ar_201_g2_i1::g.73215::m.73215    | 194.91  | 140.27  | YES |          |
|  | Gene.28195::c7164_BT_Ma_ar_201_g1_i1::g.28195::m.28195     | 77.33   | 46.87   | YES |          |
|  | Gene.23631::c6475_BT_Ma_ar_201_g1_i1::g.23631::m.23631     | 118.61  | 79.02   | YES |          |
|  | Gene.36876::c8237_BT_Ma_ar_201_g1_i1::g.36876::m.36876     | 106.65  | 68.07   | YES |          |
|  | Gene.98960::c12593_BT_Ma_ar_201_g3_i3::g.98960::m.98960    | 203.47  | 0.00    | NO  |          |
|  | Gene.40317::c8605_BT_Ma_ar_201_g1_i1::g.40317::m.40317     | 84.68   | 58.03   | YES |          |
|  | Gene.53855::c9913_BT_Ma_ar_201_g1_i1::g.53855::m.53855     | 86.22   | 64.18   | YES |          |
|  | Gene.50386::c9593_BT_Ma_ar_201_g1_i1::g.50386::m.50386     | 54.30   | 35.69   | YES |          |
|  | Gene.37245::c8282_BT_Ma_ar_201_g1_i1::g.37245::m.37245     | 74.59   | 50.15   | YES |          |
|  | Gene.53109::c9842_BT_Ma_ar_201_g1_i1::g.53109::m.53109     | 53.60   | 34.36   | YES |          |
|  | Gene.56263::c10129_BT_Ma_ar_201_g1_i1::g.56263::m.56263    | 41.79   | 12.38   | YES |          |
|  | Gene.56272::c10129_BT_Ma_ar_201_g1_i2::g.56272::m.56272    | 41.79   | 12.38   | YES |          |
|  | Gene.57105::c10204_BT_Ma_ar_201_g1_i3::g.57105::m.57105    | 71.78   | 39.65   | YES |          |
|  | Gene.52477::c9783_BT_Ma_ar_201_g1_i1::g.52477::m.52477     | 69.91   | 42.21   | YES |          |
|  | Gene.3446::c1298_BT_Ma_ar_201_g1_i1::g.3446::m.3446        | 69.62   | 45.86   | YES |          |
|  | Gene.3977::c1433_BT_Ma_ar_201_g1_i1::g.3977::m.3977        | 58.81   | 42.43   | YES |          |
|  | Gene.98984::c12593_BT_Ma_ar_201_g3_i5::g.98984::m.98984    | 170.59  | 7.08    | NO  |          |
|  | Gene.31874::c7626_BT_Ma_ar_201_g1_i1::g.31874::m.31874     | 59.93   | 39.49   | YES |          |
|  | Gene.26444::c6870_BT_Ma_ar_201_g1_i1::g.26444::m.26444     | 42.46   | 25.78   | YES |          |
|  | Gene.37853::c8362_BT_Ma_ar_201_g1_i1::g.37853::m.37853     | 48.90   | 30.53   | NO  |          |
|  | Gene.127579::c29170_BT_Ma_ar_201_g1_i1::g.127579::m.127579 | 51.79   | 34.71   | NO  |          |
|  | Gene.119812::c22097_BT_Ma_ar_201_g1_i1::g.119812::m.119812 | 52.88   | 32.65   | NO  |          |
|  | Gene.154767::c55759_BT_Ma_ar_201_g1_i1::g.154767::m.154767 | 84.91   | 55.95   | NO  |          |
|  | Gene.62906::c10639_BT_Ma_ar_201_g1_i1::g.62906::m.62906    | 43.44   | 28.54   | YES |          |
|  | Gene.18111::c5439_BT_Ma_ar_201_g1_i1::g.18111::m.18111     | 56.60   | 39.63   | YES |          |
|  | Gene.22820::c6362_BT_Ma_ar_201_g1_i1::g.22820::m.22820     | 42.35   | 23.57   | YES |          |
|  | Gene.31487::c7576_BT_Ma_ar_201_g1_i1::g.31487::m.31487     | 44.68   | 28.62   | YES |          |
|  | Gene.14130::c4687_BT_Ma_ar_201_g1_i1::g.14130::m.14130     | 43.10   | 31.05   | YES |          |
|  | Gene.1841::c657_BT_Ma_ar_201_g1_i1::g.1841::m.1841         | 37.51   | 26.07   | YES |          |
|  | Gene.69260::c11105_BT_Ma_ar_201_g1_i1::g.69260::m.69260    | 24.55   | 12.93   | YES |          |
|  | Gene.80775::c11795_BT_Ma_ar_201_g1_i1::g.80775::m.80775    | 23.06   | 15.26   | YES |          |
|  | Gene.57099::c10204_BT_Ma_ar_201_g1_i1::g.57099::m.57099    | 67.73   | 9.54    | YES |          |
|  | Gene.120468::c22509_BT_Ma_ar_201_g1_i1::g.120468::m.120468 | 88.25   | 76.91   | NO  |          |
|  | Gene.113790::c15687_BT_Ma_ar_201_g1_i1::g.113790::m.113790 | 40.54   | 26.75   | NO  |          |
|  | Gene.98961::c12593_BT_Ma_ar_201_g3_i3::g.98961::m.98961    | 105.22  | 18.58   | NO  |          |
|  | Gene.10067::c3661_BT_Ma_ar_201_g1_i1::g.10067::m.10067     | 31.66   | 23.26   | YES |          |
|  | Gene.34339::c7931_BT_Ma_ar_201_g1_i1::g.34339::m.34339     | 34.28   | 24.74   | YES |          |
|  | Gene.119484::c21924_BT_Ma_ar_201_g1_i1::g.119484::m.119484 | 34.26   | 21.30   | NO  |          |
|  | Gene.3487::c1316_BT_Ma_ar_201_g1_i1::g.3487::m.3487        | 22.25   | 14.87   | YES |          |
|  | Gene.110218::c13209_BT_Ma_ar_201_g1_i1::g.110218::m.110218 | 30.69   | 20.09   | NO  |          |
|  | Gene.119984::c22193_BT_Ma_ar_201_g1_i1::g.119984::m.119984 | 31.17   | 20.61   | NO  |          |
|  | Gene.24620::c6602_BT_Ma_ar_201_g1_i1::g.24620::m.24620     | 23.93   | 13.32   | YES |          |
|  | Gene.145092::c46298_BT_Ma_ar_201_g1_i1::g.145092::m.145092 | 19.88   | 13.36   | NO  |          |
|  | Gene.18588::c5543_BT_Ma_ar_201_g1_i1::g.18588::m.18588     | 29.13   | 17.59   | YES |          |
|  | Gene.26977::c6964_BT_Ma_ar_201_g1_i1::g.26977::m.26977     | 25.39   | 17.41   | YES |          |
|  | Gene.44577::c9043_BT_Ma_ar_201_g1_i1::g.44577::m.44577     | 19.95   | 13.44   | YES |          |
|  | Gene.22534::c6307_BT_Ma_ar_201_g1_i1::g.22534::m.22534     | 26.69   | 14.44   | YES |          |
|  | Gene.60760::c10476_BT_Ma_ar_201_g1_i2::g.60760::m.60760    | 26.53   | 16.56   | YES |          |
|  | Gene.72221::c11310_BT_Ma_ar_201_g1_i1::g.72221::m.72221    | 9.65    | 5.60    | YES |          |
|  | Gene.57100::c10204_BT_Ma_ar_201_g1_i1::g.57100::m.57100    | 55.60   | 5.13    | NO  |          |
|  | Gene.57102::c10204_BT_Ma_ar_201_g1_i2::g.57102::m.57102    | 55.60   | 5.13    | NO  |          |
|  | Gene.26431::c6867_BT_Ma_ar_201_g1_i1::g.26431::m.26431     | 24.33   | 14.34   | YES |          |
|  | Gene.143693::c45529_BT_Ma_ar_201_g1_i1::g.143693::m.143693 | 23.55   | 15.89   | NO  |          |
|  | Gene.126865::c28724_BT_Ma_ar_201_g1_i1::g.126865::m.126865 | 10.02   | 5.02    | NO  |          |
|  | Gene.119366::c21861_BT_Ma_ar_201_g1_i1::g.119366::m.119366 | 19.85   | 13.96   | NO  |          |

|  |                                                            |       |       |     |          |
|--|------------------------------------------------------------|-------|-------|-----|----------|
|  | Gene.35942::c8128_BT_Ma_ar_201_g1_i1::g.35942::m.35942     | 5.13  | 2.58  | NO  | excluded |
|  | Gene.154508::c55563_BT_Ma_ar_201_g1_i1::g.154508::m.154508 | 32.74 | 18.10 | NO  |          |
|  | Gene.8750::c3176_BT_Ma_ar_201_g1_i1::g.8750::m.8750        | 38.55 | 24.34 | NO  |          |
|  | Gene.57103::c10204_BT_Ma_ar_201_g1_i2::g.57103::m.57103    | 56.59 | 10.98 | YES | excluded |
|  | Gene.17231::c5286_BT_Ma_ar_201_g1_i2::g.17231::m.17231     | 17.08 | 9.42  | NO  |          |
|  | Gene.67817::c10991_BT_Ma_ar_201_g1_i1::g.67817::m.67817    | 17.89 | 11.03 | YES |          |
|  | Gene.23270::c6433_BT_Ma_ar_201_g1_i1::g.23270::m.23270     | 17.61 | 11.80 | YES | excluded |
|  | Gene.51831::c9714_BT_Ma_ar_201_g1_i1::g.51831::m.51831     | 14.66 | 7.39  | YES |          |
|  | Gene.67913::c10996_BT_Ma_ar_201_g1_i1::g.67913::m.67913    | 10.93 | 7.49  | YES |          |
|  | Gene.41835::c8781_BT_Ma_ar_201_g1_i1::g.41835::m.41835     | 15.81 | 11.50 | YES | excluded |
|  | Gene.17227::c5286_BT_Ma_ar_201_g1_i1::g.17227::m.17227     | 16.65 | 2.36  | NO  |          |
|  | Gene.62273::c10584_BT_Ma_ar_201_g1_i3::g.62273::m.62273    | 11.89 | 2.23  | YES |          |
|  | Gene.62263::c10584_BT_Ma_ar_201_g1_i2::g.62263::m.62263    | 11.49 | 3.86  | NO  | excluded |
|  | Gene.62251::c10584_BT_Ma_ar_201_g1_i1::g.62251::m.62251    | 14.13 | 3.86  | NO  |          |
|  | Gene.77369::c11612_BT_Ma_ar_201_g1_i1::g.77369::m.77369    | 10.39 | 7.05  | YES |          |
|  | Gene.56829::c10183_BT_Ma_ar_201_g1_i1::g.56829::m.56829    | 10.76 | 6.99  | YES | excluded |
|  | Gene.13155::c4477_BT_Ma_ar_201_g1_i1::g.13155::m.13155     | 11.29 | 8.04  | YES |          |
|  | Gene.18708::c5579_BT_Ma_ar_201_g1_i1::g.18708::m.18708     | 33.05 | 34.11 | NO  |          |
|  | Gene.67820::c10991_BT_Ma_ar_201_g2_i1::g.67820::m.67820    | 16.81 | 14.70 | YES | excluded |
|  | Gene.55821::c10084_BT_Ma_ar_201_g1_i2::g.55821::m.55821    | 5.38  | 2.62  | YES |          |
|  | Gene.98958::c12593_BT_Ma_ar_201_g2_i1::g.98958::m.98958    | 18.15 | 8.76  | NO  |          |
|  | Gene.673::c216_BT_Ma_ar_201_g1_i2::g.673::m.673            | 5.97  | 3.50  | NO  | excluded |
|  | Gene.16248::c5102_BT_Ma_ar_201_g1_i1::g.16248::m.16248     | 9.16  | 5.39  | NO  |          |
|  | Gene.39616::c8536_BT_Ma_ar_201_g1_i2::g.39616::m.39616     | 5.71  | 3.98  | YES |          |
|  | Gene.54307::c9964_BT_Ma_ar_201_g1_i1::g.54307::m.54307     | 8.14  | 5.64  | NO  | excluded |
|  | Gene.55810::c10084_BT_Ma_ar_201_g1_i1::g.55810::m.55810    | 4.65  | 1.27  | YES |          |
|  | Gene.29593::c7338_BT_Ma_ar_201_g1_i1::g.29593::m.29593     | 6.77  | 5.28  | YES |          |
|  | Gene.128566::c29834_BT_Ma_ar_201_g1_i1::g.128566::m.128566 | 7.22  | 5.47  | NO  | excluded |
|  | Gene.55813::c10084_BT_Ma_ar_201_g2_i1::g.55813::m.55813    | 3.71  | 2.10  | YES |          |
|  | Gene.51834::c9714_BT_Ma_ar_201_g1_i2::g.51834::m.51834     | 13.98 | 6.16  | YES |          |
|  | Gene.22453::c6291_BT_Ma_ar_201_g1_i1::g.22453::m.22453     | 4.47  | 3.09  | YES | excluded |
|  | Gene.3295::c1255_BT_Ma_ar_201_g1_i2::g.3295::m.3295        | 4.76  | 3.28  | NO  |          |
|  | Gene.12182::c4294_BT_Ma_ar_201_g1_i1::g.12182::m.12182     | 4.10  | 2.30  | YES |          |
|  | Gene.18709::c5579_BT_Ma_ar_201_g1_i2::g.18709::m.18709     | 28.81 | 0.00  | NO  | excluded |
|  | Gene.26194::c6824_BT_Ma_ar_201_g1_i1::g.26194::m.26194     | 4.51  | 1.34  | NO  |          |
|  | Gene.18124::c5442_BT_Ma_ar_201_g1_i1::g.18124::m.18124     | 3.97  | 2.71  | YES |          |
|  | Gene.119365::c21858_BT_Ma_ar_201_g1_i1::g.119365::m.119365 | 24.81 | 30.19 | NO  | excluded |
|  | Gene.55825::c10084_BT_Ma_ar_201_g3_i1::g.55825::m.55825    | 3.08  | 1.70  | YES |          |
|  | Gene.12102::c4277_BT_Ma_ar_201_g1_i2::g.12102::m.12102     | 4.52  | 2.58  | NO  |          |
|  | Gene.119306::c21826_BT_Ma_ar_201_g1_i1::g.119306::m.119306 | 4.84  | 4.14  | NO  | excluded |
|  | Gene.51835::c9714_BT_Ma_ar_201_g1_i2::g.51835::m.51835     | 10.28 | 1.64  | NO  |          |
|  | Gene.6445::c2265_BT_Ma_ar_201_g1_i1::g.6445::m.6445        | 4.06  | 2.42  | YES |          |
|  | Gene.12096::c4277_BT_Ma_ar_201_g1_i1::g.12096::m.12096     | 4.76  | 1.12  | NO  | excluded |
|  | Gene.41464::c8738_BT_Ma_ar_201_g1_i1::g.41464::m.41464     | 7.90  | 5.65  | NO  |          |
|  | Gene.51165::c9659_BT_Ma_ar_201_g1_i1::g.51165::m.51165     | 2.70  | 1.35  | YES |          |
|  | Gene.149454::c50055_BT_Ma_ar_201_g1_i1::g.149454::m.149454 | 23.04 | 53.74 | NO  | excluded |
|  | Gene.157304::c57956_BT_Ma_ar_201_g1_i1::g.157304::m.157304 | 14.14 | 24.96 | NO  |          |
|  | Gene.153843::c55121_BT_Ma_ar_201_g1_i1::g.153843::m.153843 | 3.69  | 2.09  | NO  |          |
|  | Gene.1490::c545_BT_Ma_ar_201_g1_i1::g.1490::m.1490         | 3.43  | 2.80  | NO  | excluded |
|  | Gene.33687::c7857_BT_Ma_ar_201_g1_i1::g.33687::m.33687     | 3.35  | 1.67  | YES |          |
|  | Gene.124705::c26460_BT_Ma_ar_201_g1_i1::g.124705::m.124705 | 10.63 | 6.32  | NO  |          |
|  | Gene.39613::c8536_BT_Ma_ar_201_g1_i1::g.39613::m.39613     | 6.56  | 1.37  | NO  | excluded |
|  | Gene.40561::c8634_BT_Ma_ar_201_g1_i1::g.40561::m.40561     | 2.67  | 2.04  | NO  |          |
|  | Gene.15488::c4986_BT_Ma_ar_201_g1_i2::g.15488::m.15488     | 2.09  | 0.99  | YES |          |
|  | Gene.123597::c25138_BT_Ma_ar_201_g1_i1::g.123597::m.123597 | 10.02 | 10.81 | NO  | excluded |
|  | Gene.1995::c723_BT_Ma_ar_201_g1_i1::g.1995::m.1995         | 2.06  | 1.30  | NO  |          |
|  | Gene.3293::c1255_BT_Ma_ar_201_g1_i1::g.3293::m.3293        | 3.32  | 0.00  | NO  |          |
|  | Gene.10790::c3950_BT_Ma_ar_201_g1_i1::g.10790::m.10790     | 3.22  | 3.71  | NO  | excluded |
|  | Gene.121059::c22897_BT_Ma_ar_201_g1_i1::g.121059::m.121059 | 4.09  | 2.14  | NO  |          |
|  | Gene.1436::c528_BT_Ma_ar_201_g1_i1::g.1436::m.1436         | 1.91  | 1.20  | YES |          |
|  | Gene.137313::c38531_BT_Ma_ar_201_g1_i1::g.137313::m.137313 | 1.93  | 1.59  | NO  | excluded |
|  | Gene.119922::c22165_BT_Ma_ar_201_g1_i1::g.119922::m.119922 | 3.56  | 4.81  | NO  |          |
|  | Gene.153744::c55051_BT_Ma_ar_201_g1_i1::g.153744::m.153744 | 1.66  | 1.24  | NO  |          |
|  | Gene.156195::c56923_BT_Ma_ar_201_g1_i1::g.156195::m.156195 | 1.79  | 1.63  | NO  | excluded |
|  | Gene.145017::c46255_BT_Ma_ar_201_g1_i1::g.145017::m.145017 | 5.98  | 21.84 | NO  |          |
|  | Gene.159071::c60342_BT_Ma_ar_201_g1_i1::g.159071::m.159071 | 4.73  | 9.22  | NO  |          |
|  | Gene.113279::c15250_BT_Ma_ar_201_g1_i1::g.113279::m.113279 | 1.86  | 1.87  | NO  | excluded |
|  | Gene.119324::c21833_BT_Ma_ar_201_g1_i1::g.119324::m.119324 | 2.81  | 6.16  | NO  |          |
|  | Gene.126400::c28481_BT_Ma_ar_201_g1_i1::g.126400::m.126400 | 1.51  | 0.96  | NO  |          |
|  | Gene.128053::c29469_BT_Ma_ar_201_g1_i1::g.128053::m.128053 | 1.29  | 1.29  | NO  | excluded |
|  | Gene.155391::c56261_BT_Ma_ar_201_g1_i1::g.155391::m.155391 | 1.11  | 0.57  | NO  |          |
|  | Gene.134787::c36968_BT_Ma_ar_201_g1_i1::g.134787::m.134787 | 1.45  | 1.32  | NO  |          |
|  | Gene.143418::c45395_BT_Ma_ar_201_g1_i1::g.143418::m.143418 | 1.44  | 0.78  | NO  | excluded |
|  | Gene.155860::c56665_BT_Ma_ar_201_g1_i1::g.155860::m.155860 | 1.05  | 0.90  | NO  |          |
|  | Gene.122735::c24250_BT_Ma_ar_201_g1_i1::g.122735::m.122735 | 1.17  | 0.83  | NO  |          |
|  | Gene.131575::c32545_BT_Ma_ar_201_g1_i1::g.131575::m.131575 | 1.71  | 1.70  | NO  | excluded |
|  | Gene.9480::c3417_BT_Ma_ar_201_g1_i1::g.9480::m.9480        | 1.61  | 1.64  | NO  |          |
|  | Gene.9486::c3417_BT_Ma_ar_201_g1_i2::g.9486::m.9486        | 1.61  | 1.64  | NO  |          |
|  | Gene.119325::c21833_BT_Ma_ar_201_g1_i1::g.119325::m.119325 | 1.89  | 4.83  | NO  | excluded |
|  | Gene.10661::c3899_BT_Ma_ar_201_g1_i1::g.10661::m.10661     | 1.28  | 1.51  | NO  |          |
|  | Gene.114145::c16000_BT_Ma_ar_201_g1_i1::g.114145::m.114145 | 1.23  | 1.28  | NO  |          |
|  | Gene.6462::c2270_BT_Ma_ar_201_g1_i1::g.6462::m.6462        | 1.18  | 0.77  | NO  | excluded |
|  | Gene.130107::c31106_BT_Ma_ar_201_g1_i1::g.130107::m.130107 | 1.33  | 0.63  | NO  |          |
|  | Gene.154627::c55644_BT_Ma_ar_201_g1_i1::g.154627::m.154627 | 1.31  | 1.56  | NO  |          |
|  | Gene.158634::c59619_BT_Ma_ar_201_g1_i1::g.158634::m.158634 | 1.77  | 3.19  | NO  | excluded |
|  | Gene.120696::c22671_BT_Ma_ar_201_g1_i1::g.120696::m.120696 | 1.54  | 2.61  | NO  |          |
|  | Gene.133502::c34879_BT_Ma_ar_201_g1_i1::g.133502::m.133502 | 1.36  | 0.80  | NO  |          |
|  | Gene.154399::c55485_BT_Ma_ar_201_g1_i1::g.154399::m.154399 | 1.36  | 1.61  | NO  | excluded |
|  | Gene.111655::c14095_BT_Ma_ar_201_g1_i1::g.111655::m.111655 | 0.98  | 0.96  | NO  |          |
|  | Gene.9212::c3304_BT_Ma_ar_201_g1_i1::g.9212::m.9212        | 1.07  | 0.86  | NO  |          |
|  | Gene.122172::c23753_BT_Ma_ar_201_g1_i1::g.122172::m.122172 | 1.36  | 3.56  | NO  | excluded |
|  | Gene.109512::c12903_BT_Ma_ar_201_g1_i1::g.109512::m.109512 | 1.31  | 1.61  | NO  |          |
|  | Gene.146857::c47569_BT_Ma_ar_201_g1_i1::g.146857::m.146857 | 0.89  | 1.40  | NO  |          |
|  | Gene.152953::c54624_BT_Ma_ar_201_g1_i1::g.152953::m.152953 | 1.39  | 2.11  | NO  | excluded |
|  | Gene.156219::c56949_BT_Ma_ar_201_g1_i1::g.156219::m.156219 | 1.09  | 1.26  | NO  |          |
|  | Gene.158335::c59201_BT_Ma_ar_201_g1_i1::g.158335::m.158335 | 1.06  | 1.18  | NO  |          |
|  | Gene.141997::c43361_BT_Ma_ar_201_g1_i1::g.141997::m.141997 | 1.18  | 3.40  | NO  | excluded |
|  | Gene.130412::c31398_BT_Ma_ar_201_g1_i1::g.130412::m.130412 | 1.20  | 2.11  | NO  |          |
|  | Gene.133251::c34529_BT_Ma_ar_201_g1_i1::g.133251::m.133251 | 1.98  | 10.96 | NO  |          |
|  | Gene.137986::c39026_BT_Ma_ar_201_g1_i1::g.137986::m.137986 | 0.92  | 1.57  | NO  | excluded |
|  | Gene.146528::c47313_BT_Ma_ar_201_g1_i1::g.146528::m.146528 | 0.82  | 1.27  | NO  |          |

|                  |                                                            |        |        |     |          |
|------------------|------------------------------------------------------------|--------|--------|-----|----------|
|                  | Gene.147327::c47936_BT_Ma_ar_201_g1_i1::g.147327::m.147327 | 0.97   | 2.20   | NO  |          |
|                  | Gene.124025::c25602_BT_Ma_ar_201_g1_i1::g.124025::m.124025 | 0.81   | 1.08   | NO  |          |
|                  | Gene.137069::c38349_BT_Ma_ar_201_g1_i1::g.137069::m.137069 | 0.76   | 0.97   | NO  |          |
|                  | Gene.110477::c13341_BT_Ma_ar_201_g1_i1::g.110477::m.110477 | 0.85   | 0.94   | NO  |          |
|                  | Gene.113310::c15272_BT_Ma_ar_201_g1_i1::g.113310::m.113310 | 1.36   | 3.00   | NO  |          |
|                  | Gene.114597::c16436_BT_Ma_ar_201_g1_i1::g.114597::m.114597 | 0.82   | 2.20   | NO  |          |
|                  | Gene.116837::c19009_BT_Ma_ar_201_g1_i1::g.116837::m.116837 | 0.79   | 0.82   | NO  |          |
|                  | Gene.142097::c43512_BT_Ma_ar_201_g1_i1::g.142097::m.142097 | 0.82   | 0.44   | NO  |          |
|                  | Gene.117195::c19440_BT_Ma_ar_201_g1_i1::g.117195::m.117195 | 0.85   | 1.17   | NO  |          |
|                  | Gene.138146::c39156_BT_Ma_ar_201_g1_i1::g.138146::m.138146 | 1.04   | 1.89   | NO  |          |
|                  | Gene.149616::c50233_BT_Ma_ar_201_g1_i1::g.149616::m.149616 | 1.09   | 3.22   | NO  |          |
|                  | Gene.112958::c14992_BT_Ma_ar_201_g1_i1::g.112958::m.112958 | 0.76   | 1.70   | NO  |          |
|                  | Gene.113894::c15791_BT_Ma_ar_201_g1_i1::g.113894::m.113894 | 0.57   | 0.32   | NO  |          |
|                  | Gene.134294::c36182_BT_Ma_ar_201_g1_i1::g.134294::m.134294 | 0.80   | 1.28   | NO  |          |
|                  | Gene.146351::c47192_BT_Ma_ar_201_g1_i1::g.146351::m.146351 | 1.09   | 1.42   | NO  |          |
|                  | Gene.15487::c4986_BT_Ma_ar_201_g1_i1::g.15487::m.15487     | 0.80   | 0.00   | NO  |          |
|                  | Gene.158813::c59871_BT_Ma_ar_201_g1_i1::g.158813::m.158813 | 1.16   | 1.68   | NO  |          |
|                  | Gene.137596::c38731_BT_Ma_ar_201_g1_i1::g.137596::m.137596 | 0.97   | 4.27   | NO  |          |
|                  | Gene.140516::c41485_BT_Ma_ar_201_g1_i1::g.140516::m.140516 | 0.54   | 0.72   | NO  |          |
|                  | Gene.157641::c58310_BT_Ma_ar_201_g1_i1::g.157641::m.157641 | 0.72   | 1.97   | NO  |          |
|                  | Gene.125096::c27059_BT_Ma_ar_201_g1_i1::g.125096::m.125096 | 0.81   | 0.00   | NO  |          |
|                  | Gene.132617::c33701_BT_Ma_ar_201_g1_i1::g.132617::m.132617 | 1.07   | 0.00   | NO  |          |
|                  | Gene.133874::c35490_BT_Ma_ar_201_g1_i1::g.133874::m.133874 | 0.56   | 1.53   | NO  |          |
|                  | Gene.141222::c42331_BT_Ma_ar_201_g1_i1::g.141222::m.141222 | 1.09   | 2.97   | NO  |          |
|                  | Gene.147082::c47749_BT_Ma_ar_201_g1_i1::g.147082::m.147082 | 0.71   | 1.75   | NO  |          |
|                  | Gene.150965::c52010_BT_Ma_ar_201_g1_i1::g.150965::m.150965 | 0.74   | 1.97   | NO  |          |
|                  | Gene.154986::c55936_BT_Ma_ar_201_g1_i1::g.154986::m.154986 | 1.02   | 4.82   | NO  |          |
|                  | Gene.114371::c16221_BT_Ma_ar_201_g1_i1::g.114371::m.114371 | 0.59   | 2.43   | NO  |          |
|                  | Gene.124673::c26406_BT_Ma_ar_201_g1_i1::g.124673::m.124673 | 0.50   | 1.10   | NO  |          |
|                  | Gene.125945::c28291_BT_Ma_ar_201_g1_i1::g.125945::m.125945 | 1.01   | 0.00   | NO  |          |
|                  | Gene.133089::c34325_BT_Ma_ar_201_g1_i1::g.133089::m.133089 | 0.59   | 2.43   | NO  |          |
|                  | Gene.138344::c39317_BT_Ma_ar_201_g1_i1::g.138344::m.138344 | 0.72   | 1.35   | NO  |          |
|                  | Gene.151941::c53598_BT_Ma_ar_201_g1_i1::g.151941::m.151941 | 0.65   | 2.05   | NO  |          |
|                  | Gene.156474::c57138_BT_Ma_ar_201_g1_i1::g.156474::m.156474 | 0.80   | 1.88   | NO  |          |
|                  | Gene.158262::c59097_BT_Ma_ar_201_g1_i1::g.158262::m.158262 | 0.58   | 0.00   | NO  |          |
|                  | Gene.111601::c14064_BT_Ma_ar_201_g1_i1::g.111601::m.111601 | 0.60   | 0.00   | NO  |          |
|                  | Gene.116311::c18279_BT_Ma_ar_201_g1_i1::g.116311::m.116311 | 0.75   | 5.11   | NO  |          |
|                  | Gene.122591::c24117_BT_Ma_ar_201_g1_i1::g.122591::m.122591 | 0.55   | 0.00   | NO  |          |
|                  | Gene.125403::c27559_BT_Ma_ar_201_g1_i1::g.125403::m.125403 | 0.59   | 1.28   | NO  |          |
|                  | Gene.126349::c28450_BT_Ma_ar_201_g1_i1::g.126349::m.126349 | 0.64   | 5.04   | NO  |          |
|                  | Gene.128266::c29630_BT_Ma_ar_201_g1_i1::g.128266::m.128266 | 0.59   | 3.85   | NO  |          |
|                  | Gene.131259::c32224_BT_Ma_ar_201_g1_i1::g.131259::m.131259 | 0.59   | 0.00   | NO  |          |
|                  | Gene.135506::c37319_BT_Ma_ar_201_g1_i1::g.135506::m.135506 | 0.71   | 2.27   | NO  |          |
|                  | Gene.147050::c47723_BT_Ma_ar_201_g1_i1::g.147050::m.147050 | 0.62   | 1.50   | NO  |          |
|                  | Gene.149245::c49820_BT_Ma_ar_201_g1_i1::g.149245::m.149245 | 0.63   | 1.58   | NO  |          |
|                  | Gene.151173::c52292_BT_Ma_ar_201_g1_i1::g.151173::m.151173 | 0.64   | 0.00   | NO  |          |
|                  | Gene.159205::c60618_BT_Ma_ar_201_g1_i1::g.159205::m.159205 | 0.60   | 1.35   | NO  |          |
|                  | Gene.117452::c19777_BT_Ma_ar_201_g1_i1::g.117452::m.117452 | 0.44   | 0.00   | NO  |          |
|                  | Gene.671::c216_BT_Ma_ar_201_g1_i1::g.671::m.671            | 0.64   | 18.65  | NO  |          |
|                  | Gene.134266::c36126_BT_Ma_ar_201_g1_i1::g.134266::m.134266 | 0.48   | 1.35   | NO  |          |
|                  | Gene.141252::c42369_BT_Ma_ar_201_g1_i1::g.141252::m.141252 | 0.54   | 0.00   | NO  |          |
|                  | Gene.149203::c49776_BT_Ma_ar_201_g1_i1::g.149203::m.149203 | 0.50   | 0.00   | NO  |          |
|                  | Gene.117199::c19446_BT_Ma_ar_201_g1_i1::g.117199::m.117199 | 0.34   | 0.00   | NO  |          |
|                  | Gene.128409::c29745_BT_Ma_ar_201_g1_i1::g.128409::m.128409 | 0.17   | 7.33   | NO  |          |
| Phospholipase A2 | Gene.8694::c3153_BT_Ma_ar_201_g1_i1::g.8694::m.8694        | 23.12  | 16.70  | NO  |          |
|                  | Gene.14173::c4695_BT_Ma_ar_201_g1_i1::g.14173::m.14173     | 24.69  | 16.79  | YES |          |
|                  | Gene.64466::c10740_BT_Ma_ar_201_g1_i2::g.64466::m.64466    | 8.62   | 5.08   | YES |          |
|                  | Gene.28407::c7179_BT_Ma_ar_201_g1_i1::g.28407::m.28407     | 5.79   | 3.82   | NO  |          |
|                  | Gene.16555::c5152_BT_Ma_ar_201_g1_i1::g.16555::m.16555     | 3.90   | 3.19   | NO  |          |
|                  | Gene.30::c29_BT_Ma_ar_201_g1_i1::g.30::m.30                | 2.06   | 1.30   | NO  |          |
|                  | Gene.64460::c10740_BT_Ma_ar_201_g1_i1::g.64460::m.64460    | 3.98   | 1.32   | NO  |          |
|                  | Gene.137709::c38815_BT_Ma_ar_201_g1_i1::g.137709::m.137709 | 2.22   | 1.81   | NO  |          |
|                  | Gene.141097::c42185_BT_Ma_ar_201_g1_i1::g.141097::m.141097 | 0.50   | 7.33   | NO  |          |
| Pimplin          | Gene.153232::c54761_BT_Ma_ar_201_g1_i1::g.153232::m.153232 | 3.09   | 2.23   | NO  | excluded |
|                  | Gene.127906::c29389_BT_Ma_ar_201_g1_i1::g.127906::m.127906 | 1.93   | 1.94   | NO  | excluded |
| Serpin           | Gene.58837::c10333_BT_Ma_ar_201_g1_i2::g.58837::m.58837    | 414.34 | 190.71 | YES |          |
|                  | Gene.58834::c10333_BT_Ma_ar_201_g1_i1::g.58834::m.58834    | 400.99 | 61.36  | YES |          |
|                  | Gene.58675::c10321_BT_Ma_ar_201_g1_i1::g.58675::m.58675    | 265.68 | 180.00 | YES |          |
|                  | Gene.118611::c21505_BT_Ma_ar_201_g1_i1::g.118611::m.118611 | 146.46 | 95.84  | NO  |          |
|                  | Gene.22988::c6390_BT_Ma_ar_201_g1_i1::g.22988::m.22988     | 107.58 | 59.42  | NO  |          |
|                  | Gene.54731::c10000_BT_Ma_ar_201_g1_i1::g.54731::m.54731    | 95.06  | 59.91  | YES |          |
|                  | Gene.144723::c46061_BT_Ma_ar_201_g1_i1::g.144723::m.144723 | 61.22  | 40.39  | NO  |          |
|                  | Gene.15285::c4927_BT_Ma_ar_201_g1_i1::g.15285::m.15285     | 35.37  | 18.57  | YES |          |
|                  | Gene.15294::c4927_BT_Ma_ar_201_g1_i2::g.15294::m.15294     | 34.97  | 3.61   | YES |          |
|                  | Gene.16505::c5144_BT_Ma_ar_201_g1_i1::g.16505::m.16505     | 52.37  | 32.11  | YES |          |
|                  | Gene.3730::c1369_BT_Ma_ar_201_g1_i1::g.3730::m.3730        | 39.52  | 25.16  | NO  |          |
|                  | Gene.38185::c8389_BT_Ma_ar_201_g1_i1::g.38185::m.38185     | 36.68  | 27.16  | NO  |          |
|                  | Gene.53241::c9853_BT_Ma_ar_201_g1_i1::g.53241::m.53241     | 35.20  | 22.20  | YES |          |
|                  | Gene.53435::c9873_BT_Ma_ar_201_g1_i1::g.53435::m.53435     | 33.64  | 22.46  | YES |          |
|                  | Gene.77171::c11601_BT_Ma_ar_201_g1_i1::g.77171::m.77171    | 18.34  | 10.83  | YES |          |
|                  | Gene.85340::c12015_BT_Ma_ar_201_g1_i1::g.85340::m.85340    | 23.26  | 16.77  | NO  |          |
|                  | Gene.4898::c1762_BT_Ma_ar_201_g1_i1::g.4898::m.4898        | 22.77  | 15.80  | YES |          |
|                  | Gene.4856::c1737_BT_Ma_ar_201_g1_i1::g.4856::m.4856        | 44.71  | 32.72  | NO  |          |
|                  | Gene.56324::c10131_BT_Ma_ar_201_g1_i1::g.56324::m.56324    | 12.42  | 6.92   | NO  |          |
|                  | Gene.62902::c10638_BT_Ma_ar_201_g1_i1::g.62902::m.62902    | 10.16  | 4.75   | NO  |          |
|                  | Gene.62904::c10638_BT_Ma_ar_201_g1_i2::g.62904::m.62904    | 9.09   | 1.42   | NO  |          |
|                  | Gene.128031::c29451_BT_Ma_ar_201_g1_i1::g.128031::m.128031 | 7.64   | 4.89   | NO  |          |
|                  | Gene.56328::c10131_BT_Ma_ar_201_g1_i2::g.56328::m.56328    | 7.99   | 1.68   | NO  |          |
|                  | Gene.25731::c6773_BT_Ma_ar_201_g1_i1::g.25731::m.25731     | 8.14   | 44.53  | NO  |          |
|                  | Gene.9684::c3498_BT_Ma_ar_201_g1_i1::g.9684::m.9684        | 5.01   | 3.53   | NO  |          |
|                  | Gene.9686::c3498_BT_Ma_ar_201_g1_i2::g.9686::m.9686        | 5.47   | 8.24   | NO  |          |
|                  | Gene.154294::c55412_BT_Ma_ar_201_g1_i1::g.154294::m.154294 | 7.11   | 11.96  | NO  |          |
|                  | Gene.127011::c28805_BT_Ma_ar_201_g1_i1::g.127011::m.127011 | 1.58   | 1.04   | NO  |          |
|                  | Gene.12678::c4392_BT_Ma_ar_201_g1_i1::g.12678::m.12678     | 5.38   | 42.74  | NO  |          |
|                  | Gene.7646::c2693_BT_Ma_ar_201_g1_i1::g.7646::m.7646        | 4.07   | 16.03  | NO  |          |

|                             |                                                            |        |        |     |  |
|-----------------------------|------------------------------------------------------------|--------|--------|-----|--|
|                             | Gene.120116::c22267_BT_Ma_ar_201_g1_i1::g.120116::m.120116 | 1.20   | 1.05   | NO  |  |
|                             | Gene.2430::c891_BT_Ma_ar_201_g1_i1::g.2430::m.2430         | 2.23   | 10.63  | NO  |  |
|                             | Gene.147289::c47907_BT_Ma_ar_201_g1_i1::g.147289::m.147289 | 1.91   | 1.99   | NO  |  |
|                             | Gene.5423::c1979_BT_Ma_ar_201_g1_i1::g.5423::m.5423        | 0.61   | 1.42   | YES |  |
| Sphingomyelinase            | Gene.74976::c11487_BT_Ma_ar_201_g1_i1::g.74976::m.74976    | 72.60  | 40.38  | YES |  |
|                             | Gene.88773::c12201_BT_Ma_ar_201_g1_i2::g.88773::m.88773    | 32.48  | 18.89  | NO  |  |
|                             | Gene.44686::c9056_BT_Ma_ar_201_g1_i2::g.44686::m.44686     | 26.49  | 3.88   | YES |  |
|                             | Gene.44697::c9056_BT_Ma_ar_201_g1_i3::g.44697::m.44697     | 26.49  | 3.88   | YES |  |
|                             | Gene.44713::c9056_BT_Ma_ar_201_g1_i5::g.44713::m.44713     | 26.49  | 3.88   | YES |  |
|                             | Gene.44674::c9056_BT_Ma_ar_201_g1_i1::g.44674::m.44674     | 25.61  | 3.37   | YES |  |
|                             | Gene.73701::c11407_BT_Ma_ar_201_g1_i1::g.73701::m.73701    | 15.81  | 9.62   | YES |  |
|                             | Gene.88779::c12201_BT_Ma_ar_201_g1_i3::g.88779::m.88779    | 18.10  | 5.34   | NO  |  |
|                             | Gene.88782::c12201_BT_Ma_ar_201_g1_i4::g.88782::m.88782    | 18.10  | 5.34   | NO  |  |
|                             |                                                            |        |        |     |  |
| SVWC-domain 1 (Asilidin8)   | Gene.24709::c6613_BT_Ma_ar_201_g1_i1::g.24709::m.24709     | 648.70 | 758.92 | YES |  |
|                             | Gene.24713::c6613_BT_Ma_ar_201_g1_i2::g.24713::m.24713     | 648.70 | 758.92 | YES |  |
|                             | Gene.58952::c10343_BT_Ma_ar_201_g2_i1::g.58952::m.58952    | 216.29 | 334.54 | YES |  |
|                             | Gene.112586::c14704_BT_Ma_ar_201_g1_i1::g.112586::m.112586 | 16.19  | 16.14  | NO  |  |
|                             | Gene.29303::c7294_BT_Ma_ar_201_g1_i2::g.29303::m.29303     | 10.44  | 15.71  | YES |  |
|                             | Gene.23018::c6396_BT_Ma_ar_201_g1_i3::g.23018::m.23018     | 2.63   | 5.19   | NO  |  |
|                             | Gene.140587::c41569_BT_Ma_ar_201_g1_i1::g.140587::m.140587 | 1.15   | 2.15   | NO  |  |
| SVWC-domain 2 (Asilidin9)   | Gene.38622::c8439_BT_Ma_ar_201_g1_i1::g.38622::m.38622     | 45.56  | 28.41  | YES |  |
|                             | Gene.38630::c8439_BT_Ma_ar_201_g1_i2::g.38630::m.38630     | 45.56  | 28.41  | YES |  |
|                             | Gene.33189::c7791_BT_Ma_ar_201_g1_i1::g.33189::m.33189     | 35.20  | 34.60  | YES |  |
|                             | Gene.4113::c1462_BT_Ma_ar_201_g1_i1::g.4113::m.4113        | 9.47   | 8.45   | YES |  |
|                             | Gene.12475::c4361_BT_Ma_ar_201_g1_i1::g.12475::m.12475     | 2.74   | 2.64   | YES |  |
| Venom acid phosphatase-like | Gene.75102::c11491_BT_Ma_ar_201_g2_i1::g.75102::m.75102    | 53.77  | 33.34  | YES |  |
|                             | Gene.50677::c9620_BT_Ma_ar_201_g1_i1::g.50677::m.50677     | 33.83  | 23.52  | NO  |  |
|                             | Gene.70606::c11198_BT_Ma_ar_201_g1_i1::g.70606::m.70606    | 28.22  | 8.45   | NO  |  |
|                             | Gene.70612::c11198_BT_Ma_ar_201_g1_i2::g.70612::m.70612    | 28.22  | 8.45   | NO  |  |
|                             | Gene.42899::c8888_BT_Ma_ar_201_g1_i1::g.42899::m.42899     | 13.62  | 7.11   | YES |  |
|                             | Gene.120657::c22646_BT_Ma_ar_201_g1_i1::g.120657::m.120657 | 1.41   | 0.45   | NO  |  |
|                             | Gene.138450::c39425_BT_Ma_ar_201_g1_i1::g.138450::m.138450 | 1.14   | 2.41   | NO  |  |
|                             |                                                            |        |        |     |  |
