# Supplementary material for: A Dipteran’s Novel Sucker Punch: Evolution of Arthropod Atypical Venom with a Neurotoxic Component in Robber Flies (Asilidae, Diptera)
Source: MDPI journal article supplement (doi:10.3390/toxins10010029), 2018-01-05
Supplement: s1 [file s1]

| Protein Class         | Contig ID                                                                                                                                                                                                                                                                                                                                                                                                                                                                                                                                                                                                                                                                                                                                                                                                                                                                                                                                                                                                                                                                                                            | TPM - Segemehl                                                                                                                                         | TPM - Kallisto                                                                                                                                         | Signal Peptide                                                                                                    | Protein Hit                                                                                                    | Protein Name      | false positive |
|-----------------------|----------------------------------------------------------------------------------------------------------------------------------------------------------------------------------------------------------------------------------------------------------------------------------------------------------------------------------------------------------------------------------------------------------------------------------------------------------------------------------------------------------------------------------------------------------------------------------------------------------------------------------------------------------------------------------------------------------------------------------------------------------------------------------------------------------------------------------------------------------------------------------------------------------------------------------------------------------------------------------------------------------------------------------------------------------------------------------------------------------------------|--------------------------------------------------------------------------------------------------------------------------------------------------------|--------------------------------------------------------------------------------------------------------------------------------------------------------|-------------------------------------------------------------------------------------------------------------------|----------------------------------------------------------------------------------------------------------------|-------------------|----------------|
| Aegyptin              | no hit                                                                                                                                                                                                                                                                                                                                                                                                                                                                                                                                                                                                                                                                                                                                                                                                                                                                                                                                                                                                                                                                                                               | 0                                                                                                                                                      | 0                                                                                                                                                      | X                                                                                                                 | X                                                                                                              |                   |                |
| Alpha-amylase         | Gene.32383:c6358_g1_i1_VG_Eu_ru_204:g.32383:m.32383                                                                                                                                                                                                                                                                                                                                                                                                                                                                                                                                                                                                                                                                                                                                                                                                                                                                                                                                                                                                                                                                  | 8095.60                                                                                                                                                | 4447.21                                                                                                                                                | YES                                                                                                               | NO                                                                                                             |                   |                |
| Anophelin             | no hit                                                                                                                                                                                                                                                                                                                                                                                                                                                                                                                                                                                                                                                                                                                                                                                                                                                                                                                                                                                                                                                                                                               | 0                                                                                                                                                      | 0                                                                                                                                                      | X                                                                                                                 | X                                                                                                              |                   |                |
| Apyrase               | Gene.94938:c23568_g1_i1_VG_Eu_ru_204:g.94938:m.94938<br>Gene.88055:c16877_g1_i1_VG_Eu_ru_204:g.88055:m.88055<br>Gene.99726:c27472_g1_i1_VG_Eu_ru_204:g.99726:m.99726<br>Gene.90958:c18849_g1_i1_VG_Eu_ru_204:g.90958:m.90958<br>Gene.114344:c41461_g1_i1_VG_Eu_ru_204:g.114344:m.114344<br>Gene.94413:c23299_g1_i1_VG_Eu_ru_204:g.94413:m.94413                                                                                                                                                                                                                                                                                                                                                                                                                                                                                                                                                                                                                                                                                                                                                                      | 0.81<br>0.52<br>0.39<br>0.20<br>0.22<br>0.21                                                                                                           | 0.47<br>0.27<br>0.18<br>0.21<br>0.98<br>0.57                                                                                                           | NO<br>NO<br>NO<br>NO<br>NO<br>NO                                                                                  | NO<br>NO<br>NO<br>NO<br>NO<br>NO                                                                               |                   |                |
| CAP                   | Gene.56292:c8081_g1_i1_VG_Eu_ru_204:g.56292:m.56292<br>Gene.25434:c5637_g1_i1_VG_Eu_ru_204:g.25434:m.25434<br>Gene.56304:c8081_g1_i2_VG_Eu_ru_204:g.56304:m.56304<br>Gene.120487:c47127_g1_i1_VG_Eu_ru_204:g.120487:m.120487<br>Gene.30179:c6142_g1_i2_VG_Eu_ru_204:g.30179:m.30179<br>Gene.30174:c6142_g1_i1_VG_Eu_ru_204:g.30174:m.30174<br>Gene.119506:c46271_g1_i1_VG_Eu_ru_204:g.119506:m.119506<br>Gene.114899:c42170_g1_i1_VG_Eu_ru_204:g.114899:m.114899                                                                                                                                                                                                                                                                                                                                                                                                                                                                                                                                                                                                                                                     | 20.08<br>33.29<br>17.79<br>18.52<br>1.53<br>0.98<br>0.35<br>0.26                                                                                       | 11.32<br>21.55<br>0.28<br>10.26<br>1.16<br>0.00<br>0.66<br>0.00                                                                                        | NO<br>YES<br>NO<br>NO<br>YES<br>YES<br>NO<br>NO                                                                   | NO<br>NO<br>NO<br>NO<br>NO<br>NO<br>NO<br>NO                                                                   |                   |                |
| Chitinase             | Gene.50699:c7760_g1_i1_VG_Eu_ru_204:g.50699:m.50699<br>Gene.33640:c6465_g1_i1_VG_Eu_ru_204:g.33640:m.33640<br>Gene.74512:c8891_g1_i1_VG_Eu_ru_204:g.74512:m.74512<br>Gene.119146:c45986_g1_i1_VG_Eu_ru_204:g.119146:m.119146<br>Gene.58313:c8192_g1_i1_VG_Eu_ru_204:g.58313:m.58313<br>Gene.1064:c337_g1_i1_VG_Eu_ru_204:g.1064:m.1064<br>Gene.7116:c2115_g1_i1_VG_Eu_ru_204:g.7116:m.7116<br>Gene.105109:c32613_g1_i1_VG_Eu_ru_204:g.105109:m.105109<br>Gene.118790:c45742_g1_i1_VG_Eu_ru_204:g.118790:m.118790<br>Gene.106754:c34301_g1_i1_VG_Eu_ru_204:g.106754:m.106754<br>Gene.117565:c45001_g1_i1_VG_Eu_ru_204:g.117565:m.117565<br>Gene.116959:c44720_g1_i1_VG_Eu_ru_204:g.116959:m.116959<br>Gene.11852:c3557_g1_i1_VG_Eu_ru_204:g.11852:m.11852<br>Gene.91913:c19802_g1_i1_VG_Eu_ru_204:g.91913:m.91913<br>Gene.93109:c21215_g1_i1_VG_Eu_ru_204:g.93109:m.93109<br>Gene.113432:c40431_g1_i1_VG_Eu_ru_204:g.113432:m.113432<br>Gene.122395:c49222_g1_i1_VG_Eu_ru_204:g.122395:m.122395<br>Gene.117154:c44827_g1_i1_VG_Eu_ru_204:g.117154:m.117154<br>Gene.116091:c44044_g1_i1_VG_Eu_ru_204:g.116091:m.116091 | 218.71<br>2.89<br>9.46<br>8.94<br>4.75<br>7.56<br>0.96<br>0.83<br>0.59<br>1.31<br>0.45<br>0.35<br>0.39<br>0.52<br>0.20<br>0.31<br>0.23<br>0.25<br>0.15 | 111.70<br>0.93<br>5.20<br>4.70<br>2.74<br>4.64<br>0.64<br>0.48<br>0.54<br>1.11<br>0.54<br>0.23<br>0.21<br>0.94<br>0.57<br>1.19<br>0.44<br>1.91<br>0.00 | YES<br>NO<br>YES<br>NO<br>NO<br>NO<br>NO<br>NO<br>NO<br>NO<br>NO<br>NO<br>NO<br>YES<br>NO<br>NO<br>NO<br>NO<br>NO | NO<br>NO<br>NO<br>NO<br>NO<br>NO<br>NO<br>NO<br>NO<br>NO<br>NO<br>NO<br>NO<br>NO<br>NO<br>NO<br>NO<br>NO<br>NO |                   |                |
| Conoporin-like        | no hit                                                                                                                                                                                                                                                                                                                                                                                                                                                                                                                                                                                                                                                                                                                                                                                                                                                                                                                                                                                                                                                                                                               | 0                                                                                                                                                      | 0                                                                                                                                                      | X                                                                                                                 | X                                                                                                              |                   |                |
| Csalpha/beta defensin | Gene.23259:c5354_g1_i1_VG_Eu_ru_204:g.23259:m.23259<br>Gene.918:c290_g1_i1_VG_Eu_ru_204:g.918:m.918<br>Gene.101988:c30522_g1_i1_VG_Eu_ru_204:g.101988:m.101988                                                                                                                                                                                                                                                                                                                                                                                                                                                                                                                                                                                                                                                                                                                                                                                                                                                                                                                                                       | 3.45<br>1.11<br>0.77                                                                                                                                   | 3.81<br>1.99<br>1.31                                                                                                                                   | NO<br>NO<br>NO                                                                                                    | NO<br>NO<br>NO                                                                                                 |                   |                |
| Cystatin              | no hit                                                                                                                                                                                                                                                                                                                                                                                                                                                                                                                                                                                                                                                                                                                                                                                                                                                                                                                                                                                                                                                                                                               | 0                                                                                                                                                      | 0                                                                                                                                                      | X                                                                                                                 | X                                                                                                              |                   |                |
| dICKS's               | Gene.14819:c4098_g1_i1_VG_Eu_ru_204:g.14819:m.14819                                                                                                                                                                                                                                                                                                                                                                                                                                                                                                                                                                                                                                                                                                                                                                                                                                                                                                                                                                                                                                                                  | 2.45                                                                                                                                                   | 1.57                                                                                                                                                   | YES                                                                                                               | NO                                                                                                             |                   |                |
| Disintegrine-like     | no hit                                                                                                                                                                                                                                                                                                                                                                                                                                                                                                                                                                                                                                                                                                                                                                                                                                                                                                                                                                                                                                                                                                               | 0                                                                                                                                                      | 0                                                                                                                                                      | X                                                                                                                 | X                                                                                                              |                   |                |
| Echotoxin-like        | no hit                                                                                                                                                                                                                                                                                                                                                                                                                                                                                                                                                                                                                                                                                                                                                                                                                                                                                                                                                                                                                                                                                                               | 0                                                                                                                                                      | 0                                                                                                                                                      | X                                                                                                                 | X                                                                                                              |                   |                |
| Gigantoxin-like       | no hit                                                                                                                                                                                                                                                                                                                                                                                                                                                                                                                                                                                                                                                                                                                                                                                                                                                                                                                                                                                                                                                                                                               | 0                                                                                                                                                      | 0                                                                                                                                                      | X                                                                                                                 |                                                                                                                |                   |                |
| Hyaluronidase         | Gene.43820:c7298_g1_i1_VG_Eu_ru_204:g.43820:m.43820<br>Gene.43838:c7298_g1_i3_VG_Eu_ru_204:g.43838:m.43838<br>Gene.43831:c7298_g1_i2_VG_Eu_ru_204:g.43831:m.43831<br>Gene.43850:c7298_g1_i4_VG_Eu_ru_204:g.43850:m.43850<br>Gene.86419:c15398_g1_i1_VG_Eu_ru_204:g.86419:m.86419                                                                                                                                                                                                                                                                                                                                                                                                                                                                                                                                                                                                                                                                                                                                                                                                                                     | 782.44<br>782.44<br>799.69<br>799.69<br>0.28                                                                                                           | 60.57<br>60.57<br>156.29<br>156.29<br>0.70                                                                                                             | NO<br>NO<br>YES<br>YES<br>NO                                                                                      | NO<br>NO<br>NO<br>NO<br>NO                                                                                     |                   |                |
| ICK's (Asilidin1)     | Gene.25482:c5644_g1_i1_VG_Eu_ru_204:g.25482:m.25482<br>Gene.6636:c1937_g1_i1_VG_Eu_ru_204:g.6636:m.6636<br>Gene.82712:c11039_g1_i1_VG_Eu_ru_204:g.82712:m.82712<br>Gene.25481:c5644_g1_i1_VG_Eu_ru_204:g.25481:m.25481<br>Gene.31380:c6259_g1_i1_VG_Eu_ru_204:g.31380:m.31380<br>Gene.14819:c4098_g1_i1_VG_Eu_ru_204:g.14819:m.14819<br>Gene.24414:c5508_g1_i1_VG_Eu_ru_204:g.24414:m.24414<br>Gene.9809:c2929_g1_i1_VG_Eu_ru_204:g.9809:m.9809<br>Gene.2787:c847_g1_i1_VG_Eu_ru_204:g.2787:m.2787<br>Gene.112880:c39870_g1_i1_VG_Eu_ru_204:g.112880:m.112880<br>Gene.122557:c49431_g1_i1_VG_Eu_ru_204:g.122557:m.122557                                                                                                                                                                                                                                                                                                                                                                                                                                                                                             | 7165.69<br>736.05<br>11.97<br>8.75<br>10.67<br>2.45<br>1.94<br>0.84<br>0.40<br>0.38<br>0.11                                                            | 10985.00<br>2538.30<br>22.97<br>10.67<br>28.06<br>1.57<br>5.86<br>1.39<br>1.22<br>1.01<br>0.51                                                         | NO<br>YES<br>YES<br>NO<br>YES<br>YES<br>YES<br>YES<br>YES<br>NO<br>NO                                             | YES<br>NO<br>NO<br>NO<br>NO<br>NO<br>NO<br>NO<br>NO<br>NO<br>NO                                                | U-Asilidin2-Eru1a |                |
| Kazal                 | Gene.64171:c8487_g1_i4_VG_Eu_ru_204:g.64171:m.64171<br>Gene.64169:c8487_g1_i3_VG_Eu_ru_204:g.64169:m.64169<br>Gene.64177:c8487_g1_i5_VG_Eu_ru_204:g.64177:m.64177<br>Gene.64166:c8487_g1_i1_VG_Eu_ru_204:g.64166:m.64166<br>Gene.121387:c86013_g1_i1_VG_Eu_ru_204:g.121387:m.121387<br>Gene.10788:c3201_g1_i1_VG_Eu_ru_204:g.10788:m.10788<br>Gene.2778:c838_g1_i1_VG_Eu_ru_204:g.2778:m.2778<br>Gene.109049:c37346_g1_i1_VG_Eu_ru_204:g.109049:m.109049<br>Gene.2219:c705_g1_i1_VG_Eu_ru_204:g.2219:m.2219<br>Gene.5756:c1772_g1_i1_VG_Eu_ru_204:g.5756:m.5756<br>Gene.104297:c31944_g1_i1_VG_Eu_ru_204:g.104297:m.104297<br>Gene.90025:c18099_g1_i1_VG_Eu_ru_204:g.90025:m.90025<br>Gene.87647:c16666_g1_i1_VG_Eu_ru_204:g.87647:m.87647<br>Gene.112380:c39391_g1_i1_VG_Eu_ru_204:g.112380:m.112380<br>Gene.93420:c21625_g1_i1_VG_Eu_ru_204:g.93420:m.93420<br>Gene.105292:c32803_g1_i1_VG_Eu_ru_204:g.105292:m.105292<br>Gene.82765:c11072_g1_i1_VG_Eu_ru_204:g.82765:m.82765                                                                                                                                     | 14.30<br>11.35<br>11.66<br>12.26<br>6.27<br>4.33<br>5.20<br>0.77<br>0.53<br>0.68<br>0.59<br>1.04<br>0.25<br>0.32<br>0.18<br>0.18                       | 10.16<br>0.76<br>0.59<br>1.13<br>6.27<br>3.00<br>6.08<br>0.36<br>0.31<br>0.46<br>0.25<br>1.81<br>0.22<br>0.51<br>0.42<br>1.25<br>0.00                  | YES<br>YES<br>YES<br>YES<br>YES<br>YES<br>NO<br>NO<br>NO<br>NO<br>YES<br>NO<br>NO<br>NO<br>NO<br>NO<br>NO         | NO<br>NO<br>NO<br>NO<br>NO<br>NO<br>NO<br>NO<br>NO<br>NO<br>NO<br>NO<br>NO<br>NO<br>NO<br>NO<br>NO             |                   |                |
| Kazal (vasotab-like)  | Gene.26724:c5793_g1_i1_VG_Eu_ru_204:g.26724:m.26724<br>Gene.120711:c47332_g1_i1_VG_Eu_ru_204:g.120711:m.120711<br>Gene.2219:c705_g1_i1_VG_Eu_ru_204:g.2219:m.2219<br>Gene.89427:c17662_g1_i1_VG_Eu_ru_204:g.89427:m.89427<br>Gene.103638:c31458_g1_i1_VG_Eu_ru_204:g.103638:m.103638                                                                                                                                                                                                                                                                                                                                                                                                                                                                                                                                                                                                                                                                                                                                                                                                                                 | 25.21<br>5.29<br>0.53<br>0.86<br>1.72                                                                                                                  | 49.94<br>8.56<br>0.31<br>0.62<br>3.68                                                                                                                  | YES<br>NO<br>NO<br>NO<br>NO                                                                                       | NO<br>NO<br>NO<br>NO<br>NO                                                                                     |                   |                |
| Kunitz                | Gene.109565:c37539_g1_i1_VG_Eu_ru_204:g.109565:m.109565<br>Gene.13684:c3920_g1_i1_VG_Eu_ru_204:g.13684:m.13684<br>Gene.51541:c7810_g1_i1_VG_Eu_ru_204:g.51541:m.51541<br>Gene.51552:c7810_g1_i2_VG_Eu_ru_204:g.51552:m.51552<br>Gene.33831:c6485_g1_i2_VG_Eu_ru_204:g.33831:m.33831<br>Gene.80039:c9399_g1_i1_VG_Eu_ru_204:g.80039:m.80039<br>Gene.33829:c6485_g1_i1_VG_Eu_ru_204:g.33829:m.33829<br>Gene.84166:c12408_g1_i1_VG_Eu_ru_204:g.84166:m.84166<br>Gene.102284:c30672_g1_i1_VG_Eu_ru_204:g.102284:m.102284<br>Gene.85170:c13653_g1_i1_VG_Eu_ru_204:g.85170:m.85170<br>Gene.121027:c47646_g1_i1_VG_Eu_ru_204:g.121027:m.121027                                                                                                                                                                                                                                                                                                                                                                                                                                                                              | 13.32<br>10.41<br>1.25<br>1.18<br>2.13<br>3.88<br>2.33<br>0.63<br>0.88<br>0.54<br>0.53                                                                 | 9.81<br>7.24<br>0.56<br>0.16<br>2.84<br>5.82<br>0.00<br>0.42<br>1.52<br>0.88<br>0.26                                                                   | NO<br>YES<br>NO<br>NO<br>YES<br>YES<br>YES<br>NO<br>NO<br>YES<br>NO                                               | NO<br>NO<br>NO<br>NO<br>NO<br>NO<br>NO<br>NO<br>NO<br>NO<br>NO                                                 |                   |                |

|                             |                                                          |          |          |     |     |                                                                                                       |
|-----------------------------|----------------------------------------------------------|----------|----------|-----|-----|-------------------------------------------------------------------------------------------------------|
|                             | Gene.98032::c25729_g1_i1_VG_Eu_ru_204:g.98032:m.98032    | 0.46     | 0.92     | YES | NO  |                                                                                                       |
|                             | Gene.84542::c12869_g1_i1_VG_Eu_ru_204:g.84542:m.84542    | 0.41     | 0.82     | NO  | NO  |                                                                                                       |
|                             | Gene.84800::c13191_g1_i1_VG_Eu_ru_204:g.84800:m.84800    | 0.32     | 0.00     | NO  | NO  |                                                                                                       |
|                             | Gene.93932::c22414_g1_i1_VG_Eu_ru_204:g.93932:m.93932    | 0.22     | 0.73     | NO  | NO  |                                                                                                       |
|                             | Gene.115912::c43738_g1_i1_VG_Eu_ru_204:g.115912:m.115912 | 0.29     | 0.00     | NO  | NO  |                                                                                                       |
|                             | Gene.83789::c12013_g1_i1_VG_Eu_ru_204:g.83789:m.83789    | 0.17     | 0.00     | YES | NO  |                                                                                                       |
| Lectin c-type               | Gene.54596::c7978_g2_i1_VG_Eu_ru_204:g.54596:m.54596     | 102.91   | 49.58    | YES | NO  | excluded                                                                                              |
|                             | Gene.54625::c7978_g2_i2_VG_Eu_ru_204:g.54625:m.54625     | 97.33    | 6.08     | YES | NO  |                                                                                                       |
|                             | Gene.60435::c8303_g1_i1_VG_Eu_ru_204:g.60435:m.60435     | 8.58     | 4.45     | NO  | NO  |                                                                                                       |
|                             | Gene.24029::c5462_g1_i1_VG_Eu_ru_204:g.24029:m.24029     | 31.57    | 19.81    | YES | NO  |                                                                                                       |
|                             | Gene.67911::c8661_g1_i1_VG_Eu_ru_204:g.67911:m.67911     | 2.64     | 0.93     | NO  | NO  |                                                                                                       |
|                             | Gene.67931::c8661_g1_i4_VG_Eu_ru_204:g.67931:m.67931     | 5.35     | 1.25     | NO  | NO  |                                                                                                       |
|                             | Gene.67923::c8661_g1_i2_VG_Eu_ru_204:g.67923:m.67923     | 3.94     | 0.49     | NO  | NO  |                                                                                                       |
|                             | Gene.117399::c44930_g1_i1_VG_Eu_ru_204:g.117399:m.117399 | 2.49     | 2.01     | NO  | NO  |                                                                                                       |
|                             | Gene.35394::c6607_g1_i1_VG_Eu_ru_204:g.35394:m.35394     | 2.15     | 1.73     | YES | NO  |                                                                                                       |
|                             | Gene.79379::c9050_g1_i1_VG_Eu_ru_204:g.79379:m.79379     | 1.46     | 1.07     | YES | NO  |                                                                                                       |
|                             | Gene.96956::c24817_g1_i1_VG_Eu_ru_204:g.96956:m.96956    | 0.26     | 0.15     | NO  | NO  |                                                                                                       |
|                             | Gene.100146::c28002_g1_i1_VG_Eu_ru_204:g.100146:m.100146 | 0.38     | 1.01     | NO  | NO  |                                                                                                       |
|                             |                                                          |          |          |     |     |                                                                                                       |
|                             |                                                          |          |          |     |     |                                                                                                       |
|                             |                                                          |          |          |     |     |                                                                                                       |
|                             |                                                          |          |          |     |     |                                                                                                       |
| Lipocalin calycins          | Gene.95508::c23892_g1_i1_VG_Eu_ru_204:g.95508:m.95508    | 14.63    | 9.38     | YES | NO  |                                                                                                       |
|                             | Gene.22429::c5248_g1_i1_VG_Eu_ru_204:g.22429:m.22429     | 5.88     | 4.06     | YES | NO  |                                                                                                       |
|                             | Gene.93268::c21423_g1_i1_VG_Eu_ru_204:g.93268:m.93268    | 0.59     | 0.60     | NO  | NO  |                                                                                                       |
|                             | Gene.123561::c50908_g1_i1_VG_Eu_ru_204:g.123561:m.123561 | 0.33     | 0.29     | NO  | NO  |                                                                                                       |
|                             | Gene.1618::c565_g1_i1_VG_Eu_ru_204:g.1618:m.1618         | 0.26     | 0.13     | YES | NO  |                                                                                                       |
| Maxadilan-like              | no hit                                                   | 0        | 0        | X   | X   |                                                                                                       |
| MBF2-domain                 | Gene.4165::c1212_g1_i1_VG_Eu_ru_204:g.4165:m.4165        | 9127.06  | 8716.38  | YES | NO  |                                                                                                       |
|                             | Gene.4074::c1175_g6_i1_VG_Eu_ru_204:g.4074:m.4074        | 8346.96  | 10513.20 | YES | NO  |                                                                                                       |
|                             | Gene.116489::c44479_g1_i1_VG_Eu_ru_204:g.116489:m.116489 | 3665.55  | 3129.84  | NO  | NO  |                                                                                                       |
|                             | Gene.36327::c6704_g1_i1_VG_Eu_ru_204:g.36327:m.36327     | 765.45   | 774.40   | YES | NO  |                                                                                                       |
|                             | Gene.23269::c5357_g1_i1_VG_Eu_ru_204:g.23269:m.23269     | 400.44   | 233.46   | YES | NO  |                                                                                                       |
|                             | Gene.23275::c5357_g1_i2_VG_Eu_ru_204:g.23275:m.23275     | 400.44   | 233.46   | YES | NO  |                                                                                                       |
|                             | Gene.3256::c983_g1_i1_VG_Eu_ru_204:g.3256:m.3256         | 326.15   | 377.80   | YES | NO  |                                                                                                       |
|                             | Gene.29774::c6107_g1_i1_VG_Eu_ru_204:g.29774:m.29774     | 128.84   | 133.63   | YES | NO  |                                                                                                       |
|                             | Gene.17514::c4493_g1_i1_VG_Eu_ru_204:g.17514:m.17514     | 104.48   | 85.74    | YES | NO  |                                                                                                       |
|                             | Gene.102744::c30916_g1_i1_VG_Eu_ru_204:g.102744:m.102744 | 21.14    | 35.10    | NO  | NO  |                                                                                                       |
|                             |                                                          |          |          |     |     |                                                                                                       |
|                             |                                                          |          |          |     |     |                                                                                                       |
|                             |                                                          |          |          |     |     |                                                                                                       |
| Melittin-like               | no hit                                                   | 0        | 0        | X   | X   |                                                                                                       |
| Mu agatoxin-like            | no hit                                                   | 0        | 0        | X   | X   |                                                                                                       |
| Natterin-like (Asilidin10)  | Gene.8863::c2616_g1_i1_VG_Eu_ru_204:g.8863:m.8863        | 360.27   | 232.50   | NO  | NO  |                                                                                                       |
|                             | Gene.38911::c6949_g1_i1_VG_Eu_ru_204:g.38911:m.38911     | 207.42   | 152.24   | NO  | NO  |                                                                                                       |
|                             | Gene.50334::c7734_g1_i1_VG_Eu_ru_204:g.50334:m.50334     | 173.35   | 104.28   | NO  | NO  |                                                                                                       |
|                             | Gene.40271::c7041_g1_i2_VG_Eu_ru_204:g.40271:m.40271     | 124.30   | 33.19    | NO  | NO  |                                                                                                       |
|                             | Gene.40265::c7041_g1_i1_VG_Eu_ru_204:g.40265:m.40265     | 162.48   | 111.80   | NO  | NO  |                                                                                                       |
|                             |                                                          |          |          |     |     |                                                                                                       |
| Neurokinin-like             | no hit                                                   | 0        | 0        | X   | X   |                                                                                                       |
| Nitrophorin-like            | no hit                                                   | 0        | 0        | X   | X   |                                                                                                       |
| Novel protein 1 (Asilidin2) | Gene.94447::c23387_g1_i1_VG_Eu_ru_204:g.94447:m.94447    | 51106.96 | 31665.80 | YES | YES | U-Asilidin2-Eru1a<br>U-Asilidin2-Eru3a<br>U-Asilidin2-Eru3b<br>U-Asilidin2-Eru2a<br>U-Asilidin2-Eru4a |
|                             | Gene.46103::c7461_g2_i2_VG_Eu_ru_204:g.46103:m.46103     | 37141.21 | 20682.20 | YES | YES |                                                                                                       |
|                             | Gene.46097::c7461_g2_i1_VG_Eu_ru_204:g.46097:m.46097     | 36258.27 | 53.86    | YES | YES |                                                                                                       |
|                             | Gene.79411::c9061_g1_i1_VG_Eu_ru_204:g.79411:m.79411     | 31252.23 | 17001.90 | NO  | YES |                                                                                                       |
|                             | Gene.9035::c2674_g3_i1_VG_Eu_ru_204:g.9035:m.9035        | 33909.37 | 19163.10 | YES | YES |                                                                                                       |
|                             | Gene.8959::c2651_g5_i1_VG_Eu_ru_204:g.8959:m.8959        | 26367.31 | 15797.80 | YES | NO  |                                                                                                       |
|                             | Gene.2314::c726_g1_i1_VG_Eu_ru_204:g.2314:m.2314         | 14338.19 | 8246.11  | YES | NO  |                                                                                                       |
|                             | Gene.37863::c6854_g2_i1_VG_Eu_ru_204:g.37863:m.37863     | 4196.43  | 2561.53  | YES | NO  |                                                                                                       |
|                             | Gene.37864::c6854_g2_i1_VG_Eu_ru_204:g.37864:m.37864     | 81.59    | 62.05    | YES | NO  |                                                                                                       |
|                             | Gene.23725::c5413_g1_i1_VG_Eu_ru_204:g.23725:m.23725     | 5.55     | 3.41     | YES | NO  |                                                                                                       |
|                             | Gene.115324::c42846_g1_i1_VG_Eu_ru_204:g.115324:m.115324 | 1.64     | 1.63     | NO  | NO  |                                                                                                       |
|                             |                                                          |          |          |     |     |                                                                                                       |
|                             |                                                          |          |          |     |     |                                                                                                       |
|                             |                                                          |          |          |     |     |                                                                                                       |
| Novel protein (Asilidin3)   | Gene.14234::c4012_g1_i1_VG_Eu_ru_204:g.14234:m.14234     | 50168.40 | 65478.30 | YES | YES | U-Asilidin3-Eru1a                                                                                     |
| Novel protein (Asilidin4)   | Gene.8837::c2610_g3_i1_VG_Eu_ru_204:g.8837:m.8837        | 23893.20 | 39114.10 | YES | YES | U-Asilidin4-Eru1a                                                                                     |
| Novel protein (Asilidin5)   | Gene.79357::c9042_g2_i1_VG_Eu_ru_204:g.79357:m.79357     | 9686.63  | 5586.70  | YES | YES | U-Asilidin5-Eru1a                                                                                     |
| Novel protein (Asilidin6)   | Gene.87115::c16440_g1_i1_VG_Eu_ru_204:g.87115:m.87115    | 2430.98  | 1642.03  | NO  | NO  |                                                                                                       |
| Novel protein (Asilidin7)   | no hit                                                   | 0        | 0        | X   | X   |                                                                                                       |
| Peptidase M12               | Gene.62234::c8406_g1_i2_VG_Eu_ru_204:g.62234:m.62234     | 3.25     | 0.55     | NO  | NO  |                                                                                                       |
|                             | Gene.62264::c8406_g1_i5_VG_Eu_ru_204:g.62264:m.62264     | 3.91     | 0.00     | NO  | NO  |                                                                                                       |
|                             | Gene.62287::c8406_g1_i9_VG_Eu_ru_204:g.62287:m.62287     | 3.88     | 0.89     | NO  | NO  |                                                                                                       |
|                             | Gene.33027::c6414_g1_i3_VG_Eu_ru_204:g.33027:m.33027     | 6.93     | 1.51     | YES | NO  |                                                                                                       |
|                             | Gene.33023::c6414_g1_i1_VG_Eu_ru_204:g.33023:m.33023     | 7.16     | 1.39     | YES | NO  |                                                                                                       |
|                             | Gene.62283::c8406_g1_i8_VG_Eu_ru_204:g.62283:m.62283     | 4.07     | 0.21     | NO  | NO  |                                                                                                       |
|                             | Gene.62245::c8406_g1_i3_VG_Eu_ru_204:g.62245:m.62245     | 4.13     | 0.40     | NO  | NO  |                                                                                                       |
|                             | Gene.62252::c8406_g1_i4_VG_Eu_ru_204:g.62252:m.62252     | 4.13     | 0.40     | NO  | NO  |                                                                                                       |
|                             | Gene.33025::c6414_g1_i2_VG_Eu_ru_204:g.33025:m.33025     | 6.38     | 0.47     | NO  | NO  |                                                                                                       |
|                             | Gene.4544::c1347_g1_i1_VG_Eu_ru_204:g.4544:m.4544        | 1.75     | 0.29     | YES | NO  |                                                                                                       |
|                             | Gene.62253::c8406_g1_i4_VG_Eu_ru_204:g.62253:m.62253     | 2.70     | 0.21     | NO  | NO  |                                                                                                       |
|                             | Gene.33031::c6414_g1_i4_VG_Eu_ru_204:g.33031:m.33031     | 5.69     | 1.01     | NO  | NO  |                                                                                                       |
|                             | Gene.8652::c2549_g1_i1_VG_Eu_ru_204:g.8652:m.8652        | 0.85     | 0.47     | NO  | NO  |                                                                                                       |
|                             | Gene.8687::c2562_g1_i1_VG_Eu_ru_204:g.8687:m.8687        | 0.93     | 0.61     | NO  | NO  |                                                                                                       |
|                             | Gene.109216::c37411_g1_i1_VG_Eu_ru_204:g.109216:m.109216 | 0.89     | 0.61     | NO  | NO  |                                                                                                       |
|                             | Gene.90532::c18508_g1_i1_VG_Eu_ru_204:g.90532:m.90532    | 0.56     | 0.32     | NO  | NO  |                                                                                                       |
|                             | Gene.79316::c9026_g1_i1_VG_Eu_ru_204:g.79316:m.79316     | 0.54     | 0.37     | NO  | NO  |                                                                                                       |
|                             | Gene.87237::c16483_g1_i1_VG_Eu_ru_204:g.87237:m.87237    | 0.36     | 0.32     | NO  | NO  |                                                                                                       |
|                             | Gene.98469::c26123_g1_i1_VG_Eu_ru_204:g.98469:m.98469    | 0.61     | 0.55     | NO  | NO  |                                                                                                       |
|                             | Gene.80337::c9481_g1_i1_VG_Eu_ru_204:g.80337:m.80337     | 0.46     | 0.43     | NO  | NO  |                                                                                                       |
|                             | Gene.100718::c28800_g1_i1_VG_Eu_ru_204:g.100718:m.100718 | 0.36     | 0.18     | NO  | NO  |                                                                                                       |
|                             |                                                          |          |          |     |     |                                                                                                       |
| Peptidase M13               | Gene.29383::c6071_g1_i1_VG_Eu_ru_204:g.29383:m.29383     | 639.21   | 370.67   | NO  | NO  |                                                                                                       |
|                             | Gene.36051::c6668_g1_i1_VG_Eu_ru_204:g.36051:m.36051     | 9.59     | 4.86     | YES | NO  |                                                                                                       |
|                             | Gene.49552::c7682_g1_i1_VG_Eu_ru_204:g.49552:m.49552     | 4.33     | 2.26     | NO  | NO  |                                                                                                       |
|                             | Gene.2935::c905_g1_i1_VG_Eu_ru_204:g.2935:m.2935         | 2.49     | 1.29     | NO  | NO  |                                                                                                       |
|                             | Gene.49558::c7682_g1_i2_VG_Eu_ru_204:g.49558:m.49558     | 4.30     | 0.00     | NO  | NO  |                                                                                                       |
|                             | Gene.38883::c6946_g1_i1_VG_Eu_ru_204:g.38883:m.38883     | 1.97     | 0.97     | YES | NO  |                                                                                                       |
|                             | Gene.108990::c37328_g1_i1_VG_Eu_ru_204:g.108990:m.108990 | 1.32     | 0.64     | NO  | YES |                                                                                                       |
|                             | Gene.3150::c959_g1_i1_VG_Eu_ru_204:g.3150:m.3150         | 0.97     | 0.71     | NO  | NO  |                                                                                                       |
|                             | Gene.96173::c24285_g1_i1_VG_Eu_ru_204:g.96173:m.96173    | 0.91     | 0.57     | NO  | NO  |                                                                                                       |
|                             | Gene.2603::c783_g1_i1_VG_Eu_ru_204:g.2603:m.2603         | 0.72     | 0.76     | NO  | NO  |                                                                                                       |
|                             | Gene.88372::c17029_g1_i1_VG_Eu_ru_204:g.88372:m.88372    | 0.47     | 0.24     | NO  | NO  |                                                                                                       |
|                             | Gene.87819::c16751_g1_i1_VG_Eu_ru_204:g.87819:m.87819    | 0.56     | 0.35     | NO  | NO  |                                                                                                       |
|                             | Gene.87689::c16691_g1_i1_VG_Eu_ru_204:g.87689:m.87689    | 0.35     | 0.21     | NO  | NO  |                                                                                                       |
|                             | Gene.105187::c32686_g1_i1_VG_Eu_ru_204:g.105187:m.105187 | 0.32     | 0.23     | NO  | NO  |                                                                                                       |
|                             | Gene.81956::c10469_g1_i1_VG_Eu_ru_204:g.81956:m.81956    | 0.31     | 0.16     | NO  | NO  |                                                                                                       |

|               |                                                         |          |          |     |    |  |
|---------------|---------------------------------------------------------|----------|----------|-----|----|--|
|               | Gene.102833:c30968_g1_i1_VG_Eu_ru_204:g.102833:m.102833 | 0.37     | 0.64     | NO  | NO |  |
|               | Gene.112632:c39626_g1_i1_VG_Eu_ru_204:g.112632:m.112632 | 0.61     | 0.44     | NO  | NO |  |
|               | Gene.91180:c19045_g1_i1_VG_Eu_ru_204:g.91180:m.91180    | 0.29     | 0.28     | NO  | NO |  |
|               | Gene.120319:c46978_g1_i1_VG_Eu_ru_204:g.120319:m.120319 | 0.51     | 0.67     | NO  | NO |  |
|               | Gene.91779:c19672_g1_i1_VG_Eu_ru_204:g.91779:m.91779    | 0.32     | 0.17     | NO  | NO |  |
|               | Gene.94757:c23493_g1_i1_VG_Eu_ru_204:g.94757:m.94757    | 0.34     | 0.78     | YES | NO |  |
|               | Gene.114621:c41775_g1_i1_VG_Eu_ru_204:g.114621:m.114621 | 0.31     | 0.48     | NO  | NO |  |
|               | Gene.95299:c23766_g1_i1_VG_Eu_ru_204:g.95299:m.95299    | 0.36     | 0.85     | NO  | NO |  |
|               | Gene.119241:c46054_g1_i1_VG_Eu_ru_204:g.119241:m.119241 | 0.36     | 0.85     | NO  | NO |  |
|               | Gene.93841:c22248_g1_i1_VG_Eu_ru_204:g.93841:m.93841    | 0.30     | 0.73     | NO  | NO |  |
|               | Gene.98848:c26516_g1_i1_VG_Eu_ru_204:g.98848:m.98848    | 0.29     | 0.22     | YES | NO |  |
|               | Gene.105589:c33079_g1_i1_VG_Eu_ru_204:g.105589:m.105589 | 0.32     | 0.88     | NO  | NO |  |
|               | Gene.85610:c14196_g1_i1_VG_Eu_ru_204:g.85610:m.85610    | 0.35     | 1.02     | NO  | NO |  |
|               | Gene.85960:c14656_g1_i1_VG_Eu_ru_204:g.85960:m.85960    | 0.21     | 0.43     | NO  | NO |  |
|               | Gene.84233:c12466_g1_i1_VG_Eu_ru_204:g.84233:m.84233    | 0.26     | 0.59     | NO  | NO |  |
|               | Gene.92338:c20266_g1_i1_VG_Eu_ru_204:g.92338:m.92338    | 0.30     | 0.90     | NO  | NO |  |
|               | Gene.121950:c48667_g1_i1_VG_Eu_ru_204:g.121950:m.121950 | 0.24     | 0.46     | NO  | NO |  |
|               | Gene.109930:c37706_g1_i1_VG_Eu_ru_204:g.109930:m.109930 | 0.24     | 0.00     | NO  | NO |  |
|               | Gene.110290:c37919_g1_i1_VG_Eu_ru_204:g.110290:m.110290 | 0.21     | 0.59     | NO  | NO |  |
|               | Gene.120563:c47203_g1_i1_VG_Eu_ru_204:g.120563:m.120563 | 0.25     | 1.91     | NO  | NO |  |
|               | Gene.122947:c49936_g1_i1_VG_Eu_ru_204:g.122947:m.122947 | 0.19     | 0.00     | NO  | NO |  |
|               | Gene.92848:c20908_g1_i1_VG_Eu_ru_204:g.92848:m.92848    | 0.19     | 0.95     | NO  | NO |  |
|               | Gene.120512:c47158_g1_i1_VG_Eu_ru_204:g.120512:m.120512 | 0.16     | 1.32     | NO  | NO |  |
| Peptidase M14 | Gene.16298:c4327_g1_i1_VG_Eu_ru_204:g.16298:m.16298     | 14.90    | 7.69     | YES | NO |  |
|               | Gene.62949:c8433_g1_i1_VG_Eu_ru_204:g.62949:m.62949     | 7.59     | 4.31     | NO  | NO |  |
|               | Gene.29528:c6083_g1_i1_VG_Eu_ru_204:g.29528:m.29528     | 4.21     | 2.41     | YES | NO |  |
|               | Gene.4616:c1376_g1_i1_VG_Eu_ru_204:g.4616:m.4616        | 2.43     | 1.48     | YES | NO |  |
|               | Gene.18179:c4601_g1_i1_VG_Eu_ru_204:g.18179:m.18179     | 1.76     | 0.95     | YES | NO |  |
|               | Gene.81090:c9875_g1_i1_VG_Eu_ru_204:g.81090:m.81090     | 0.54     | 0.29     | NO  | NO |  |
|               | Gene.111980:c39040_g1_i1_VG_Eu_ru_204:g.111980:m.111980 | 0.49     | 0.36     | NO  | NO |  |
|               | Gene.99548:c27280_g1_i1_VG_Eu_ru_204:g.99548:m.99548    | 0.40     | 0.19     | NO  | NO |  |
|               | Gene.85633:c14214_g1_i1_VG_Eu_ru_204:g.85633:m.85633    | 0.30     | 0.00     | NO  | NO |  |
|               | Gene.114071:c41151_g1_i1_VG_Eu_ru_204:g.114071:m.114071 | 0.25     | 0.24     | NO  | NO |  |
|               | Gene.94033:c22571_g1_i1_VG_Eu_ru_204:g.94033:m.94033    | 0.22     | 0.71     | NO  | NO |  |
|               | Gene.100219:c28096_g1_i1_VG_Eu_ru_204:g.100219:m.100219 | 0.25     | 0.00     | NO  | NO |  |
|               |                                                         |          |          |     |    |  |
|               |                                                         |          |          |     |    |  |
|               |                                                         |          |          |     |    |  |
|               |                                                         |          |          |     |    |  |
|               |                                                         |          |          |     |    |  |
| Peptidase S10 | Gene.7190:c2146_g1_i1_VG_Eu_ru_204:g.7190:m.7190        | 12.23    | 7.15     | YES | NO |  |
| Peptidase S1  | Gene.108685:c37210_g2_i1_VG_Eu_ru_204:g.108685:m.108685 | 27580.99 | 16772.00 | NO  | NO |  |
|               | Gene.3533:c1049_g1_i2_VG_Eu_ru_204:g.3533:m.3533        | 17647.63 | 7357.31  | NO  | NO |  |
|               | Gene.3527:c1049_g1_i1_VG_Eu_ru_204:g.3527:m.3527        | 18589.80 | 3203.29  | YES | NO |  |
|               | Gene.94691:c23464_g2_i1_VG_Eu_ru_204:g.94691:m.94691    | 13282.56 | 7946.86  | NO  | NO |  |
|               | Gene.116445:c44470_g1_i1_VG_Eu_ru_204:g.116445:m.116445 | 5299.94  | 3315.12  | NO  | NO |  |
|               | Gene.32897:c6401_g1_i1_VG_Eu_ru_204:g.32897:m.32897     | 2284.21  | 1488.10  | YES | NO |  |
|               | Gene.94708:c23473_g1_i1_VG_Eu_ru_204:g.94708:m.94708    | 1263.94  | 752.92   | YES | NO |  |
|               | Gene.28201:c5950_g1_i1_VG_Eu_ru_204:g.28201:m.28201     | 719.69   | 373.18   | YES | NO |  |
|               | Gene.66344:c8591_g1_i1_VG_Eu_ru_204:g.66344:m.66344     | 101.90   | 60.98    | YES | NO |  |
|               | Gene.95279:c23747_g1_i1_VG_Eu_ru_204:g.95279:m.95279    | 109.17   | 67.60    | YES | NO |  |
|               | Gene.48270:c7594_g1_i1_VG_Eu_ru_204:g.48270:m.48270     | 74.85    | 45.16    | NO  | NO |  |
|               | Gene.3713:c1081_g1_i1_VG_Eu_ru_204:g.3713:m.3713        | 63.41    | 36.66    | YES | NO |  |
|               | Gene.44622:c7344_g1_i1_VG_Eu_ru_204:g.44622:m.44622     | 72.51    | 53.63    | NO  | NO |  |
|               | Gene.12417:c3682_g1_i1_VG_Eu_ru_204:g.12417:m.12417     | 39.63    | 23.26    | YES | NO |  |
|               | Gene.6726:c1959_g1_i1_VG_Eu_ru_204:g.6726:m.6726        | 50.65    | 31.79    | YES | NO |  |
|               | Gene.112040:c39094_g1_i1_VG_Eu_ru_204:g.112040:m.112040 | 47.72    | 27.75    | NO  | NO |  |
|               | Gene.1536:c522_g1_i1_VG_Eu_ru_204:g.1536:m.1536         | 38.74    | 23.11    | YES | NO |  |
|               | Gene.94695:c23464_g5_i1_VG_Eu_ru_204:g.94695:m.94695    | 38.99    | 25.64    | YES | NO |  |
|               | Gene.103488:c31358_g1_i1_VG_Eu_ru_204:g.103488:m.103488 | 34.49    | 21.62    | NO  | NO |  |
|               | Gene.64671:c8511_g1_i1_VG_Eu_ru_204:g.64671:m.64671     | 21.84    | 6.98     | NO  | NO |  |
|               | Gene.64677:c8511_g1_i2_VG_Eu_ru_204:g.64677:m.64677     | 20.91    | 6.03     | NO  | NO |  |
|               | Gene.117404:c44932_g1_i1_VG_Eu_ru_204:g.117404:m.117404 | 16.15    | 9.82     | NO  | NO |  |
|               | Gene.33673:c6467_g1_i1_VG_Eu_ru_204:g.33673:m.33673     | 24.19    | 13.80    | YES | NO |  |
|               | Gene.28690:c5995_g1_i1_VG_Eu_ru_204:g.28690:m.28690     | 23.86    | 15.04    | NO  | NO |  |
|               | Gene.14211:c4007_g1_i1_VG_Eu_ru_204:g.14211:m.14211     | 21.94    | 13.17    | YES | NO |  |
|               | Gene.51445:c7798_g1_i3_VG_Eu_ru_204:g.51445:m.51445     | 13.30    | 5.83     | YES | NO |  |
|               | Gene.51430:c7798_g1_i1_VG_Eu_ru_204:g.51430:m.51430     | 13.00    | 1.76     | YES | NO |  |
|               | Gene.47327:c7525_g1_i1_VG_Eu_ru_204:g.47327:m.47327     | 16.24    | 10.51    | YES | NO |  |
|               | Gene.97431:c25195_g1_i1_VG_Eu_ru_204:g.97431:m.97431    | 15.42    | 9.33     | YES | NO |  |
|               | Gene.17551:c4500_g1_i1_VG_Eu_ru_204:g.17551:m.17551     | 18.13    | 10.64    | YES | NO |  |
|               | Gene.102485:c30773_g1_i1_VG_Eu_ru_204:g.102485:m.102485 | 15.48    | 8.21     | NO  | NO |  |
|               | Gene.102234:c30650_g1_i1_VG_Eu_ru_204:g.102234:m.102234 | 15.35    | 8.79     | NO  | NO |  |
|               | Gene.48562:c7612_g1_i1_VG_Eu_ru_204:g.48562:m.48562     | 10.20    | 6.07     | YES | NO |  |
|               | Gene.58657:c8212_g1_i3_VG_Eu_ru_204:g.58657:m.58657     | 9.77     | 4.30     | NO  | NO |  |
|               | Gene.1344:c453_g1_i1_VG_Eu_ru_204:g.1344:m.1344         | 11.02    | 7.78     | YES | NO |  |
|               | Gene.73391:c8859_g1_i1_VG_Eu_ru_204:g.73391:m.73391     | 10.92    | 8.43     | YES | NO |  |
|               | Gene.51438:c7798_g1_i2_VG_Eu_ru_204:g.51438:m.51438     | 11.88    | 0.00     | NO  | NO |  |
|               | Gene.46185:c7467_g1_i1_VG_Eu_ru_204:g.46185:m.46185     | 9.82     | 6.31     | YES | NO |  |
|               | Gene.35896:c6652_g1_i1_VG_Eu_ru_204:g.35896:m.35896     | 6.51     | 3.41     | YES | NO |  |
|               | Gene.907:c285_g1_i1_VG_Eu_ru_204:g.907:m.907            | 8.72     | 5.66     | YES | NO |  |
|               | Gene.3941:c1136_g1_i1_VG_Eu_ru_204:g.3941:m.3941        | 8.50     | 5.04     | YES | NO |  |
|               | Gene.12247:c3643_g1_i1_VG_Eu_ru_204:g.12247:m.12247     | 7.27     | 4.05     | YES | NO |  |
|               | Gene.103441:c31324_g1_i1_VG_Eu_ru_204:g.103441:m.103441 | 7.67     | 5.16     | NO  | NO |  |
|               | Gene.6510:c1904_g1_i1_VG_Eu_ru_204:g.6510:m.6510        | 9.67     | 5.69     | YES | NO |  |
|               | Gene.51355:c7793_g2_i1_VG_Eu_ru_204:g.51355:m.51355     | 6.81     | 3.97     | YES | NO |  |
|               | Gene.58652:c8212_g1_i1_VG_Eu_ru_204:g.58652:m.58652     | 8.24     | 1.59     | NO  | NO |  |
|               | Gene.49862:c7700_g1_i1_VG_Eu_ru_204:g.49862:m.49862     | 6.52     | 4.33     | YES | NO |  |
|               | Gene.17400:c4475_g1_i1_VG_Eu_ru_204:g.17400:m.17400     | 4.16     | 2.50     | YES | NO |  |
|               | Gene.20016:c4911_g1_i1_VG_Eu_ru_204:g.20016:m.20016     | 5.43     | 3.42     | NO  | NO |  |
|               | Gene.14840:c4103_g1_i2_VG_Eu_ru_204:g.14840:m.14840     | 5.29     | 3.55     | YES | NO |  |
|               | Gene.52576:c7883_g1_i2_VG_Eu_ru_204:g.52576:m.52576     | 4.61     | 2.88     | YES | NO |  |
|               | Gene.58653:c8212_g1_i1_VG_Eu_ru_204:g.58653:m.58653     | 8.45     | 0.96     | NO  | NO |  |
|               | Gene.10283:c3071_g1_i1_VG_Eu_ru_204:g.10283:m.10283     | 4.48     | 2.22     | YES | NO |  |
|               | Gene.118633:c45639_g1_i1_VG_Eu_ru_204:g.118633:m.118633 | 2.42     | 1.39     | NO  | NO |  |
|               | Gene.52574:c7883_g1_i1_VG_Eu_ru_204:g.52574:m.52574     | 3.48     | 2.19     | YES | NO |  |
|               | Gene.47849:c7566_g1_i1_VG_Eu_ru_204:g.47849:m.47849     | 3.71     | 1.35     | NO  | NO |  |
|               | Gene.47856:c7566_g1_i2_VG_Eu_ru_204:g.47856:m.47856     | 3.71     | 1.35     | NO  | NO |  |
|               | Gene.108756:c37236_g1_i1_VG_Eu_ru_204:g.108756:m.108756 | 1.13     | 0.57     | NO  | NO |  |
|               | Gene.18064:c4584_g1_i1_VG_Eu_ru_204:g.18064:m.18064     | 1.52     | 0.67     | YES | NO |  |
|               | Gene.97988:c25688_g1_i1_VG_Eu_ru_204:g.97988:m.97988    | 3.39     | 2.20     | YES | NO |  |
|               | Gene.3898:c1126_g1_i1_VG_Eu_ru_204:g.3898:m.3898        | 2.65     | 1.46     | YES | NO |  |
|               | Gene.43795:c7293_g1_i1_VG_Eu_ru_204:g.43795:m.43795     | 2.84     | 1.71     | YES | NO |  |
|               | Gene.55647:c8044_g1_i1_VG_Eu_ru_204:g.55647:m.55647     | 2.16     | 1.33     | YES | NO |  |
|               | Gene.90400:c18414_g1_i1_VG_Eu_ru_204:g.90400:m.90400    | 1.59     | 0.89     | NO  | NO |  |
|               | Gene.87056:c16423_g1_i1_VG_Eu_ru_204:g.87056:m.87056    | 1.63     | 1.12     | NO  | NO |  |
|               | Gene.1768:c607_g1_i1_VG_Eu_ru_204:g.1768:m.1768         | 1.64     | 0.98     | YES | NO |  |
|               | Gene.13593:c3896_g1_i1_VG_Eu_ru_204:g.13593:m.13593     | 1.73     | 1.56     | YES | NO |  |
|               | Gene.10989:c3276_g1_i1_VG_Eu_ru_204:g.10989:m.10989     | 1.69     | 0.84     | YES | NO |  |
|               | Gene.10894:c3243_g1_i1_VG_Eu_ru_204:g.10894:m.10894     | 1.07     | 0.50     | YES | NO |  |
|               | Gene.4004:c1152_g1_i1_VG_Eu_ru_204:g.4004:m.4004        | 1.80     | 1.08     | YES | NO |  |
|               | Gene.96884:c24774_g1_i1_VG_Eu_ru_204:g.96884:m.96884    | 1.66     | 0.78     | YES | NO |  |
|               | Gene.15060:c4147_g1_i1_VG_Eu_ru_204:g.15060:m.15060     | 0.74     | 0.39     | NO  | NO |  |
|               | Gene.43816:c7297_g1_i1_VG_Eu_ru_204:g.43816:m.43816     | 1.17     | 0.60     | YES | NO |  |
|               | Gene.1394:c478_g1_i1_VG_Eu_ru_204:g.1394:m.1394         | 0.99     | 0.58     | YES | NO |  |
|               | Gene.94601:c23431_g1_i1_VG_Eu_ru_204:g.94601:m.94601    | 1.04     | 0.55     | YES | NO |  |
|               | Gene.82355:c10772_g1_i1_VG_Eu_ru_204:g.82355:m.82355    | 1.99     | 1.96     | NO  | NO |  |
|               | Gene.11436:c3441_g1_i2_VG_Eu_ru_204:g.11436:m.11436     | 1.24     | 0.53     | NO  | NO |  |
|               | Gene.2303:c724_g1_i2_VG_Eu_ru_204:g.2303:m.2303         | 0.98     | 0.52     | NO  | NO |  |
|               | Gene.9674:c2893_g1_i1_VG_Eu_ru_204:g.9674:m.9674        | 0.62     | 0.35     | YES | NO |  |
|               | Gene.11434:c3441_g1_i1_VG_Eu_ru_204:g.11434:m.11434     | 1.18     | 0.30     | NO  | NO |  |
|               | Gene.89826:c17948_g1_i1_VG_Eu_ru_204:g.89826:m.89826    | 0.68     | 0.50     | YES | NO |  |
|               | Gene.14833:c4101_g1_i1_VG_Eu_ru_204:g.14833:m.14833     | 1.33     | 1.29     | NO  | NO |  |
|               | Gene.14962:c4123_g1_i1_VG_Eu_ru_204:g.14962:m.14962     | 1.04     | 0.65     | NO  | NO |  |
|               | Gene.117139:c44822_g1_i1_VG_Eu_ru_204:g.117139:m.117139 | 0.79     | 0.36     | NO  | NO |  |
|               | Gene.35815:c6645_g2_i1_VG_Eu_ru_204:g.35815:m.35815     | 0.78     | 0.19     | NO  | NO |  |
|               | Gene.82211:c10654_g1_i1_VG_Eu_ru_204:g.82211:m.82211    | 0.84     | 0.56     | NO  | NO |  |
|               | Gene.7337:c2196_g1_i1_VG_Eu_ru_204:g.7337:m.7337        | 0.69     | 0.47     | NO  | NO |  |

excluded

|                  |                                                         |          |          |     |    |          |  |
|------------------|---------------------------------------------------------|----------|----------|-----|----|----------|--|
|                  | Gene.145:c57_g1_i1_VG_Eu_ru_204:g.145:m.145             | 1.02     | 0.89     | NO  | NO |          |  |
|                  | Gene.2299:c724_g1_i1_VG_Eu_ru_204:g.2299:m.2299         | 1.04     | 0.00     | NO  | NO |          |  |
|                  | Gene.117462:c44953_g1_i1_VG_Eu_ru_204:g.117462:m.117462 | 0.66     | 0.51     | NO  | NO |          |  |
|                  | Gene.3147:c957_g1_i1_VG_Eu_ru_204:g.3147:m.3147         | 0.58     | 0.47     | YES | NO |          |  |
|                  | Gene.35821:c6645_g4_i1_VG_Eu_ru_204:g.35821:m.35821     | 0.46     | 0.34     | NO  | NO |          |  |
|                  | Gene.95685:c23992_g1_i1_VG_Eu_ru_204:g.95685:m.95685    | 0.85     | 0.72     | NO  | NO |          |  |
|                  | Gene.81289:c10000_g1_i1_VG_Eu_ru_204:g.81289:m.81289    | 0.65     | 0.62     | NO  | NO |          |  |
|                  | Gene.73394:c8859_g1_i2_VG_Eu_ru_204:g.73394:m.73394     | 1.49     | 2.12     | NO  | NO |          |  |
|                  | Gene.4766:c1421_g1_i1_VG_Eu_ru_204:g.4766:m.4766        | 0.55     | 0.36     | NO  | NO |          |  |
|                  | Gene.95761:c24039_g1_i1_VG_Eu_ru_204:g.95761:m.95761    | 0.38     | 0.14     | NO  | NO |          |  |
|                  | Gene.116799:c44628_g1_i1_VG_Eu_ru_204:g.116799:m.116799 | 0.90     | 0.86     | NO  | NO |          |  |
|                  | Gene.121265:c47878_g1_i1_VG_Eu_ru_204:g.121265:m.121265 | 0.73     | 0.70     | NO  | NO |          |  |
|                  | Gene.97637:c25385_g1_i1_VG_Eu_ru_204:g.97637:m.97637    | 0.47     | 0.30     | NO  | NO |          |  |
|                  | Gene.4918:c1501_g1_i2_VG_Eu_ru_204:g.4918:m.4918        | 0.56     | 0.55     | NO  | NO |          |  |
|                  | Gene.106239:c33759_g1_i1_VG_Eu_ru_204:g.106239:m.106239 | 0.48     | 0.17     | NO  | NO |          |  |
|                  | Gene.119970:c46654_g1_i1_VG_Eu_ru_204:g.119970:m.119970 | 0.59     | 0.24     | NO  | NO |          |  |
|                  | Gene.7323:c2189_g1_i1_VG_Eu_ru_204:g.7323:m.7323        | 1.39     | 3.78     | NO  | NO |          |  |
|                  | Gene.120396:c47046_g1_i1_VG_Eu_ru_204:g.120396:m.120396 | 0.66     | 0.74     | NO  | NO |          |  |
|                  | Gene.120642:c47275_g1_i1_VG_Eu_ru_204:g.120642:m.120642 | 0.32     | 0.17     | NO  | NO |          |  |
|                  | Gene.97650:c25399_g1_i1_VG_Eu_ru_204:g.97650:m.97650    | 0.80     | 0.68     | NO  | NO |          |  |
|                  | Gene.102550:c38085_g1_i1_VG_Eu_ru_204:g.102550:m.102550 | 0.79     | 0.66     | NO  | NO |          |  |
|                  | Gene.119120:c45971_g1_i1_VG_Eu_ru_204:g.119120:m.119120 | 0.37     | 0.36     | NO  | NO |          |  |
|                  | Gene.119508:c46281_g1_i1_VG_Eu_ru_204:g.119508:m.119508 | 0.45     | 0.38     | NO  | NO |          |  |
|                  | Gene.90955:c18847_g1_i1_VG_Eu_ru_204:g.90955:m.90955    | 0.58     | 0.63     | NO  | NO |          |  |
|                  | Gene.110118:c37831_g1_i1_VG_Eu_ru_204:g.110118:m.110118 | 0.42     | 0.36     | NO  | NO |          |  |
|                  | Gene.80835:c9730_g1_i1_VG_Eu_ru_204:g.80835:m.80835     | 0.59     | 0.70     | YES | NO |          |  |
|                  | Gene.4906:c1491_g1_i1_VG_Eu_ru_204:g.4906:m.4906        | 0.43     | 0.34     | NO  | NO |          |  |
|                  | Gene.97893:c25621_g1_i1_VG_Eu_ru_204:g.97893:m.97893    | 0.39     | 0.14     | NO  | NO |          |  |
|                  | Gene.106149:c33652_g1_i1_VG_Eu_ru_204:g.106149:m.106149 | 0.37     | 0.39     | NO  | NO |          |  |
|                  | Gene.112466:c39454_g1_i1_VG_Eu_ru_204:g.112466:m.112466 | 0.38     | 0.30     | NO  | NO |          |  |
|                  | Gene.118149:c45319_g1_i1_VG_Eu_ru_204:g.118149:m.118149 | 0.38     | 0.53     | NO  | NO |          |  |
|                  | Gene.83346:c11587_g1_i1_VG_Eu_ru_204:g.83346:m.83346    | 0.51     | 0.74     | NO  | NO |          |  |
|                  | Gene.89857:c17967_g1_i1_VG_Eu_ru_204:g.89857:m.89857    | 0.30     | 0.31     | NO  | NO |          |  |
|                  | Gene.88075:c16885_g1_i1_VG_Eu_ru_204:g.88075:m.88075    | 0.32     | 0.24     | YES | NO |          |  |
|                  | Gene.92612:c20616_g1_i1_VG_Eu_ru_204:g.92612:m.92612    | 0.27     | 0.17     | NO  | NO |          |  |
|                  | Gene.105420:c32922_g1_i1_VG_Eu_ru_204:g.105420:m.105420 | 0.40     | 0.46     | NO  | NO |          |  |
|                  | Gene.115371:c42909_g1_i1_VG_Eu_ru_204:g.115371:m.115371 | 0.51     | 0.78     | NO  | NO |          |  |
|                  | Gene.90498:c18481_g1_i1_VG_Eu_ru_204:g.90498:m.90498    | 0.39     | 0.63     | NO  | NO |          |  |
|                  | Gene.98314:c25968_g1_i1_VG_Eu_ru_204:g.98314:m.98314    | 0.38     | 0.35     | NO  | NO |          |  |
|                  | Gene.99154:c26826_g1_i1_VG_Eu_ru_204:g.99154:m.99154    | 0.39     | 0.50     | NO  | NO |          |  |
|                  | Gene.79262:c9007_g1_i1_VG_Eu_ru_204:g.79262:m.79262     | 0.32     | 0.26     | NO  | NO |          |  |
|                  | Gene.79951:c9290_g1_i1_VG_Eu_ru_204:g.79951:m.79951     | 0.28     | 0.20     | NO  | NO |          |  |
|                  | Gene.98580:c26233_g1_i1_VG_Eu_ru_204:g.98580:m.98580    | 0.26     | 0.28     | NO  | NO |          |  |
|                  | Gene.99752:c27498_g1_i1_VG_Eu_ru_204:g.99752:m.99752    | 0.39     | 1.01     | NO  | NO |          |  |
|                  | Gene.100661:c28715_g1_i1_VG_Eu_ru_204:g.100661:m.100661 | 0.44     | 1.33     | NO  | NO |          |  |
|                  | Gene.113587:c40598_g1_i1_VG_Eu_ru_204:g.113587:m.113587 | 0.29     | 0.17     | NO  | NO |          |  |
|                  | Gene.90273:c18318_g1_i1_VG_Eu_ru_204:g.90273:m.90273    | 0.33     | 0.63     | YES | NO |          |  |
|                  | Gene.98592:c26240_g1_i1_VG_Eu_ru_204:g.98592:m.98592    | 0.39     | 0.17     | NO  | NO |          |  |
|                  | Gene.108846:c37266_g1_i1_VG_Eu_ru_204:g.108846:m.108846 | 0.26     | 0.23     | NO  | NO |          |  |
|                  | Gene.83811:c12031_g1_i1_VG_Eu_ru_204:g.83811:m.83811    | 0.38     | 0.83     | NO  | NO |          |  |
|                  | Gene.93713:c22047_g1_i1_VG_Eu_ru_204:g.93713:m.93713    | 0.36     | 0.37     | NO  | NO |          |  |
|                  | Gene.93820:c22204_g1_i1_VG_Eu_ru_204:g.93820:m.93820    | 0.29     | 0.35     | NO  | NO |          |  |
|                  | Gene.115224:c42673_g1_i1_VG_Eu_ru_204:g.115224:m.115224 | 0.30     | 0.24     | NO  | NO |          |  |
|                  | Gene.122052:c48780_g1_i1_VG_Eu_ru_204:g.122052:m.122052 | 0.36     | 0.87     | NO  | NO |          |  |
|                  | Gene.100064:c27883_g1_i1_VG_Eu_ru_204:g.100064:m.100064 | 0.34     | 0.39     | NO  | NO |          |  |
|                  | Gene.104965:c32493_g1_i1_VG_Eu_ru_204:g.104965:m.104965 | 0.44     | 1.14     | NO  | NO |          |  |
|                  | Gene.106248:c33768_g1_i1_VG_Eu_ru_204:g.106248:m.106248 | 0.48     | 0.97     | NO  | NO |          |  |
|                  | Gene.4917:c1501_g1_i1_VG_Eu_ru_204:g.4917:m.4917        | 0.31     | 0.00     | NO  | NO |          |  |
|                  | Gene.12065:c3602_g1_i1_VG_Eu_ru_204:g.12065:m.12065     | 0.46     | 0.00     | NO  | NO |          |  |
|                  | Gene.111517:c38723_g1_i1_VG_Eu_ru_204:g.111517:m.111517 | 0.32     | 0.32     | NO  | NO |          |  |
|                  | Gene.81702:c10281_g1_i1_VG_Eu_ru_204:g.81702:m.81702    | 0.23     | 0.00     | NO  | NO |          |  |
|                  | Gene.84415:c12712_g1_i1_VG_Eu_ru_204:g.84415:m.84415    | 0.25     | 0.00     | NO  | NO |          |  |
|                  | Gene.92196:c20095_g1_i1_VG_Eu_ru_204:g.92196:m.92196    | 0.34     | 0.35     | NO  | NO |          |  |
|                  | Gene.93027:c21130_g1_i1_VG_Eu_ru_204:g.93027:m.93027    | 0.24     | 0.30     | NO  | NO |          |  |
|                  | Gene.115276:c42765_g1_i1_VG_Eu_ru_204:g.115276:m.115276 | 0.29     | 0.46     | NO  | NO |          |  |
|                  | Gene.89771:c17902_g1_i1_VG_Eu_ru_204:g.89771:m.89771    | 0.32     | 0.40     | NO  | NO |          |  |
|                  | Gene.91170:c19038_g1_i1_VG_Eu_ru_204:g.91170:m.91170    | 0.32     | 0.00     | NO  | NO |          |  |
|                  | Gene.100118:c27964_g1_i1_VG_Eu_ru_204:g.100118:m.100118 | 0.27     | 0.52     | NO  | NO |          |  |
|                  | Gene.103867:c31621_g1_i1_VG_Eu_ru_204:g.103867:m.103867 | 0.28     | 0.59     | NO  | NO |          |  |
|                  | Gene.104508:c32119_g1_i1_VG_Eu_ru_204:g.104508:m.104508 | 0.26     | 0.24     | NO  | NO |          |  |
|                  | Gene.107848:c35700_g1_i1_VG_Eu_ru_204:g.107848:m.107848 | 0.20     | 0.13     | NO  | NO |          |  |
|                  | Gene.108303:c36479_g1_i1_VG_Eu_ru_204:g.108303:m.108303 | 0.29     | 0.32     | NO  | NO |          |  |
|                  | Gene.113063:c40049_g1_i1_VG_Eu_ru_204:g.113063:m.113063 | 0.27     | 0.27     | NO  | NO |          |  |
|                  | Gene.113083:c40092_g1_i1_VG_Eu_ru_204:g.113083:m.113083 | 0.30     | 0.70     | NO  | NO |          |  |
|                  | Gene.121517:c48164_g1_i1_VG_Eu_ru_204:g.121517:m.121517 | 0.35     | 0.51     | NO  | NO |          |  |
|                  | Gene.122264:c49045_g1_i1_VG_Eu_ru_204:g.122264:m.122264 | 0.37     | 1.19     | NO  | NO |          |  |
|                  | Gene.122714:c49647_g1_i1_VG_Eu_ru_204:g.122714:m.122714 | 0.25     | 0.21     | NO  | NO |          |  |
|                  | Gene.86260:c15144_g1_i1_VG_Eu_ru_204:g.86260:m.86260    | 0.17     | 0.25     | NO  | NO |          |  |
|                  | Gene.105349:c32844_g1_i1_VG_Eu_ru_204:g.105349:m.105349 | 0.26     | 1.09     | NO  | NO |          |  |
|                  | Gene.113079:c40080_g1_i1_VG_Eu_ru_204:g.113079:m.113079 | 0.21     | 0.20     | NO  | NO |          |  |
|                  | Gene.85964:c14669_g1_i1_VG_Eu_ru_204:g.85964:m.85964    | 0.23     | 0.44     | NO  | NO |          |  |
|                  | Gene.92483:c20456_g1_i1_VG_Eu_ru_204:g.92483:m.92483    | 0.25     | 1.62     | NO  | NO |          |  |
|                  | Gene.97936:c25646_g1_i1_VG_Eu_ru_204:g.97936:m.97936    | 0.28     | 1.50     | NO  | NO |          |  |
|                  | Gene.106440:c33973_g1_i1_VG_Eu_ru_204:g.106440:m.106440 | 0.29     | 0.79     | NO  | NO |          |  |
|                  | Gene.115020:c42353_g1_i1_VG_Eu_ru_204:g.115020:m.115020 | 0.20     | 0.31     | NO  | NO |          |  |
|                  | Gene.80798:c9709_g1_i1_VG_Eu_ru_204:g.80798:m.80798     | 0.25     | 0.51     | NO  | NO |          |  |
|                  | Gene.85064:c13513_g1_i1_VG_Eu_ru_204:g.85064:m.85064    | 0.20     | 0.00     | NO  | NO |          |  |
|                  | Gene.85836:c14473_g1_i1_VG_Eu_ru_204:g.85836:m.85836    | 0.22     | 0.00     | NO  | NO |          |  |
|                  | Gene.86097:c14848_g1_i1_VG_Eu_ru_204:g.86097:m.86097    | 0.18     | 0.79     | NO  | NO |          |  |
|                  | Gene.88059:c16878_g1_i1_VG_Eu_ru_204:g.88059:m.88059    | 0.18     | 0.38     | NO  | NO |          |  |
|                  | Gene.102148:c30598_g1_i1_VG_Eu_ru_204:g.102148:m.102148 | 0.20     | 0.00     | NO  | NO |          |  |
|                  | Gene.107798:c35638_g1_i1_VG_Eu_ru_204:g.107798:m.107798 | 0.25     | 0.95     | NO  | NO |          |  |
|                  | Gene.113118:c40129_g1_i1_VG_Eu_ru_204:g.113118:m.113118 | 0.26     | 2.03     | NO  | NO |          |  |
|                  | Gene.115964:c43820_g1_i1_VG_Eu_ru_204:g.115964:m.115964 | 0.24     | 0.00     | NO  | NO |          |  |
|                  | Gene.116186:c44277_g1_i1_VG_Eu_ru_204:g.116186:m.116186 | 0.27     | 2.29     | NO  | NO |          |  |
|                  | Gene.116858:c44665_g1_i1_VG_Eu_ru_204:g.116858:m.116858 | 0.19     | 0.44     | NO  | NO |          |  |
|                  | Gene.121410:c48038_g1_i1_VG_Eu_ru_204:g.121410:m.121410 | 0.21     | 0.63     | NO  | NO |          |  |
|                  | Gene.121782:c48493_g1_i1_VG_Eu_ru_204:g.121782:m.121782 | 0.20     | 0.00     | NO  | NO |          |  |
|                  | Gene.93440:c21650_g1_i1_VG_Eu_ru_204:g.93440:m.93440    | 0.15     | 1.70     | NO  | NO |          |  |
|                  | Gene.97210:c25004_g1_i1_VG_Eu_ru_204:g.97210:m.97210    | 0.18     | 0.00     | NO  | NO |          |  |
|                  | Gene.113377:c40386_g1_i1_VG_Eu_ru_204:g.113377:m.113377 | 0.20     | 2.29     | NO  | NO |          |  |
|                  | Gene.114168:c41277_g1_i1_VG_Eu_ru_204:g.114168:m.114168 | 0.17     | 2.25     | NO  | NO |          |  |
|                  | Gene.115061:c42420_g1_i1_VG_Eu_ru_204:g.115061:m.115061 | 0.16     | 1.19     | NO  | NO |          |  |
|                  | Gene.87674:c16683_g1_i1_VG_Eu_ru_204:g.87674:m.87674    | 0.12     | 0.90     | NO  | NO |          |  |
|                  | Gene.94707:c23471_g1_i1_VG_Eu_ru_204:g.94707:m.94707    | 0.13     | 0.00     | NO  | NO |          |  |
|                  | Gene.35819:c6645_g2_i2_VG_Eu_ru_204:g.35819:m.35819     | 0.00     | 0.00     | NO  | NO |          |  |
| Phospholipase A2 | Gene.4975:c1525_g1_i1_VG_Eu_ru_204:g.4975:m.4975        | 924.34   | 606.83   | YES | NO |          |  |
|                  | Gene.22840:c5296_g1_i3_VG_Eu_ru_204:g.22840:m.22840     | 31.24    | 12.60    | NO  | NO |          |  |
|                  | Gene.22838:c5296_g1_i2_VG_Eu_ru_204:g.22838:m.22838     | 36.72    | 15.71    | NO  | NO |          |  |
|                  | Gene.45279:c7390_g1_i1_VG_Eu_ru_204:g.45279:m.45279     | 4.10     | 2.38     | YES | NO |          |  |
|                  | Gene.16727:c4387_g1_i1_VG_Eu_ru_204:g.16727:m.16727     | 4.87     | 1.58     | NO  | NO |          |  |
|                  | Gene.16731:c4387_g1_i2_VG_Eu_ru_204:g.16731:m.16731     | 4.87     | 1.58     | NO  | NO |          |  |
|                  | Gene.31394:c6262_g1_i1_VG_Eu_ru_204:g.31394:m.31394     | 4.21     | 2.58     | NO  | NO |          |  |
|                  | Gene.82786:c11093_g1_i1_VG_Eu_ru_204:g.82786:m.82786    | 0.26     | 0.00     | NO  | NO |          |  |
| Pimplin          | Gene.59797:c8273_g2_i1_VG_Eu_ru_204:g.59797:m.59797     | 17670.95 | 13270.00 | NO  | NO | excluded |  |
|                  | Gene.59801:c8273_g2_i2_VG_Eu_ru_204:g.59801:m.59801     | 16121.13 | 8559.65  | NO  | NO | excluded |  |
|                  | Gene.15272:c4180_g1_i1_VG_Eu_ru_204:g.15272:m.15272     | 1.60     | 0.52     | NO  | NO | excluded |  |
|                  | Gene.15289:c4180_g1_i3_VG_Eu_ru_204:g.15289:m.15289     | 1.60     | 0.52     | NO  | NO | excluded |  |
|                  | Gene.4686:c1390_g1_i1_VG_Eu_ru_204:g.4686:m.4686        | 0.29     | 0.22     | NO  | NO |          |  |
| Serpin           | Gene.17422:c4479_g2_i1_VG_Eu_ru_204:g.17422:m.17422     | 9620.39  | 5305.42  | YES | NO |          |  |
|                  | Gene.62059:c8395_g1_i2_VG_Eu_ru_204:g.62059:m.62059     | 165.54   | 85.83    | YES | NO |          |  |
|                  | Gene.44484:c7332_g1_i1_VG_Eu_ru_204:g.44484:m.44484     | 87.61    | 33.91    | YES | NO |          |  |
|                  | Gene.44486:c7332_g1_i2_VG_Eu_ru_204:g.44486:m.44486     | 87.16    | 16.35    | YES | NO |          |  |

|                             |                                                           |         |         |     |     |                   |
|-----------------------------|-----------------------------------------------------------|---------|---------|-----|-----|-------------------|
|                             | Gene.62065::c8395_g1_i3_VG_Eu_ru_204::g.62065:m.62065     | 75.13   | 10.86   | NO  | NO  |                   |
|                             | Gene.17425::c4479_g3_i1_VG_Eu_ru_204::g.17425:m.17425     | 72.52   | 51.85   | NO  | NO  |                   |
|                             | Gene.109053::c37347_g1_i1_VG_Eu_ru_204::g.109053:m.109053 | 30.36   | 16.49   | NO  | NO  |                   |
|                             | Gene.62056::c8395_g1_i1_VG_Eu_ru_204::g.62056:m.62056     | 28.55   | 14.21   | NO  | NO  |                   |
|                             | Gene.82466::c10855_g1_i1_VG_Eu_ru_204::g.82466:m.82466    | 13.02   | 7.66    | YES | NO  |                   |
|                             | Gene.12721::c3734_g1_i1_VG_Eu_ru_204::g.12721:m.12721     | 12.45   | 7.10    | YES | NO  |                   |
|                             | Gene.82659::c11006_g1_i1_VG_Eu_ru_204::g.82659:m.82659    | 9.47    | 5.06    | YES | NO  |                   |
|                             | Gene.54137::c7959_g1_i1_VG_Eu_ru_204::g.54137:m.54137     | 5.92    | 1.44    | YES | NO  |                   |
|                             | Gene.54143::c7959_g1_i2_VG_Eu_ru_204::g.54143:m.54143     | 5.92    | 1.44    | YES | NO  |                   |
|                             | Gene.51961::c7834_g1_i1_VG_Eu_ru_204::g.51961:m.51961     | 2.89    | 0.78    | YES | NO  |                   |
|                             | Gene.51972::c7834_g1_i3_VG_Eu_ru_204::g.51972:m.51972     | 2.89    | 0.78    | YES | NO  |                   |
|                             | Gene.14956::c4122_g1_i1_VG_Eu_ru_204::g.14956:m.14956     | 3.79    | 2.23    | YES | NO  |                   |
|                             | Gene.51966::c7834_g1_i2_VG_Eu_ru_204::g.51966:m.51966     | 2.60    | 0.00    | YES | NO  |                   |
|                             | Gene.35548::c6620_g1_i1_VG_Eu_ru_204::g.35548:m.35548     | 13.52   | 83.52   | NO  | NO  |                   |
|                             | Gene.51967::c7834_g1_i2_VG_Eu_ru_204::g.51967:m.51967     | 2.92    | 0.03    | NO  | NO  |                   |
|                             | Gene.11367::c3418_g2_i1_VG_Eu_ru_204::g.11367:m.11367     | 3.17    | 2.77    | NO  | NO  |                   |
|                             | Gene.11362::c3418_g1_i1_VG_Eu_ru_204::g.11362:m.11362     | 3.17    | 1.96    | NO  | NO  |                   |
|                             | Gene.119789::c46500_g1_i1_VG_Eu_ru_204::g.119789:m.119789 | 7.90    | 17.23   | NO  | NO  |                   |
|                             | Gene.81245::c9973_g1_i1_VG_Eu_ru_204::g.81245:m.81245     | 0.92    | 0.53    | NO  | NO  |                   |
|                             | Gene.6934::c2033_g1_i1_VG_Eu_ru_204::g.6934:m.6934        | 0.60    | 0.23    | NO  | NO  |                   |
|                             | Gene.98401::c26057_g1_i1_VG_Eu_ru_204::g.98401:m.98401    | 2.66    | 4.82    | NO  | NO  |                   |
|                             | Gene.111600::c38764_g1_i1_VG_Eu_ru_204::g.111600:m.111600 | 0.61    | 0.54    | NO  | NO  |                   |
|                             | Gene.108702::c37214_g1_i1_VG_Eu_ru_204::g.108702:m.108702 | 0.49    | 0.30    | NO  | NO  |                   |
|                             | Gene.109935::c37708_g1_i1_VG_Eu_ru_204::g.109935:m.109935 | 1.71    | 6.30    | NO  | NO  |                   |
|                             | Gene.12838::c3751_g1_i1_VG_Eu_ru_204::g.12838:m.12838     | 1.23    | 7.36    | NO  | NO  |                   |
|                             | Gene.7857::c2369_g1_i1_VG_Eu_ru_204::g.7857:m.7857        | 1.20    | 8.32    | NO  | NO  |                   |
|                             | Gene.13774::c3940_g1_i1_VG_Eu_ru_204::g.13774:m.13774     | 1.25    | 9.93    | NO  | NO  |                   |
|                             | Gene.117269::c44879_g1_i1_VG_Eu_ru_204::g.117269:m.117269 | 0.40    | 0.10    | NO  | NO  |                   |
|                             | Gene.105075::c32584_g1_i1_VG_Eu_ru_204::g.105075:m.105075 | 0.38    | 1.02    | NO  | NO  |                   |
|                             | Gene.5258::c1627_g1_i1_VG_Eu_ru_204::g.5258:m.5258        | 0.60    | 2.65    | NO  | NO  |                   |
|                             | Gene.85457::c14004_g1_i1_VG_Eu_ru_204::g.85457:m.85457    | 0.40    | 1.53    | NO  | NO  |                   |
|                             | Gene.96615::c24587_g1_i1_VG_Eu_ru_204::g.96615:m.96615    | 0.25    | 0.00    | NO  | NO  |                   |
|                             | Gene.101193::c29545_g1_i1_VG_Eu_ru_204::g.101193:m.101193 | 0.25    | 1.53    | NO  | NO  |                   |
|                             | Gene.112639::c39631_g1_i1_VG_Eu_ru_204::g.112639:m.112639 | 0.16    | 0.31    | NO  | NO  |                   |
|                             | Gene.114211::c41331_g1_i1_VG_Eu_ru_204::g.114211:m.114211 | 0.23    | 0.79    | NO  | NO  |                   |
| Sphingomyelinase            | Gene.28959::c6029_g1_i1_VG_Eu_ru_204::g.28959:m.28959     | 2.03    | 1.18    | YES | NO  |                   |
|                             | Gene.28975::c6029_g1_i2_VG_Eu_ru_204::g.28975:m.28975     | 2.02    | 0.00    | YES | NO  |                   |
|                             | Gene.14951::c4121_g1_i2_VG_Eu_ru_204::g.14951:m.14951     | 2.97    | 1.69    | YES | NO  |                   |
|                             | Gene.14947::c4121_g1_i1_VG_Eu_ru_204::g.14947:m.14947     | 2.34    | 0.00    | YES | NO  |                   |
|                             | Gene.119599::c46351_g1_i1_VG_Eu_ru_204::g.119599:m.119599 | 0.75    | 0.52    | NO  | NO  |                   |
|                             | Gene.80852::c9741_g1_i1_VG_Eu_ru_204::g.80852:m.80852     | 0.86    | 0.38    | NO  | NO  |                   |
| SVWC-domain 1 (Asilidin8)   | Gene.4808::c1438_g1_i1_VG_Eu_ru_204::g.4808:m.4808        | 1443.99 | 1093.16 | NO  | YES | U-Asilidin8-Eru1a |
|                             | Gene.3809::c1109_g1_i2_VG_Eu_ru_204::g.3809:m.3809        | 3.85    | 4.20    | YES | NO  |                   |
|                             | Gene.99960::c27749_g1_i1_VG_Eu_ru_204::g.99960:m.99960    | 3.62    | 4.28    | YES | NO  |                   |
| SVWC-domain 2 (Asilidin9)   | Gene.34546::c6542_g1_i1_VG_Eu_ru_204::g.34546:m.34546     | 781.60  | 529.17  | NO  | YES | U-Asilidin9-Eru1a |
|                             | Gene.34549::c6542_g1_i2_VG_Eu_ru_204::g.34549:m.34549     | 532.03  | 106.81  | YES | NO  |                   |
|                             | Gene.103013::c31070_g1_i1_VG_Eu_ru_204::g.103013:m.103013 | 1.40    | 1.23    | NO  | NO  |                   |
| Venom acid phosphatase-like | Gene.61465::c8353_g2_i1_VG_Eu_ru_204::g.61465:m.61465     | 2379.59 | 1386.51 | YES | NO  |                   |
|                             | Gene.61466::c8353_g2_i1_VG_Eu_ru_204::g.61466:m.61466     | 59.30   | 45.27   | NO  | NO  |                   |
|                             | Gene.15759::c4249_g1_i1_VG_Eu_ru_204::g.15759:m.15759     | 9.95    | 5.32    | NO  | NO  |                   |
|                             | Gene.61467::c8353_g2_i1_VG_Eu_ru_204::g.61467:m.61467     | 21.32   | 17.96   | NO  | NO  |                   |
|                             | Gene.109467::c37501_g1_i1_VG_Eu_ru_204::g.109467:m.109467 | 6.23    | 3.67    | NO  | NO  |                   |
|                             | Gene.58545::c8208_g1_i2_VG_Eu_ru_204::g.58545:m.58545     | 4.64    | 2.48    | NO  | NO  |                   |
|                             | Gene.58536::c8208_g1_i1_VG_Eu_ru_204::g.58536:m.58536     | 4.05    | 0.08    | NO  | NO  |                   |
