# Supplementary material for: A Dipteran’s Novel Sucker Punch: Evolution of Arthropod Atypical Venom with a Neurotoxic Component in Robber Flies (Asilidae, Diptera)
Source: MDPI journal article supplement (doi:10.3390/toxins10010029), 2018-01-05
Supplement: s1 [file s1]

| Protein Class         | Contig ID                                                                                                                                                                                                                                                                                                                                                                                                                                                                                                                                                                                                                                                                                                                                                                                                                                                                                                                                                                                                                                                                                                                                                                                                                                                                                                                                                                                  | TPM - Segemeht                                                                                                                                                                                | TPM - Kallisto                                                                                                                                                                                | Signal Peptide                                                                                                                                       | Protein Hit                                                                                                                                        | Protein Name                                                | false positive |
|-----------------------|--------------------------------------------------------------------------------------------------------------------------------------------------------------------------------------------------------------------------------------------------------------------------------------------------------------------------------------------------------------------------------------------------------------------------------------------------------------------------------------------------------------------------------------------------------------------------------------------------------------------------------------------------------------------------------------------------------------------------------------------------------------------------------------------------------------------------------------------------------------------------------------------------------------------------------------------------------------------------------------------------------------------------------------------------------------------------------------------------------------------------------------------------------------------------------------------------------------------------------------------------------------------------------------------------------------------------------------------------------------------------------------------|-----------------------------------------------------------------------------------------------------------------------------------------------------------------------------------------------|-----------------------------------------------------------------------------------------------------------------------------------------------------------------------------------------------|------------------------------------------------------------------------------------------------------------------------------------------------------|----------------------------------------------------------------------------------------------------------------------------------------------------|-------------------------------------------------------------|----------------|
| Aegyptin              | no hit                                                                                                                                                                                                                                                                                                                                                                                                                                                                                                                                                                                                                                                                                                                                                                                                                                                                                                                                                                                                                                                                                                                                                                                                                                                                                                                                                                                     | 0                                                                                                                                                                                             | 0                                                                                                                                                                                             | X                                                                                                                                                    | X                                                                                                                                                  |                                                             |                |
| Alpha-amylase         | Gene.55345:c11530_g5_i1_VG_Ma_ar_203:g.55345:m.55345                                                                                                                                                                                                                                                                                                                                                                                                                                                                                                                                                                                                                                                                                                                                                                                                                                                                                                                                                                                                                                                                                                                                                                                                                                                                                                                                       | 3368.40                                                                                                                                                                                       | 1964.30                                                                                                                                                                                       | YES                                                                                                                                                  | NO                                                                                                                                                 |                                                             |                |
| Anophelin             | no hit                                                                                                                                                                                                                                                                                                                                                                                                                                                                                                                                                                                                                                                                                                                                                                                                                                                                                                                                                                                                                                                                                                                                                                                                                                                                                                                                                                                     | 0                                                                                                                                                                                             | 0                                                                                                                                                                                             | X                                                                                                                                                    | X                                                                                                                                                  |                                                             |                |
| Apyrase               | Gene.124024:c57686_g1_i1_VG_Ma_ar_203:g.124024:m.124024<br>Gene.123955:c57638_g1_i1_VG_Ma_ar_203:g.123955:m.123955<br>Gene.84819:c16839_g1_i1_VG_Ma_ar_203:g.84819:m.84819<br>Gene.121725:c55358_g1_i1_VG_Ma_ar_203:g.121725:m.121725<br>Gene.124970:c58408_g1_i1_VG_Ma_ar_203:g.124970:m.124970<br>Gene.101276:c33896_g1_i1_VG_Ma_ar_203:g.101276:m.101276                                                                                                                                                                                                                                                                                                                                                                                                                                                                                                                                                                                                                                                                                                                                                                                                                                                                                                                                                                                                                                | 0.73<br>0.48<br>0.40<br>0.29<br>0.43<br>0.21                                                                                                                                                  | 0.31<br>0.27<br>0.82<br>0.46<br>0.00<br>0.00                                                                                                                                                  | NO<br>NO<br>NO<br>NO<br>NO<br>NO                                                                                                                     | NO<br>NO<br>NO<br>NO<br>NO<br>NO                                                                                                                   |                                                             |                |
| CAP                   | Gene.20169:c7787_g1_i1_VG_Ma_ar_203:g.20169:m.20169<br>Gene.28460:c9053_g1_i1_VG_Ma_ar_203:g.28460:m.28460<br>Gene.20913:c7931_g1_i1_VG_Ma_ar_203:g.20913:m.20913<br>Gene.103759:c36572_g1_i1_VG_Ma_ar_203:g.103759:m.103759                                                                                                                                                                                                                                                                                                                                                                                                                                                                                                                                                                                                                                                                                                                                                                                                                                                                                                                                                                                                                                                                                                                                                               | 9.93<br>5.47<br>2.80<br>0.21                                                                                                                                                                  | 5.28<br>3.43<br>1.39<br>0.00                                                                                                                                                                  | YES<br>YES<br>NO<br>NO                                                                                                                               | NO<br>NO<br>NO<br>NO                                                                                                                               |                                                             |                |
| Chitinase             | Gene.17914:c7381_g1_i1_VG_Ma_ar_203:g.17914:m.17914<br>Gene.45193:c10777_g1_i1_VG_Ma_ar_203:g.45193:m.45193<br>Gene.244:c123_g1_i1_VG_Ma_ar_203:g.244:m.244<br>Gene.101530:c34136_g1_i1_VG_Ma_ar_203:g.101530:m.101530<br>Gene.80874:c13493_g1_i1_VG_Ma_ar_203:g.80874:m.80874<br>Gene.98145:c31275_g1_i1_VG_Ma_ar_203:g.98145:m.98145<br>Gene.91863:c24312_g1_i1_VG_Ma_ar_203:g.91863:m.91863<br>Gene.97246:c30619_g1_i1_VG_Ma_ar_203:g.97246:m.97246<br>Gene.107463:c40636_g1_i1_VG_Ma_ar_203:g.107463:m.107463<br>Gene.89624:c22433_g1_i1_VG_Ma_ar_203:g.89624:m.89624<br>Gene.97972:c31143_g1_i1_VG_Ma_ar_203:g.97972:m.97972<br>Gene.93877:c26287_g1_i1_VG_Ma_ar_203:g.93877:m.93877<br>Gene.116667:c49942_g1_i1_VG_Ma_ar_203:g.116667:m.116667<br>Gene.130459:c64248_g1_i1_VG_Ma_ar_203:g.130459:m.130459<br>Gene.88261:c21310_g1_i1_VG_Ma_ar_203:g.88261:m.88261<br>Gene.91476:c23944_g1_i1_VG_Ma_ar_203:g.91476:m.91476                                                                                                                                                                                                                                                                                                                                                                                                                                                            | 36.23<br>13.59<br>1.79<br>1.78<br>0.40<br>0.92<br>0.25<br>0.29<br>0.34<br>0.23<br>0.22<br>0.22<br>0.27<br>0.30<br>0.19<br>0.13                                                                | 16.99<br>6.97<br>0.83<br>4.11<br>0.33<br>0.45<br>0.05<br>0.42<br>0.38<br>0.00<br>0.51<br>0.26<br>1.63<br>2.26<br>1.44<br>0.68                                                                 | YES<br>NO<br>YES<br>NO<br>YES<br>NO<br>NO<br>NO<br>NO<br>NO<br>NO<br>NO<br>NO<br>NO<br>NO<br>NO                                                      | NO<br>NO<br>NO<br>NO<br>NO<br>NO<br>NO<br>NO<br>NO<br>NO<br>NO<br>NO<br>NO<br>NO<br>NO<br>NO                                                       |                                                             |                |
| Conoporin-like        | no hit                                                                                                                                                                                                                                                                                                                                                                                                                                                                                                                                                                                                                                                                                                                                                                                                                                                                                                                                                                                                                                                                                                                                                                                                                                                                                                                                                                                     | 0                                                                                                                                                                                             | 0                                                                                                                                                                                             | X                                                                                                                                                    | X                                                                                                                                                  |                                                             |                |
| Csalpha/beta defensin | Gene.11823:c5912_g1_i1_VG_Ma_ar_203:g.11823:m.11823<br>Gene.20857:c7918_g1_i1_VG_Ma_ar_203:g.20857:m.20857<br>Gene.1068:c616_g1_i1_VG_Ma_ar_203:g.1068:m.1068<br>Gene.5942:c3498_g1_i1_VG_Ma_ar_203:g.5942:m.5942<br>Gene.107433:c40613_g1_i1_VG_Ma_ar_203:g.107433:m.107433                                                                                                                                                                                                                                                                                                                                                                                                                                                                                                                                                                                                                                                                                                                                                                                                                                                                                                                                                                                                                                                                                                               | 18.25<br>3.77<br>1.22<br>0.54<br>0.49                                                                                                                                                         | 30.07<br>8.18<br>0.79<br>0.65<br>0.87                                                                                                                                                         | YES<br>YES<br>NO<br>YES<br>NO                                                                                                                        | NO<br>NO<br>NO<br>NO<br>NO                                                                                                                         |                                                             |                |
| Cystatin              | no hit                                                                                                                                                                                                                                                                                                                                                                                                                                                                                                                                                                                                                                                                                                                                                                                                                                                                                                                                                                                                                                                                                                                                                                                                                                                                                                                                                                                     | 0                                                                                                                                                                                             | 0                                                                                                                                                                                             | X                                                                                                                                                    | X                                                                                                                                                  |                                                             |                |
| dICK'S                | no hit                                                                                                                                                                                                                                                                                                                                                                                                                                                                                                                                                                                                                                                                                                                                                                                                                                                                                                                                                                                                                                                                                                                                                                                                                                                                                                                                                                                     | 0                                                                                                                                                                                             | 0                                                                                                                                                                                             | X                                                                                                                                                    | X                                                                                                                                                  |                                                             |                |
| Disintegrine-like     | no hit                                                                                                                                                                                                                                                                                                                                                                                                                                                                                                                                                                                                                                                                                                                                                                                                                                                                                                                                                                                                                                                                                                                                                                                                                                                                                                                                                                                     | 0                                                                                                                                                                                             | 0                                                                                                                                                                                             | X                                                                                                                                                    | X                                                                                                                                                  |                                                             |                |
| Echotoxin-like        | no hit                                                                                                                                                                                                                                                                                                                                                                                                                                                                                                                                                                                                                                                                                                                                                                                                                                                                                                                                                                                                                                                                                                                                                                                                                                                                                                                                                                                     | 0                                                                                                                                                                                             | 0                                                                                                                                                                                             | X                                                                                                                                                    | X                                                                                                                                                  |                                                             |                |
| Gigantoxin-like       | no hit                                                                                                                                                                                                                                                                                                                                                                                                                                                                                                                                                                                                                                                                                                                                                                                                                                                                                                                                                                                                                                                                                                                                                                                                                                                                                                                                                                                     | 0                                                                                                                                                                                             | 0                                                                                                                                                                                             | X                                                                                                                                                    | X                                                                                                                                                  |                                                             |                |
| Hyaluronidase         | Gene.28757:c9090_g2_i1_VG_Ma_ar_203:g.28757:m.28757<br>Gene.28764:c9090_g2_i2_VG_Ma_ar_203:g.28764:m.28764<br>Gene.28756:c9090_g1_i2_VG_Ma_ar_203:g.28756:m.28756<br>Gene.28753:c9090_g1_i1_VG_Ma_ar_203:g.28753:m.28753<br>Gene.3918:c2263_g1_i1_VG_Ma_ar_203:g.3918:m.3918<br>Gene.107592:c40726_g1_i1_VG_Ma_ar_203:g.107592:m.107592                                                                                                                                                                                                                                                                                                                                                                                                                                                                                                                                                                                                                                                                                                                                                                                                                                                                                                                                                                                                                                                    | 3656.19<br>3619.17<br>3388.29<br>143.92<br>113.30<br>92.16                                                                                                                                    | 1457.11<br>261.50<br>2693.45<br>192.92<br>78.63<br>71.71                                                                                                                                      | YES<br>YES<br>NO<br>NO<br>NO<br>NO                                                                                                                   | NO<br>NO<br>NO<br>NO<br>NO<br>NO                                                                                                                   |                                                             |                |
| ICK's (Asilidin1)     | Gene.14531:c6656_g1_i1_VG_Ma_ar_203:g.14531:m.14531<br>Gene.1664:c945_g1_i1_VG_Ma_ar_203:g.1664:m.1664<br>Gene.107024:c40279_g1_i1_VG_Ma_ar_203:g.107024:m.107024<br>Gene.13642:c6412_g1_i1_VG_Ma_ar_203:g.13642:m.13642<br>Gene.16201:c7031_g1_i1_VG_Ma_ar_203:g.16201:m.16201<br>Gene.13643:c6412_g1_i2_VG_Ma_ar_203:g.13643:m.13643<br>Gene.10845:c5521_g1_i1_VG_Ma_ar_203:g.10845:m.10845<br>Gene.2190:c1225_g1_i1_VG_Ma_ar_203:g.2190:m.2190<br>Gene.15197:c6797_g1_i2_VG_Ma_ar_203:g.15197:m.15197<br>Gene.116437:c49732_g1_i1_VG_Ma_ar_203:g.116437:m.116437<br>Gene.110937:c43784_g1_i1_VG_Ma_ar_203:g.110937:m.110937<br>Gene.109832:c42699_g1_i1_VG_Ma_ar_203:g.109832:m.109832<br>Gene.8508:c4716_g1_i1_VG_Ma_ar_203:g.8508:m.8508                                                                                                                                                                                                                                                                                                                                                                                                                                                                                                                                                                                                                                              | 10503.09<br>2183.45<br>158.90<br>14.90<br>13.20<br>5.89<br>2.39<br>1.27<br>1.11<br>0.74<br>0.43<br>0.36<br>0.44                                                                               | 34056.90<br>6137.03<br>494.40<br>34.12<br>15.05<br>4.83<br>12.93<br>0.88<br>1.24<br>1.02<br>1.34<br>1.21<br>3.16                                                                              | YES<br>YES<br>YES<br>NO<br>YES<br>YES<br>YES<br>YES<br>YES<br>NO<br>NO<br>NO<br>NO                                                                   | YES<br>YES<br>YES<br>YES<br>NO<br>NO<br>NO<br>NO<br>NO<br>NO<br>NO<br>NO<br>NO                                                                     | U-Asilidin1-Mar1a<br>U-Asilidin1-Mar2a<br>U-Asilidin1-Mar3a |                |
| Kazal                 | Gene.18749:c7531_g1_i2_VG_Ma_ar_203:g.18749:m.18749<br>Gene.18522:c7488_g1_i1_VG_Ma_ar_203:g.18522:m.18522<br>Gene.18740:c7531_g1_i1_VG_Ma_ar_203:g.18740:m.18740<br>Gene.15959:c6979_g1_i2_VG_Ma_ar_203:g.15959:m.15959<br>Gene.2803:c1568_g1_i2_VG_Ma_ar_203:g.2803:m.2803<br>Gene.15957:c6979_g1_i1_VG_Ma_ar_203:g.15957:m.15957<br>Gene.89253:c22127_g1_i1_VG_Ma_ar_203:g.89253:m.89253<br>Gene.105938:c39487_g1_i1_VG_Ma_ar_203:g.105938:m.105938<br>Gene.21338:c8009_g1_i2_VG_Ma_ar_203:g.21338:m.21338<br>Gene.21333:c8009_g1_i1_VG_Ma_ar_203:g.21333:m.21333<br>Gene.7042:c4196_g1_i1_VG_Ma_ar_203:g.7042:m.7042<br>Gene.97792:c31014_g1_i1_VG_Ma_ar_203:g.97792:m.97792<br>Gene.88427:c21559_g1_i1_VG_Ma_ar_203:g.88427:m.88427<br>Gene.114606:c48259_g1_i1_VG_Ma_ar_203:g.114606:m.114606<br>Gene.2801:c1568_g1_i1_VG_Ma_ar_203:g.2801:m.2801<br>Gene.99070:c31951_g1_i1_VG_Ma_ar_203:g.99070:m.99070<br>Gene.106536:c39905_g1_i1_VG_Ma_ar_203:g.106536:m.106536<br>Gene.97136:c30550_g1_i1_VG_Ma_ar_203:g.97136:m.97136<br>Gene.9729:c5148_g1_i1_VG_Ma_ar_203:g.9729:m.9729<br>Gene.88545:c21635_g1_i1_VG_Ma_ar_203:g.88545:m.88545<br>Gene.101601:c34199_g1_i1_VG_Ma_ar_203:g.101601:m.101601<br>Gene.124742:c58235_g1_i1_VG_Ma_ar_203:g.124742:m.124742<br>Gene.111723:c44675_g1_i1_VG_Ma_ar_203:g.111723:m.111723<br>Gene.108168:c41174_g1_i1_VG_Ma_ar_203:g.108168:m.108168 | 1.95<br>12.51<br>1.75<br>5.61<br>1.22<br>4.55<br>4.39<br>0.69<br>2.12<br>1.80<br>1.40<br>0.60<br>2.00<br>1.15<br>0.81<br>0.45<br>0.44<br>0.43<br>0.43<br>0.36<br>0.32<br>0.25<br>0.21<br>0.08 | 1.01<br>42.71<br>0.09<br>7.53<br>0.76<br>4.12<br>8.42<br>0.33<br>2.00<br>1.20<br>1.04<br>1.04<br>2.33<br>1.48<br>0.00<br>0.26<br>0.18<br>0.29<br>0.77<br>0.33<br>0.55<br>1.36<br>0.93<br>1.20 | YES<br>YES<br>YES<br>NO<br>NO<br>NO<br>YES<br>NO<br>YES<br>YES<br>YES<br>NO<br>NO<br>NO<br>NO<br>YES<br>NO<br>NO<br>NO<br>NO<br>NO<br>NO<br>NO<br>NO | NO<br>NO<br>NO<br>NO<br>NO<br>NO<br>NO<br>NO<br>NO<br>NO<br>NO<br>NO<br>NO<br>NO<br>NO<br>NO<br>NO<br>NO<br>NO<br>NO<br>NO<br>NO<br>NO<br>NO<br>NO |                                                             | excluded       |
| Kazal (vasotab-like)  | Gene.18522:c7488_g1_i1_VG_Ma_ar_203:g.18522:m.18522<br>Gene.2803:c1568_g1_i2_VG_Ma_ar_203:g.2803:m.2803<br>Gene.105938:c39487_g1_i1_VG_Ma_ar_203:g.105938:m.105938<br>Gene.14165:c6545_g1_i1_VG_Ma_ar_203:g.14165:m.14165<br>Gene.14172:c6545_g1_i2_VG_Ma_ar_203:g.14172:m.14172<br>Gene.114606:c48259_g1_i1_VG_Ma_ar_203:g.114606:m.114606<br>Gene.2801:c1568_g1_i1_VG_Ma_ar_203:g.2801:m.2801<br>Gene.99070:c31951_g1_i1_VG_Ma_ar_203:g.99070:m.99070<br>Gene.14168:c6545_g2_i1_VG_Ma_ar_203:g.14168:m.14168<br>Gene.97136:c30550_g1_i1_VG_Ma_ar_203:g.97136:m.97136<br>Gene.88545:c21635_g1_i1_VG_Ma_ar_203:g.88545:m.88545<br>Gene.108168:c41174_g1_i1_VG_Ma_ar_203:g.108168:m.108168                                                                                                                                                                                                                                                                                                                                                                                                                                                                                                                                                                                                                                                                                                  | 12.51<br>1.22<br>0.69<br>1.96<br>1.83<br>1.15<br>0.81<br>0.45<br>0.61<br>0.43<br>0.36<br>0.08                                                                                                 | 42.71<br>0.76<br>0.33<br>1.19<br>0.00<br>1.48<br>0.00<br>0.26<br>1.63<br>0.29<br>0.33<br>1.20                                                                                                 | YES<br>NO<br>NO<br>YES<br>YES<br>NO<br>NO<br>YES<br>YES<br>NO<br>NO<br>NO                                                                            | NO<br>NO<br>NO<br>NO<br>NO<br>NO<br>NO<br>NO<br>NO<br>NO<br>NO<br>NO                                                                               |                                                             | excluded       |

|                            |                                                          |           |           |     |     |                    |
|----------------------------|----------------------------------------------------------|-----------|-----------|-----|-----|--------------------|
| Kunitz                     | Gene.21219::c7992_g1_i1_VG_Ma_ar_203:g.21219:m.21219     | 11.54     | 7.36      | YES | NO  | excluded           |
|                            | Gene.10407::c5358_g1_i1_VG_Ma_ar_203:g.10407:m.10407     | 1.16      | 0.51      | NO  | NO  |                    |
|                            | Gene.113889::c47766_g1_i1_VG_Ma_ar_203:g.113889:m.113889 | 1.45      | 0.70      | NO  | NO  |                    |
|                            | Gene.16390::c7075_g1_i1_VG_Ma_ar_203:g.16390:m.16390     | 3.72      | 4.28      | YES | NO  |                    |
|                            | Gene.12590::c6122_g1_i1_VG_Ma_ar_203:g.12590:m.12590     | 2.18      | 1.82      | YES | NO  |                    |
|                            | Gene.16393::c7075_g1_i2_VG_Ma_ar_203:g.16393:m.16393     | 2.02      | 2.39      | YES | NO  |                    |
|                            | Gene.117936::c51081_g1_i1_VG_Ma_ar_203:g.117936:m.117936 | 1.06      | 0.57      | NO  | NO  |                    |
|                            | Gene.80995::c13579_g1_i1_VG_Ma_ar_203:g.80995:m.80995    | 0.50      | 0.36      | NO  | NO  |                    |
|                            | Gene.11874::c5925_g1_i2_VG_Ma_ar_203:g.11874:m.11874     | 1.25      | 1.21      | YES | NO  |                    |
|                            | Gene.11871::c5925_g1_i1_VG_Ma_ar_203:g.11871:m.11871     | 1.13      | 0.86      | YES | NO  |                    |
|                            | Gene.98155::c31287_g1_i1_VG_Ma_ar_203:g.98155:m.98155    | 0.39      | 0.26      | YES | NO  |                    |
|                            | Gene.99576::c32365_g1_i1_VG_Ma_ar_203:g.99576:m.99576    | 0.46      | 0.67      | NO  | NO  |                    |
|                            | Gene.5595::c3272_g1_i1_VG_Ma_ar_203:g.5595:m.5595        | 0.45      | 0.40      | NO  | NO  |                    |
|                            | Gene.21222::c7992_g2_i1_VG_Ma_ar_203:g.21222:m.21222     | 0.51      | 0.47      | YES | NO  |                    |
|                            | Gene.84339::c16397_g1_i1_VG_Ma_ar_203:g.84339:m.84339    | 0.37      | 0.74      | YES | NO  |                    |
|                            | Gene.114882::c48469_g1_i1_VG_Ma_ar_203:g.114882:m.114882 | 0.26      | 0.41      | NO  | NO  |                    |
|                            | Gene.127770::c61022_g1_i1_VG_Ma_ar_203:g.127770:m.127770 | 0.32      | 0.00      | NO  | NO  |                    |
|                            | Gene.128733::c62005_g1_i1_VG_Ma_ar_203:g.128733:m.128733 | 0.26      | 0.36      | NO  | NO  |                    |
|                            |                                                          |           |           |     |     |                    |
|                            |                                                          |           |           |     |     |                    |
|                            |                                                          |           |           |     |     |                    |
|                            |                                                          |           |           |     |     |                    |
|                            |                                                          |           |           |     |     |                    |
|                            |                                                          |           |           |     |     |                    |
|                            |                                                          |           |           |     |     |                    |
| Lectin c-type              | Gene.72719::c12442_g1_i2_VG_Ma_ar_203:g.72719:m.72719    | 12.69     | 4.73      | YES | NO  | excluded           |
|                            | Gene.72706::c12442_g1_i1_VG_Ma_ar_203:g.72706:m.72706    | 11.50     | 1.96      | YES | NO  |                    |
|                            | Gene.74293::c12497_g1_i1_VG_Ma_ar_203:g.74293:m.74293    | 3.92      | 1.74      | NO  | NO  |                    |
|                            | Gene.46843::c10911_g1_i1_VG_Ma_ar_203:g.46843:m.46843    | 5.55      | 2.57      | YES | NO  |                    |
|                            | Gene.34389::c9787_g1_i1_VG_Ma_ar_203:g.34389:m.34389     | 12.00     | 7.41      | NO  | NO  |                    |
|                            | Gene.34398::c9787_g1_i2_VG_Ma_ar_203:g.34398:m.34398     | 5.29      | 2.68      | YES | NO  |                    |
|                            | Gene.76981::c12591_g2_i3_VG_Ma_ar_203:g.76981:m.76981    | 0.86      | 0.52      | NO  | NO  |                    |
|                            | Gene.124466::c58021_g1_i1_VG_Ma_ar_203:g.124466:m.124466 | 0.76      | 0.45      | NO  | NO  |                    |
|                            | Gene.3196::c1832_g1_i1_VG_Ma_ar_203:g.3196:m.3196        | 0.40      | 0.25      | NO  | NO  |                    |
|                            | Gene.123236::c57107_g1_i1_VG_Ma_ar_203:g.123236:m.123236 | 0.51      | 0.53      | NO  | NO  |                    |
|                            | Gene.85764::c17890_g1_i1_VG_Ma_ar_203:g.85764:m.85764    | 0.32      | 0.19      | NO  | NO  |                    |
|                            | Gene.112921::c46119_g1_i1_VG_Ma_ar_203:g.112921:m.112921 | 0.41      | 0.22      | NO  | NO  |                    |
|                            | Gene.86347::c18532_g1_i1_VG_Ma_ar_203:g.86347:m.86347    | 0.31      | 1.06      | NO  | NO  |                    |
| Lipocalin calycins         | Gene.23605::c8362_g1_i1_VG_Ma_ar_203:g.23605:m.23605     | 34.32     | 18.76     | YES | NO  |                    |
|                            | Gene.37491::c10076_g1_i1_VG_Ma_ar_203:g.37491:m.37491    | 5.72      | 4.38      | YES | NO  |                    |
| Maxadilan-like             | no hit                                                   | 0         | 0         | X   | X   |                    |
| MBF2-domain                | Gene.22058::c8127_g1_i1_VG_Ma_ar_203:g.22058:m.22058     | 13382.33  | 14289.60  | YES | YES |                    |
|                            | Gene.22705::c8233_g1_i1_VG_Ma_ar_203:g.22705:m.22705     | 7311.64   | 5886.31   | YES | YES |                    |
|                            | Gene.30540::c9325_g1_i1_VG_Ma_ar_203:g.30540:m.30540     | 6483.05   | 6001.45   | YES | YES |                    |
|                            | Gene.14157::c6543_g1_i1_VG_Ma_ar_203:g.14157:m.14157     | 2603.90   | 2619.80   | YES | YES |                    |
|                            | Gene.24708::c8530_g2_i1_VG_Ma_ar_203:g.24708:m.24708     | 1543.09   | 1549.42   | YES | YES |                    |
|                            | Gene.27218::c8887_g1_i1_VG_Ma_ar_203:g.27218:m.27218     | 119.03    | 130.91    | YES | NO  |                    |
|                            | Gene.23193::c8307_g1_i1_VG_Ma_ar_203:g.23193:m.23193     | 62.12     | 67.70     | YES | NO  |                    |
|                            | Gene.24703::c8530_g1_i1_VG_Ma_ar_203:g.24703:m.24703     | 60.56     | 51.86     | YES | NO  |                    |
|                            | Gene.14801::c6717_g1_i1_VG_Ma_ar_203:g.14801:m.14801     | 11.38     | 9.60      | YES | NO  |                    |
|                            | Gene.17235::c7246_g1_i4_VG_Ma_ar_203:g.17235:m.17235     | 11.92     | 24.34     | YES | NO  |                    |
|                            | Gene.97150::c30562_g1_i1_VG_Ma_ar_203:g.97150:m.97150    | 3.85      | 3.53      | NO  | NO  |                    |
|                            | Gene.14803::c6717_g1_i2_VG_Ma_ar_203:g.14803:m.14803     | 3.59      | 3.17      | YES | NO  |                    |
|                            |                                                          |           |           |     |     |                    |
|                            |                                                          |           |           |     |     |                    |
| Melittin-like              | no hit                                                   | 0         | 0         | X   | X   |                    |
| Natterin-like (Asilidin10) | Gene.27187::c8882_g1_i2_VG_Ma_ar_203:g.27187:m.27187     | 287.11    | 78.66     | NO  | YES | U-Asilidin10-Mar1a |
|                            | Gene.27181::c8882_g1_i1_VG_Ma_ar_203:g.27181:m.27181     | 371.25    | 220.64    | NO  | YES | U-Asilidin10-Mar1b |
|                            | Gene.39255::c10244_g1_i1_VG_Ma_ar_203:g.39255:m.39255    | 144.22    | 82.67     | NO  | NO  |                    |
|                            | Gene.31149::c9406_g3_i1_VG_Ma_ar_203:g.31149:m.31149     | 62.21     | 44.73     | NO  | NO  |                    |
|                            | Gene.30691::c9348_g2_i1_VG_Ma_ar_203:g.30691:m.30691     | 41.02     | 21.44     | NO  | NO  |                    |
|                            | Gene.21548::c8046_g1_i1_VG_Ma_ar_203:g.21548:m.21548     | 1.60      | 0.60      | NO  | NO  |                    |
|                            |                                                          |           |           |     |     |                    |
| Neurokinin-like            | no hit                                                   | 0         | 0         | X   | X   |                    |
| Nitrophorin-like           | no hit                                                   | 0         | 0         | X   | X   |                    |
| Novel protein (Asilidin2)  | Gene.39461::c10270_g1_i1_VG_Ma_ar_203:g.39461:m.39461    | 89677.87  | 50391.90  | YES | YES | U-Asilidin2-Mar1a  |
|                            | Gene.15717::c6926_g2_i2_VG_Ma_ar_203:g.15717:m.15717     | 63481.01  | 33897.70  | YES | YES | U-Asilidin2-Mar5a  |
|                            | Gene.27859::c8967_g2_i1_VG_Ma_ar_203:g.27859:m.27859     | 52155.36  | 29204.60  | YES | YES | U-Asilidin2-Mar2a  |
|                            | Gene.27205::c8885_g1_i1_VG_Ma_ar_203:g.27205:m.27205     | 32431.17  | 17831.50  | YES | YES | U-Asilidin2-Mar4a  |
|                            | Gene.36480::c9987_g1_i1_VG_Ma_ar_203:g.36480:m.36480     | 23928.14  | 13207.10  | YES | YES | U-Asilidin2-Mar3a  |
|                            | Gene.27405::c8910_g1_i1_VG_Ma_ar_203:g.27405:m.27405     | 15245.66  | 8564.66   | YES | YES | U-Asilidin2-Mar5a  |
|                            | Gene.31085::c9400_g3_i1_VG_Ma_ar_203:g.31085:m.31085     | 6280.55   | 3774.55   | YES | YES | U-Asilidin2-Mar5a  |
|                            | Gene.35004::c9845_g2_i1_VG_Ma_ar_203:g.35004:m.35004     | 3485.47   | 3784.43   | YES | YES | U-Asilidin2-Mar8a  |
|                            | Gene.35009::c9845_g2_i2_VG_Ma_ar_203:g.35009:m.35009     | 1746.77   | 750.04    | YES | NO  | U-Asilidin2-Mar7a  |
|                            | Gene.16974::c7198_g1_i1_VG_Ma_ar_203:g.16974:m.16974     | 40.99     | 28.94     | YES | NO  |                    |
|                            | Gene.123596::c57367_g1_i1_VG_Ma_ar_203:g.123596:m.123596 | 3.51      | 2.49      | NO  | NO  |                    |
|                            | Gene.11712::c5868_g1_i1_VG_Ma_ar_203:g.11712:m.11712     | 1.31      | 0.67      | YES | NO  |                    |
|                            | Gene.81909::c14296_g1_i1_VG_Ma_ar_203:g.81909:m.81909    | 1.25      | 0.59      | YES | NO  |                    |
|                            |                                                          |           |           |     |     |                    |
|                            |                                                          |           |           |     |     |                    |
| Novel protein (Asilidin3)  | Gene.12999::c6237_g1_i1_VG_Ma_ar_203:g.12999:m.12999     | 102696.52 | 118265.00 | YES | YES | U-Asilidin3-Mar1a  |
|                            | Gene.19005::c7574_g1_i1_VG_Ma_ar_203:g.19005:m.19005     | 64327.20  | 68838.30  | YES | YES | U-Asilidin3-Mar1b  |
| Novel protein (Asilidin4)  | Gene.28195::c9018_g3_i1_VG_Ma_ar_203:g.28195:m.28195     | 23364.05  | 25950.30  | NO  | YES | U-Asilidin4-Mar1a  |
| Novel protein (Asilidin5)  | Gene.33857::c9725_g1_i1_VG_Ma_ar_203:g.33857:m.33857     | 7486.13   | 3753.84   | YES | NO  |                    |
|                            | Gene.105450::c39128_g1_i1_VG_Ma_ar_203:g.105450:m.105450 | 2819.97   | 2391.12   | NO  | NO  |                    |
|                            | Gene.80917::c13524_g1_i1_VG_Ma_ar_203:g.80917:m.80917    | 1908.19   | 2264.93   | NO  | NO  |                    |
| Novel protein (Asilidin6)  | Gene.2154::c1207_g1_i2_VG_Ma_ar_203:g.2154:m.2154        | 1320.41   | 820.05    | NO  | YES | U-Asilidin6-Mar1a  |
|                            | Gene.2148::c1207_g1_i1_VG_Ma_ar_203:g.2148:m.2148        | 1420.80   | 202.38    | NO  | YES | U-Asilidin6-Mar1b  |
|                            | Gene.89382::c22237_g1_i1_VG_Ma_ar_203:g.89382:m.89382    | 268.31    | 225.25    | NO  | NO  |                    |
| Novel protein (Asilidin7)  | Gene.34206::c9761_g1_i1_VG_Ma_ar_203:g.34206:m.34206     | 483.10    | 406.64    | YES | YES | U-Asilidin7-Mar1a  |
|                            | Gene.117828::c50982_g1_i1_VG_Ma_ar_203:g.117828:m.117828 | 1.30      | 5.91      | NO  | NO  |                    |
| Peptidase M12              | Gene.41932::c10499_g1_i1_VG_Ma_ar_203:g.41932:m.41932    | 2.03      | 0.78      | NO  | NO  |                    |
|                            | Gene.32494::c9568_g1_i1_VG_Ma_ar_203:g.32494:m.32494     | 3.01      | 0.66      | YES | NO  |                    |
|                            | Gene.32526::c9568_g1_i3_VG_Ma_ar_203:g.32526:m.32526     | 3.06      | 0.56      | YES | NO  |                    |
|                            | Gene.64046::c12048_g1_i1_VG_Ma_ar_203:g.64046:m.64046    | 3.37      | 1.54      | NO  | NO  |                    |
|                            | Gene.32514::c9568_g1_i2_VG_Ma_ar_203:g.32514:m.32514     | 3.18      | 0.09      | NO  | NO  |                    |
|                            | Gene.41948::c10499_g1_i2_VG_Ma_ar_203:g.41948:m.41948    | 1.79      | 0.08      | NO  | NO  |                    |
|                            | Gene.10953::c5561_g1_i2_VG_Ma_ar_203:g.10953:m.10953     | 2.24      | 1.33      | YES | NO  |                    |
|                            | Gene.64060::c12048_g1_i2_VG_Ma_ar_203:g.64060:m.64060    | 2.93      | 0.71      | NO  | NO  |                    |
|                            | Gene.74611::c12509_g1_i1_VG_Ma_ar_203:g.74611:m.74611    | 1.38      | 0.60      | NO  | NO  |                    |
|                            | Gene.74644::c12509_g1_i5_VG_Ma_ar_203:g.74644:m.74644    | 1.58      | 0.38      | NO  | NO  |                    |
|                            | Gene.80467::c13221_g1_i1_VG_Ma_ar_203:g.80467:m.80467    | 0.57      | 0.43      | NO  | NO  |                    |
|                            | Gene.117852::c51002_g1_i1_VG_Ma_ar_203:g.117852:m.117852 | 0.32      | 0.43      | NO  | NO  |                    |
|                            |                                                          |           |           |     |     |                    |
|                            |                                                          |           |           |     |     |                    |
| Peptidase M13              | Gene.57706::c11672_g1_i1_VG_Ma_ar_203:g.57706:m.57706    | 452.63    | 240.37    | NO  | NO  |                    |
|                            | Gene.40742::c10398_g1_i1_VG_Ma_ar_203:g.40742:m.40742    | 12.47     | 2.04      | NO  | NO  |                    |
|                            | Gene.40753::c10398_g1_i3_VG_Ma_ar_203:g.40753:m.40753    | 12.47     | 2.04      | NO  | NO  |                    |
|                            | Gene.40763::c10398_g1_i4_VG_Ma_ar_203:g.40763:m.40763    | 12.47     | 2.04      | NO  | NO  |                    |
|                            | Gene.51637::c11263_g1_i1_VG_Ma_ar_203:g.51637:m.51637    | 4.84      | 2.57      | NO  | NO  |                    |

|               |                                                          |          |          |     |     |
|---------------|----------------------------------------------------------|----------|----------|-----|-----|
|               | Gene.22282::c8168_g1_i1_VG_Ma_ar_203:g.22282:m.22282     | 3.94     | 1.52     | YES | NO  |
|               | Gene.33379::c9668_g1_i1_VG_Ma_ar_203:g.33379:m.33379     | 3.42     | 2.16     | YES | NO  |
|               | Gene.29053::c9132_g1_i1_VG_Ma_ar_203:g.29053:m.29053     | 3.62     | 1.97     | YES | NO  |
|               | Gene.24254::c8452_g1_i2_VG_Ma_ar_203:g.24254:m.24254     | 1.87     | 1.04     | YES | NO  |
|               | Gene.17881::c7373_g1_i1_VG_Ma_ar_203:g.17881:m.17881     | 3.25     | 3.39     | NO  | NO  |
|               | Gene.40774::c10398_g1_i5_VG_Ma_ar_203:g.40774:m.40774    | 3.66     | 0.00     | NO  | NO  |
|               | Gene.1909::c1074_g1_i1_VG_Ma_ar_203:g.1909:m.1909        | 0.63     | 0.44     | NO  | NO  |
|               | Gene.108510::c41473_g1_i1_VG_Ma_ar_203:g.108510:m.108510 | 0.43     | 0.26     | NO  | NO  |
|               | Gene.125690::c59014_g1_i1_VG_Ma_ar_203:g.125690:m.125690 | 0.66     | 0.49     | NO  | NO  |
|               | Gene.80980::c13569_g1_i1_VG_Ma_ar_203:g.80980:m.80980    | 0.48     | 0.27     | NO  | NO  |
|               | Gene.101785::c34397_g1_i1_VG_Ma_ar_203:g.101785:m.101785 | 0.52     | 0.34     | NO  | NO  |
|               | Gene.106580::c39940_g1_i1_VG_Ma_ar_203:g.106580:m.106580 | 0.62     | 0.28     | NO  | NO  |
|               | Gene.109722::c42596_g1_i1_VG_Ma_ar_203:g.109722:m.109722 | 0.52     | 0.54     | NO  | NO  |
|               | Gene.80304::c13096_g1_i1_VG_Ma_ar_203:g.80304:m.80304    | 0.43     | 0.44     | NO  | NO  |
|               | Gene.99226::c32057_g1_i1_VG_Ma_ar_203:g.99226:m.99226    | 0.38     | 0.55     | NO  | NO  |
|               | Gene.445::c214_g1_i1_VG_Ma_ar_203:g.445:m.445            | 0.44     | 0.45     | NO  | NO  |
|               | Gene.100288::c32968_g1_i1_VG_Ma_ar_203:g.100288:m.100288 | 0.36     | 0.31     | NO  | NO  |
|               | Gene.98425::c31492_g1_i1_VG_Ma_ar_203:g.98425:m.98425    | 0.29     | 0.24     | NO  | NO  |
|               | Gene.109140::c42062_g1_i1_VG_Ma_ar_203:g.109140:m.109140 | 0.34     | 0.33     | NO  | NO  |
|               | Gene.83738::c15823_g1_i1_VG_Ma_ar_203:g.83738:m.83738    | 0.45     | 0.67     | YES | NO  |
|               | Gene.85161::c17175_g1_i1_VG_Ma_ar_203:g.85161:m.85161    | 0.39     | 0.00     | NO  | NO  |
|               | Gene.87714::c20274_g1_i1_VG_Ma_ar_203:g.87714:m.87714    | 0.33     | 0.24     | NO  | NO  |
|               | Gene.116261::c49583_g1_i1_VG_Ma_ar_203:g.116261:m.116261 | 0.36     | 0.28     | NO  | NO  |
|               | Gene.93430::c25834_g1_i1_VG_Ma_ar_203:g.93430:m.93430    | 0.37     | 0.23     | NO  | NO  |
|               | Gene.90723::c23314_g1_i1_VG_Ma_ar_203:g.90723:m.90723    | 0.38     | 1.27     | NO  | NO  |
|               | Gene.120764::c54070_g1_i1_VG_Ma_ar_203:g.120764:m.120764 | 0.36     | 0.55     | NO  | NO  |
|               | Gene.84463::c16497_g1_i1_VG_Ma_ar_203:g.84463:m.84463    | 0.24     | 0.15     | YES | NO  |
|               | Gene.128121::c61390_g1_i1_VG_Ma_ar_203:g.128121:m.128121 | 0.29     | 0.70     | NO  | NO  |
|               | Gene.2603::c1433_g1_i1_VG_Ma_ar_203:g.2603:m.2603        | 0.34     | 0.49     | NO  | NO  |
|               | Gene.94349::c26824_g1_i1_VG_Ma_ar_203:g.94349:m.94349    | 0.24     | 0.00     | NO  | NO  |
|               | Gene.87683::c20228_g1_i1_VG_Ma_ar_203:g.87683:m.87683    | 0.24     | 1.03     | NO  | NO  |
|               | Gene.88118::c20979_g1_i1_VG_Ma_ar_203:g.88118:m.88118    | 0.32     | 0.72     | NO  | NO  |
|               | Gene.108651::c41604_g1_i1_VG_Ma_ar_203:g.108651:m.108651 | 0.34     | 1.63     | NO  | NO  |
|               | Gene.115761::c49178_g1_i1_VG_Ma_ar_203:g.115761:m.115761 | 0.25     | 0.74     | NO  | NO  |
|               | Gene.127808::c61059_g1_i1_VG_Ma_ar_203:g.127808:m.127808 | 0.23     | 0.59     | NO  | NO  |
|               | Gene.95007::c27539_g1_i1_VG_Ma_ar_203:g.95007:m.95007    | 0.21     | 0.39     | NO  | NO  |
|               | Gene.102092::c34726_g1_i1_VG_Ma_ar_203:g.102092:m.102092 | 0.26     | 1.44     | NO  | NO  |
|               | Gene.115277::c48786_g1_i1_VG_Ma_ar_203:g.115277:m.115277 | 0.20     | 0.00     | NO  | NO  |
|               | Gene.82416::c14711_g1_i1_VG_Ma_ar_203:g.82416:m.82416    | 0.16     | 0.00     | NO  | NO  |
|               | Gene.87957::c20683_g1_i1_VG_Ma_ar_203:g.87957:m.87957    | 0.18     | 1.14     | NO  | NO  |
| Peptidase M14 | Gene.52743::c11342_g1_i2_VG_Ma_ar_203:g.52743:m.52743    | 27.97    | 11.42    | YES | NO  |
|               | Gene.52731::c11342_g1_i1_VG_Ma_ar_203:g.52731:m.52731    | 26.33    | 1.78     | YES | NO  |
|               | Gene.18855::c7548_g1_i1_VG_Ma_ar_203:g.18855:m.18855     | 2.07     | 0.96     | YES | NO  |
|               | Gene.81848::c14254_g1_i1_VG_Ma_ar_203:g.81848:m.81848    | 0.46     | 0.23     | NO  | NO  |
|               | Gene.83718::c15804_g1_i1_VG_Ma_ar_203:g.83718:m.83718    | 0.40     | 0.12     | NO  | NO  |
|               | Gene.107924::c40989_g1_i1_VG_Ma_ar_203:g.107924:m.107924 | 0.82     | 1.65     | NO  | NO  |
|               | Gene.92348::c24751_g1_i1_VG_Ma_ar_203:g.92348:m.92348    | 0.43     | 0.62     | NO  | NO  |
|               | Gene.117224::c50433_g1_i1_VG_Ma_ar_203:g.117224:m.117224 | 0.32     | 0.65     | NO  | NO  |
|               | Gene.103088::c35760_g1_i1_VG_Ma_ar_203:g.103088:m.103088 | 0.46     | 1.53     | NO  | NO  |
|               | Gene.100884::c33514_g1_i1_VG_Ma_ar_203:g.100884:m.100884 | 0.33     | 1.40     | NO  | NO  |
|               | Gene.95347::c27944_g1_i1_VG_Ma_ar_203:g.95347:m.95347    | 0.34     | 0.00     | NO  | NO  |
|               | Gene.111775::c44732_g1_i1_VG_Ma_ar_203:g.111775:m.111775 | 0.26     | 0.77     | NO  | NO  |
|               | Gene.129656::c63102_g1_i1_VG_Ma_ar_203:g.129656:m.129656 | 0.23     | 0.00     | NO  | NO  |
|               |                                                          |          |          |     |     |
|               |                                                          |          |          |     |     |
|               |                                                          |          |          |     |     |
|               |                                                          |          |          |     |     |
| Peptidase S10 | Gene.43100::c10605_g1_i1_VG_Ma_ar_203:g.43100:m.43100    | 44.04    | 21.15    | YES | NO  |
|               | Gene.127482::c60736_g1_i1_VG_Ma_ar_203:g.127482:m.127482 | 0.85     | 0.43     | NO  | NO  |
|               | Gene.91327::c23808_g1_i1_VG_Ma_ar_203:g.91327:m.91327    | 0.22     | 0.89     | NO  | NO  |
| Peptidase S1  | Gene.24008::c8418_g1_i1_VG_Ma_ar_203:g.24008:m.24008     | 25032.39 | 14354.20 | YES | YES |
|               | Gene.49420::c11103_g1_i1_VG_Ma_ar_203:g.49420:m.49420    | 9902.62  | 7107.75  | YES | YES |
|               | Gene.21993::c8116_g1_i1_VG_Ma_ar_203:g.21993:m.21993     | 7318.34  | 4550.38  | YES | YES |
|               | Gene.20901::c7927_g1_i1_VG_Ma_ar_203:g.20901:m.20901     | 7824.18  | 4699.38  | NO  | NO  |
|               | Gene.30642::c9342_g1_i1_VG_Ma_ar_203:g.30642:m.30642     | 1077.82  | 520.44   | YES | NO  |
|               | Gene.33669::c9700_g1_i1_VG_Ma_ar_203:g.33669:m.33669     | 1347.46  | 992.35   | YES | NO  |
|               | Gene.34279::c9773_g1_i1_VG_Ma_ar_203:g.34279:m.34279     | 952.75   | 436.57   | YES | YES |
|               | Gene.34284::c9773_g1_i2_VG_Ma_ar_203:g.34284:m.34284     | 865.63   | 165.88   | YES | YES |
|               | Gene.3304::c1909_g1_i1_VG_Ma_ar_203:g.3304:m.3304        | 825.20   | 688.64   | NO  | NO  |
|               | Gene.7767::c4486_g1_i1_VG_Ma_ar_203:g.7767:m.7767        | 198.47   | 109.06   | NO  | NO  |
|               | Gene.29134::c9144_g1_i1_VG_Ma_ar_203:g.29134:m.29134     | 150.01   | 77.21    | YES | NO  |
|               | Gene.29140::c9144_g1_i2_VG_Ma_ar_203:g.29140:m.29140     | 146.09   | 43.37    | YES | NO  |
|               | Gene.18172::c7426_g1_i1_VG_Ma_ar_203:g.18172:m.18172     | 98.78    | 69.23    | NO  | NO  |
|               | Gene.32804::c9593_g1_i2_VG_Ma_ar_203:g.32804:m.32804     | 40.47    | 24.90    | NO  | NO  |
|               | Gene.53083::c11368_g1_i1_VG_Ma_ar_203:g.53083:m.53083    | 16.84    | 3.47     | NO  | NO  |
|               | Gene.44359::c10710_g1_i1_VG_Ma_ar_203:g.44359:m.44359    | 15.79    | 8.02     | YES | NO  |
|               | Gene.37774::c10097_g1_i1_VG_Ma_ar_203:g.37774:m.37774    | 18.47    | 10.14    | YES | NO  |
|               | Gene.53088::c11368_g1_i2_VG_Ma_ar_203:g.53088:m.53088    | 31.94    | 17.91    | NO  | NO  |
|               | Gene.17508::c7298_g1_i1_VG_Ma_ar_203:g.17508:m.17508     | 15.82    | 8.79     | YES | NO  |
|               | Gene.21994::c8116_g1_i1_VG_Ma_ar_203:g.21994:m.21994     | 15.71    | 9.10     | YES | NO  |
|               | Gene.44363::c10710_g1_i2_VG_Ma_ar_203:g.44363:m.44363    | 9.81     | 5.18     | YES | NO  |
|               | Gene.71236::c12373_g1_i1_VG_Ma_ar_203:g.71236:m.71236    | 7.72     | 2.43     | NO  | NO  |
|               | Gene.71239::c12373_g1_i2_VG_Ma_ar_203:g.71239:m.71239    | 7.78     | 1.90     | NO  | NO  |
|               | Gene.116699::c49966_g1_i1_VG_Ma_ar_203:g.116699:m.116699 | 8.83     | 4.12     | NO  | NO  |
|               | Gene.1514::c880_g1_i1_VG_Ma_ar_203:g.1514:m.1514         | 8.89     | 4.27     | YES | NO  |
|               | Gene.17550::c7307_g1_i1_VG_Ma_ar_203:g.17550:m.17550     | 6.25     | 3.41     | NO  | NO  |
|               | Gene.53087::c11368_g1_i2_VG_Ma_ar_203:g.53087:m.53087    | 7.75     | 1.98     | NO  | NO  |
|               | Gene.25395::c8629_g1_i1_VG_Ma_ar_203:g.25395:m.25395     | 5.37     | 1.68     | YES | NO  |
|               | Gene.25397::c8629_g1_i2_VG_Ma_ar_203:g.25397:m.25397     | 5.37     | 1.68     | YES | NO  |
|               | Gene.81088::c13558_g1_i1_VG_Ma_ar_203:g.81088:m.81088    | 4.82     | 2.77     | YES | NO  |
|               | Gene.23988::c8416_g1_i1_VG_Ma_ar_203:g.23988:m.23988     | 3.17     | 1.33     | YES | NO  |
|               | Gene.36312::c9972_g1_i2_VG_Ma_ar_203:g.36312:m.36312     | 2.53     | 1.15     | YES | NO  |
|               | Gene.7233::c4273_g1_i1_VG_Ma_ar_203:g.7233:m.7233        | 4.75     | 2.55     | YES | NO  |
|               | Gene.32896::c9607_g1_i1_VG_Ma_ar_203:g.32896:m.32896     | 4.77     | 2.58     | YES | NO  |
|               | Gene.37977::c10118_g1_i1_VG_Ma_ar_203:g.37977:m.37977    | 2.79     | 1.47     | YES | NO  |
|               | Gene.36304::c9972_g1_i1_VG_Ma_ar_203:g.36304:m.36304     | 2.13     | 0.89     | YES | NO  |
|               | Gene.99340::c32155_g1_i1_VG_Ma_ar_203:g.99340:m.99340    | 3.59     | 1.71     | YES | NO  |
|               | Gene.19467::c7663_g1_i1_VG_Ma_ar_203:g.19467:m.19467     | 3.28     | 1.75     | YES | NO  |
|               | Gene.20757::c7898_g1_i1_VG_Ma_ar_203:g.20757:m.20757     | 2.42     | 1.21     | YES | NO  |
|               | Gene.538::c263_g1_i1_VG_Ma_ar_203:g.538:m.538            | 2.32     | 1.14     | YES | NO  |
|               | Gene.22476::c8197_g1_i1_VG_Ma_ar_203:g.22476:m.22476     | 1.65     | 0.85     | YES | NO  |
|               | Gene.97292::c30654_g1_i1_VG_Ma_ar_203:g.97292:m.97292    | 1.64     | 0.97     | YES | NO  |
|               | Gene.8754::c4799_g1_i1_VG_Ma_ar_203:g.8754:m.8754        | 2.01     | 1.08     | NO  | NO  |
|               | Gene.14070::c6525_g1_i1_VG_Ma_ar_203:g.14070:m.14070     | 1.04     | 0.48     | NO  | NO  |
|               | Gene.91176::c23679_g1_i1_VG_Ma_ar_203:g.91176:m.91176    | 1.81     | 0.94     | NO  | NO  |
|               | Gene.14390::c6616_g1_i1_VG_Ma_ar_203:g.14390:m.14390     | 2.14     | 1.15     | YES | NO  |
|               | Gene.3939::c2275_g1_i1_VG_Ma_ar_203:g.3939:m.3939        | 2.24     | 1.18     | YES | NO  |
|               | Gene.122596::c56668_g1_i1_VG_Ma_ar_203:g.122596:m.122596 | 1.35     | 0.55     | NO  | NO  |
|               | Gene.9132::c4934_g1_i1_VG_Ma_ar_203:g.9132:m.9132        | 0.96     | 0.57     | YES | NO  |
|               | Gene.21425::c8027_g1_i1_VG_Ma_ar_203:g.21425:m.21425     | 1.74     | 0.97     | NO  | NO  |
|               | Gene.6600::c3929_g1_i1_VG_Ma_ar_203:g.6600:m.6600        | 9.82     | 22.37    | NO  | NO  |
|               | Gene.11041::c5590_g1_i1_VG_Ma_ar_203:g.11041:m.11041     | 1.06     | 0.57     | NO  | NO  |
|               | Gene.15847::c6958_g2_i1_VG_Ma_ar_203:g.15847:m.15847     | 0.75     | 0.47     | NO  | NO  |
|               | Gene.92146::c24578_g1_i1_VG_Ma_ar_203:g.92146:m.92146    | 1.70     | 0.89     | YES | NO  |
|               | Gene.22189::c8146_g2_i1_VG_Ma_ar_203:g.22189:m.22189     | 0.94     | 0.62     | YES | NO  |
|               | Gene.98141::c31272_g1_i1_VG_Ma_ar_203:g.98141:m.98141    | 5.11     | 2.60     | NO  | NO  |
|               | Gene.13246::c6310_g1_i1_VG_Ma_ar_203:g.13246:m.13246     | 1.17     | 0.73     | YES | NO  |
|               | Gene.5139::c3031_g1_i1_VG_Ma_ar_203:g.5139:m.5139        | 5.72     | 20.59    | NO  | NO  |
|               | Gene.6912::c4142_g1_i1_VG_Ma_ar_203:g.6912:m.6912        | 1.36     | 0.90     | NO  | NO  |
|               | Gene.8769::c4803_g1_i1_VG_Ma_ar_203:g.8769:m.8769        | 1.03     | 0.53     | YES | NO  |
|               | Gene.7924::c4528_g1_i1_VG_Ma_ar_203:g.7924:m.7924        | 0.88     | 0.54     | YES | NO  |
|               | Gene.116522::c49813_g1_i1_VG_Ma_ar_203:g.116522:m.116522 | 4.08     | 5.72     | NO  | NO  |
|               | Gene.6224::c3683_g1_i1_VG_Ma_ar_203:g.6224:m.6224        | 0.88     | 0.52     | NO  | NO  |
|               | Gene.116123::c49487_g1_i1_VG_Ma_ar_203:g.116123:m.116123 | 0.98     | 0.41     | NO  | NO  |
|               | Gene.122761::c56769_g1_i1_VG_Ma_ar_203:g.122761:m.122761 | 1.24     | 0.54     | NO  | NO  |
|               | Gene.101437::c34050_g1_i1_VG_Ma_ar_203:g.101437:m.101437 | 3.72     | 6.69     | NO  | NO  |
|               | Gene.81316::c13819_g1_i1_VG_Ma_ar_203:g.81316:m.81316    | 0.65     | 0.28     | YES | NO  |

excluded

|                  |                                                         |          |         |     |     |
|------------------|---------------------------------------------------------|----------|---------|-----|-----|
|                  | Gene.125982:c59271_g1_i1_VG_Ma_ar_203:g.125982:m.125982 | 0.84     | 0.57    | NO  | NO  |
|                  | Gene.88318:c21487_g1_i1_VG_Ma_ar_203:g.88318:m.88318    | 0.56     | 0.32    | NO  | NO  |
|                  | Gene.10160:c5290_g1_i1_VG_Ma_ar_203:g.10160:m.10160     | 1.24     | 0.85    | YES | NO  |
|                  | Gene.4502:c2602_g1_i1_VG_Ma_ar_203:g.4502:m.4502        | 0.72     | 0.49    | NO  | NO  |
|                  | Gene.6015:c3551_g1_i1_VG_Ma_ar_203:g.6015:m.6015        | 0.87     | 0.69    | NO  | NO  |
|                  | Gene.755:c396_g1_i1_VG_Ma_ar_203:g.755:m.755            | 0.71     | 0.39    | NO  | NO  |
|                  | Gene.2552:c1411_g1_i1_VG_Ma_ar_203:g.2552:m.2552        | 2.10     | 4.34    | NO  | NO  |
|                  | Gene.85705:c17813_g1_i1_VG_Ma_ar_203:g.85705:m.85705    | 0.59     | 0.40    | NO  | NO  |
|                  | Gene.116244:c49574_g1_i1_VG_Ma_ar_203:g.116244:m.116244 | 0.53     | 0.32    | NO  | NO  |
|                  | Gene.80001:c12877_g1_i1_VG_Ma_ar_203:g.80001:m.80001    | 0.65     | 0.33    | NO  | NO  |
|                  | Gene.98436:c31498_g1_i1_VG_Ma_ar_203:g.98436:m.98436    | 0.69     | 0.48    | YES | NO  |
|                  | Gene.90704:c23301_g1_i1_VG_Ma_ar_203:g.90704:m.90704    | 0.51     | 0.41    | YES | NO  |
|                  | Gene.97836:c31040_g1_i1_VG_Ma_ar_203:g.97836:m.97836    | 0.63     | 0.23    | YES | NO  |
|                  | Gene.4090:c2349_g1_i1_VG_Ma_ar_203:g.4090:m.4090        | 0.52     | 0.23    | NO  | NO  |
|                  | Gene.88372:c21520_g1_i1_VG_Ma_ar_203:g.88372:m.88372    | 0.62     | 0.33    | NO  | NO  |
|                  | Gene.113947:c47808_g1_i1_VG_Ma_ar_203:g.113947:m.113947 | 0.43     | 0.21    | NO  | NO  |
|                  | Gene.101927:c34537_g1_i1_VG_Ma_ar_203:g.101927:m.101927 | 0.64     | 0.46    | NO  | NO  |
|                  | Gene.126156:c59434_g1_i1_VG_Ma_ar_203:g.126156:m.126156 | 0.60     | 0.30    | NO  | NO  |
|                  | Gene.84248:c16302_g1_i1_VG_Ma_ar_203:g.84248:m.84248    | 0.71     | 0.96    | NO  | NO  |
|                  | Gene.98247:c31355_g1_i1_VG_Ma_ar_203:g.98247:m.98247    | 0.63     | 0.51    | NO  | NO  |
|                  | Gene.100276:c32961_g1_i1_VG_Ma_ar_203:g.100276:m.100276 | 0.46     | 0.40    | NO  | NO  |
|                  | Gene.98055:c31202_g1_i1_VG_Ma_ar_203:g.98055:m.98055    | 0.54     | 0.15    | NO  | NO  |
|                  | Gene.83612:c15705_g1_i1_VG_Ma_ar_203:g.83612:m.83612    | 0.85     | 0.98    | NO  | NO  |
|                  | Gene.3531:c2042_g1_i1_VG_Ma_ar_203:g.3531:m.3531        | 0.64     | 0.44    | NO  | NO  |
|                  | Gene.82679:c14914_g1_i1_VG_Ma_ar_203:g.82679:m.82679    | 0.71     | 0.89    | NO  | NO  |
|                  | Gene.102365:c35010_g1_i1_VG_Ma_ar_203:g.102365:m.102365 | 0.37     | 0.37    | NO  | NO  |
|                  | Gene.107008:c40267_g1_i1_VG_Ma_ar_203:g.107008:m.107008 | 0.32     | 0.17    | NO  | NO  |
|                  | Gene.122754:c56765_g1_i1_VG_Ma_ar_203:g.122754:m.122754 | 0.40     | 0.18    | NO  | NO  |
|                  | Gene.127849:c61095_g1_i1_VG_Ma_ar_203:g.127849:m.127849 | 1.38     | 2.58    | NO  | NO  |
|                  | Gene.107855:c40935_g1_i1_VG_Ma_ar_203:g.107855:m.107855 | 0.22     | 0.57    | NO  | NO  |
|                  | Gene.127108:c60352_g1_i1_VG_Ma_ar_203:g.127108:m.127108 | 0.36     | 0.24    | NO  | NO  |
|                  | Gene.6255:c3702_g1_i1_VG_Ma_ar_203:g.6255:m.6255        | 0.50     | 0.41    | YES | NO  |
|                  | Gene.126776:c60034_g1_i1_VG_Ma_ar_203:g.126776:m.126776 | 0.40     | 0.08    | NO  | NO  |
|                  | Gene.82630:c14875_g1_i1_VG_Ma_ar_203:g.82630:m.82630    | 0.40     | 0.26    | NO  | NO  |
|                  | Gene.84907:c16942_g1_i1_VG_Ma_ar_203:g.84907:m.84907    | 0.81     | 0.89    | NO  | NO  |
|                  | Gene.92213:c24641_g1_i1_VG_Ma_ar_203:g.92213:m.92213    | 0.41     | 0.11    | NO  | NO  |
|                  | Gene.102076:c34713_g1_i1_VG_Ma_ar_203:g.102076:m.102076 | 0.25     | 0.15    | NO  | NO  |
|                  | Gene.103792:c36616_g1_i1_VG_Ma_ar_203:g.103792:m.103792 | 0.62     | 1.09    | NO  | NO  |
|                  | Gene.81272:c13783_g1_i1_VG_Ma_ar_203:g.81272:m.81272    | 0.40     | 0.38    | NO  | NO  |
|                  | Gene.92884:c25269_g1_i1_VG_Ma_ar_203:g.92884:m.92884    | 0.43     | 0.68    | NO  | NO  |
|                  | Gene.114971:c48537_g1_i1_VG_Ma_ar_203:g.114971:m.114971 | 0.28     | 0.23    | NO  | NO  |
|                  | Gene.23995:c8416_g1_i2_VG_Ma_ar_203:g.23995:m.23995     | 0.57     | 1.27    | NO  | NO  |
|                  | Gene.82895:c15084_g1_i1_VG_Ma_ar_203:g.82895:m.82895    | 0.37     | 0.30    | NO  | NO  |
|                  | Gene.117793:c50956_g1_i1_VG_Ma_ar_203:g.117793:m.117793 | 0.38     | 0.64    | NO  | NO  |
|                  | Gene.119272:c52333_g1_i1_VG_Ma_ar_203:g.119272:m.119272 | 0.50     | 0.57    | NO  | NO  |
|                  | Gene.127058:c60300_g1_i1_VG_Ma_ar_203:g.127058:m.127058 | 0.59     | 1.28    | NO  | NO  |
|                  | Gene.127642:c60904_g1_i1_VG_Ma_ar_203:g.127642:m.127642 | 0.32     | 0.55    | NO  | NO  |
|                  | Gene.89519:c22345_g1_i1_VG_Ma_ar_203:g.89519:m.89519    | 0.67     | 3.25    | NO  | NO  |
|                  | Gene.10145:c5286_g1_i1_VG_Ma_ar_203:g.10145:m.10145     | 0.42     | 0.46    | NO  | NO  |
|                  | Gene.124973:c58410_g1_i1_VG_Ma_ar_203:g.124973:m.124973 | 0.35     | 0.32    | NO  | NO  |
|                  | Gene.125260:c58648_g1_i1_VG_Ma_ar_203:g.125260:m.125260 | 0.27     | 0.20    | NO  | NO  |
|                  | Gene.127264:c60506_g1_i1_VG_Ma_ar_203:g.127264:m.127264 | 0.33     | 0.58    | NO  | NO  |
|                  | Gene.85545:c17639_g1_i1_VG_Ma_ar_203:g.85545:m.85545    | 0.33     | 0.34    | NO  | NO  |
|                  | Gene.94386:c26866_g1_i1_VG_Ma_ar_203:g.94386:m.94386    | 0.28     | 0.13    | NO  | NO  |
|                  | Gene.10147:c5286_g1_i2_VG_Ma_ar_203:g.10147:m.10147     | 0.40     | 0.00    | NO  | NO  |
|                  | Gene.129156:c62487_g1_i1_VG_Ma_ar_203:g.129156:m.129156 | 0.37     | 0.90    | NO  | NO  |
|                  | Gene.85319:c17347_g1_i1_VG_Ma_ar_203:g.85319:m.85319    | 0.25     | 0.16    | NO  | NO  |
|                  | Gene.90725:c23316_g1_i1_VG_Ma_ar_203:g.90725:m.90725    | 0.30     | 0.49    | NO  | NO  |
|                  | Gene.90963:c23496_g1_i1_VG_Ma_ar_203:g.90963:m.90963    | 0.22     | 0.13    | NO  | NO  |
|                  | Gene.94004:c26439_g1_i1_VG_Ma_ar_203:g.94004:m.94004    | 0.33     | 0.31    | NO  | NO  |
|                  | Gene.116568:c49850_g1_i1_VG_Ma_ar_203:g.116568:m.116568 | 0.30     | 0.24    | NO  | NO  |
|                  | Gene.117319:c50511_g1_i1_VG_Ma_ar_203:g.117319:m.117319 | 0.29     | 0.23    | NO  | NO  |
|                  | Gene.128023:c61288_g1_i1_VG_Ma_ar_203:g.128023:m.128023 | 0.28     | 0.22    | NO  | NO  |
|                  | Gene.79698:c12688_g1_i1_VG_Ma_ar_203:g.79698:m.79698    | 0.40     | 1.53    | NO  | NO  |
|                  | Gene.80394:c13162_g1_i1_VG_Ma_ar_203:g.80394:m.80394    | 0.28     | 0.31    | NO  | NO  |
|                  | Gene.100636:c33280_g1_i1_VG_Ma_ar_203:g.100636:m.100636 | 0.36     | 1.14    | NO  | NO  |
|                  | Gene.104598:c37672_g1_i1_VG_Ma_ar_203:g.104598:m.104598 | 0.24     | 0.00    | NO  | NO  |
|                  | Gene.118623:c51716_g1_i1_VG_Ma_ar_203:g.118623:m.118623 | 0.27     | 0.28    | NO  | NO  |
|                  | Gene.119693:c52830_g1_i1_VG_Ma_ar_203:g.119693:m.119693 | 0.26     | 0.26    | NO  | NO  |
|                  | Gene.119868:c53006_g1_i1_VG_Ma_ar_203:g.119868:m.119868 | 0.34     | 0.49    | NO  | NO  |
|                  | Gene.122243:c56194_g1_i1_VG_Ma_ar_203:g.122243:m.122243 | 0.29     | 0.33    | NO  | NO  |
|                  | Gene.81607:c14081_g1_i1_VG_Ma_ar_203:g.81607:m.81607    | 0.34     | 0.86    | NO  | NO  |
|                  | Gene.83981:c16046_g1_i1_VG_Ma_ar_203:g.83981:m.83981    | 0.23     | 0.57    | NO  | NO  |
|                  | Gene.84182:c16242_g1_i1_VG_Ma_ar_203:g.84182:m.84182    | 0.31     | 0.00    | NO  | NO  |
|                  | Gene.95234:c27797_g1_i1_VG_Ma_ar_203:g.95234:m.95234    | 0.25     | 0.00    | NO  | NO  |
|                  | Gene.95765:c28492_g1_i1_VG_Ma_ar_203:g.95765:m.95765    | 0.26     | 0.36    | NO  | NO  |
|                  | Gene.97768:c30999_g1_i1_VG_Ma_ar_203:g.97768:m.97768    | 0.25     | 0.74    | NO  | NO  |
|                  | Gene.98698:c31670_g1_i1_VG_Ma_ar_203:g.98698:m.98698    | 0.32     | 0.72    | NO  | NO  |
|                  | Gene.100200:c32892_g1_i1_VG_Ma_ar_203:g.100200:m.100200 | 0.25     | 0.00    | NO  | NO  |
|                  | Gene.103757:c36570_g1_i1_VG_Ma_ar_203:g.103757:m.103757 | 0.23     | 0.00    | NO  | NO  |
|                  | Gene.109919:c42775_g1_i1_VG_Ma_ar_203:g.109919:m.109919 | 0.38     | 1.13    | NO  | NO  |
|                  | Gene.128811:c62095_g1_i1_VG_Ma_ar_203:g.128811:m.128811 | 0.18     | 0.50    | NO  | NO  |
|                  | Gene.81540:c14028_g1_i1_VG_Ma_ar_203:g.81540:m.81540    | 0.22     | 0.00    | NO  | NO  |
|                  | Gene.85795:c17908_g1_i1_VG_Ma_ar_203:g.85795:m.85795    | 0.21     | 0.81    | NO  | NO  |
|                  | Gene.86524:c18724_g1_i1_VG_Ma_ar_203:g.86524:m.86524    | 0.21     | 1.28    | NO  | NO  |
|                  | Gene.88192:c21109_g1_i1_VG_Ma_ar_203:g.88192:m.88192    | 0.20     | 0.00    | NO  | NO  |
|                  | Gene.89496:c22320_g1_i1_VG_Ma_ar_203:g.89496:m.89496    | 0.20     | 1.49    | NO  | NO  |
|                  | Gene.92122:c24551_g1_i1_VG_Ma_ar_203:g.92122:m.92122    | 0.22     | 0.47    | NO  | NO  |
|                  | Gene.93718:c26142_g1_i1_VG_Ma_ar_203:g.93718:m.93718    | 0.25     | 0.64    | NO  | NO  |
|                  | Gene.101065:c33690_g1_i1_VG_Ma_ar_203:g.101065:m.101065 | 0.24     | 0.57    | NO  | NO  |
|                  | Gene.6747:c4040_g1_i1_VG_Ma_ar_203:g.6747:m.6747        | 0.28     | 2.68    | NO  | NO  |
|                  | Gene.114083:c47904_g1_i1_VG_Ma_ar_203:g.114083:m.114083 | 0.22     | 0.45    | NO  | NO  |
|                  | Gene.121360:c54863_g1_i1_VG_Ma_ar_203:g.121360:m.121360 | 0.21     | 0.81    | NO  | NO  |
|                  | Gene.127033:c60277_g1_i1_VG_Ma_ar_203:g.127033:m.127033 | 0.18     | 0.30    | NO  | NO  |
|                  | Gene.82482:c14760_g1_i1_VG_Ma_ar_203:g.82482:m.82482    | 0.19     | 1.44    | NO  | NO  |
|                  | Gene.88238:c21245_g1_i1_VG_Ma_ar_203:g.88238:m.88238    | 0.22     | 0.00    | NO  | NO  |
|                  | Gene.90479:c23111_g1_i1_VG_Ma_ar_203:g.90479:m.90479    | 0.19     | 0.64    | NO  | NO  |
|                  | Gene.91730:c24177_g1_i1_VG_Ma_ar_203:g.91730:m.91730    | 0.17     | 0.47    | NO  | NO  |
|                  | Gene.96477:c29502_g1_i1_VG_Ma_ar_203:g.96477:m.96477    | 0.22     | 1.97    | NO  | NO  |
|                  | Gene.98130:c31261_g1_i1_VG_Ma_ar_203:g.98130:m.98130    | 0.19     | 1.44    | NO  | NO  |
|                  | Gene.99927:c32658_g1_i1_VG_Ma_ar_203:g.99927:m.99927    | 0.19     | 2.04    | NO  | NO  |
|                  | Gene.104939:c38178_g1_i1_VG_Ma_ar_203:g.104939:m.104939 | 0.22     | 0.00    | NO  | NO  |
|                  | Gene.112721:c45833_g1_i1_VG_Ma_ar_203:g.112721:m.112721 | 0.23     | 0.00    | NO  | NO  |
|                  | Gene.112810:c45948_g1_i1_VG_Ma_ar_203:g.112810:m.112810 | 0.22     | 1.05    | NO  | NO  |
|                  | Gene.113872:c47717_g1_i1_VG_Ma_ar_203:g.113872:m.113872 | 0.19     | 0.68    | NO  | NO  |
|                  | Gene.114903:c48480_g1_i1_VG_Ma_ar_203:g.114903:m.114903 | 0.14     | 0.30    | NO  | NO  |
|                  | Gene.119340:c52418_g1_i1_VG_Ma_ar_203:g.119340:m.119340 | 0.21     | 0.00    | NO  | NO  |
|                  | Gene.85145:c17162_g1_i1_VG_Ma_ar_203:g.85145:m.85145    | 0.13     | 1.44    | NO  | NO  |
|                  | Gene.89608:c22421_g1_i1_VG_Ma_ar_203:g.89608:m.89608    | 0.16     | 0.00    | NO  | NO  |
|                  | Gene.101242:c33866_g1_i1_VG_Ma_ar_203:g.101242:m.101242 | 0.15     | 0.00    | NO  | NO  |
|                  | Gene.107595:c40730_g1_i1_VG_Ma_ar_203:g.107595:m.107595 | 0.12     | 0.00    | NO  | NO  |
|                  | Gene.116541:c49827_g1_i1_VG_Ma_ar_203:g.116541:m.116541 | 0.12     | 0.61    | NO  | NO  |
| Phospholipase A2 | Gene.22371:c8182_g2_i1_VG_Ma_ar_203:g.22371:m.22371     | 2615.27  | 1738.45 | YES | YES |
|                  | Gene.25984:c8719_g1_i2_VG_Ma_ar_203:g.25984:m.25984     | 10.47    | 5.93    | NO  | NO  |
|                  | Gene.25982:c8719_g1_i1_VG_Ma_ar_203:g.25982:m.25982     | 9.67     | 5.41    | NO  | NO  |
|                  | Gene.23736:c8388_g1_i2_VG_Ma_ar_203:g.23736:m.23736     | 3.42     | 1.80    | YES | NO  |
|                  | Gene.1785:c1013_g1_i1_VG_Ma_ar_203:g.1785:m.1785        | 2.10     | 1.32    | NO  | NO  |
|                  | Gene.22370:c8182_g2_i1_VG_Ma_ar_203:g.22370:m.22370     | 1.81     | 1.38    | YES | NO  |
|                  | Gene.111469:c44364_g1_i1_VG_Ma_ar_203:g.111469:m.111469 | 0.37     | 0.64    | NO  | NO  |
| Pimplin          | Gene.6389:c3792_g1_i1_VG_Ma_ar_203:g.6389:m.6389        | 0.72     | 0.24    | NO  | NO  |
| Serpin           | Gene.39303:c10250_g1_i1_VG_Ma_ar_203:g.39303:m.39303    | 12293.05 | 6538.48 | YES | NO  |
|                  | Gene.23038:c8283_g1_i1_VG_Ma_ar_203:g.23038:m.23038     | 265.44   | 112.04  | YES | NO  |
|                  | Gene.23042:c8283_g1_i2_VG_Ma_ar_203:g.23042:m.23042     | 255.92   | 26.67   | YES | NO  |

|                             |                                                          |         |         |     |     |                   |
|-----------------------------|----------------------------------------------------------|---------|---------|-----|-----|-------------------|
|                             | Gene.18821::c7540_g1_i1_VG_Ma_ar_203:g.18821:m.18821     | 154.52  | 82.76   | YES | NO  |                   |
|                             | Gene.88604::c21663_g1_i1_VG_Ma_ar_203:g.88604:m.88604    | 1046.99 | 5398.06 | NO  | NO  |                   |
|                             | Gene.39631::c10286_g1_i1_VG_Ma_ar_203:g.39631:m.39631    | 50.23   | 25.82   | YES | NO  |                   |
|                             | Gene.36691::c10004_g1_i2_VG_Ma_ar_203:g.36691:m.36691    | 33.09   | 15.63   | NO  | NO  |                   |
|                             | Gene.36685::c10004_g1_i1_VG_Ma_ar_203:g.36685:m.36685    | 32.48   | 2.24    | YES | NO  |                   |
|                             | Gene.36698::c10004_g1_i3_VG_Ma_ar_203:g.36698:m.36698    | 31.26   | 0.38    | NO  | NO  |                   |
|                             | Gene.25783::c8691_g1_i2_VG_Ma_ar_203:g.25783:m.25783     | 8.73    | 4.38    | YES | NO  |                   |
|                             | Gene.25787::c8691_g1_i3_VG_Ma_ar_203:g.25787:m.25787     | 8.60    | 0.34    | YES | NO  |                   |
|                             | Gene.28746::c9089_g1_i2_VG_Ma_ar_203:g.28746:m.28746     | 2.41    | 1.34    | YES | NO  |                   |
|                             | Gene.41224::c10441_g1_i1_VG_Ma_ar_203:g.41224:m.41224    | 4.10    | 2.28    | YES | NO  |                   |
|                             | Gene.18923::c7561_g1_i1_VG_Ma_ar_203:g.18923:m.18923     | 26.97   | 52.57   | NO  | NO  |                   |
|                             | Gene.16482::c7092_g1_i1_VG_Ma_ar_203:g.16482:m.16482     | 3.49    | 1.90    | YES | NO  |                   |
|                             | Gene.49092::c11076_g1_i2_VG_Ma_ar_203:g.49092:m.49092    | 3.15    | 1.98    | YES | NO  |                   |
|                             | Gene.41230::c10441_g1_i2_VG_Ma_ar_203:g.41230:m.41230    | 3.34    | 1.44    | NO  | NO  |                   |
|                             | Gene.94719::c27227_g1_i1_VG_Ma_ar_203:g.94719:m.94719    | 10.66   | 9.83    | NO  | NO  |                   |
|                             | Gene.87312::c19725_g1_i1_VG_Ma_ar_203:g.87312:m.87312    | 10.90   | 8.61    | NO  | NO  |                   |
|                             | Gene.8468::c4703_g2_i1_VG_Ma_ar_203:g.8468:m.8468        | 1.36    | 0.48    | NO  | NO  |                   |
|                             | Gene.100456::c33123_g1_i1_VG_Ma_ar_203:g.100456:m.100456 | 9.71    | 4.53    | NO  | NO  |                   |
|                             | Gene.25790::c8691_g1_i4_VG_Ma_ar_203:g.25790:m.25790     | 6.18    | 1.07    | NO  | NO  |                   |
|                             | Gene.117760::c50918_g1_i1_VG_Ma_ar_203:g.117760:m.117760 | 6.13    | 29.83   | NO  | NO  |                   |
|                             | Gene.7457::c4377_g1_i1_VG_Ma_ar_203:g.7457:m.7457        | 0.74    | 0.48    | NO  | NO  |                   |
|                             | Gene.114524::c48202_g1_i1_VG_Ma_ar_203:g.114524:m.114524 | 4.12    | 2.06    | NO  | NO  |                   |
|                             | Gene.15331::c6833_g1_i2_VG_Ma_ar_203:g.15331:m.15331     | 4.29    | 10.83   | NO  | NO  |                   |
|                             | Gene.18925::c7561_g1_i2_VG_Ma_ar_203:g.18925:m.18925     | 3.50    | 5.42    | NO  | NO  |                   |
|                             | Gene.11985::c5955_g1_i1_VG_Ma_ar_203:g.11985:m.11985     | 1.99    | 0.42    | NO  | NO  |                   |
|                             | Gene.11987::c5955_g1_i2_VG_Ma_ar_203:g.11987:m.11987     | 2.35    | 5.24    | NO  | NO  |                   |
|                             | Gene.108067::c41091_g1_i1_VG_Ma_ar_203:g.108067:m.108067 | 0.61    | 0.30    | NO  | NO  |                   |
|                             | Gene.124771::c58257_g1_i1_VG_Ma_ar_203:g.124771:m.124771 | 0.45    | 0.26    | NO  | NO  |                   |
|                             | Gene.2018::c1155_g1_i2_VG_Ma_ar_203:g.2018:m.2018        | 0.60    | 0.43    | NO  | NO  |                   |
|                             | Gene.2916::c1661_g1_i1_VG_Ma_ar_203:g.2916:m.2916        | 2.47    | 4.07    | NO  | NO  |                   |
|                             | Gene.2917::c1661_g1_i2_VG_Ma_ar_203:g.2917:m.2917        | 2.47    | 4.07    | NO  | NO  |                   |
|                             | Gene.2019::c1155_g2_i1_VG_Ma_ar_203:g.2019:m.2019        | 0.81    | 0.48    | NO  | NO  |                   |
|                             | Gene.96020::c28833_g1_i1_VG_Ma_ar_203:g.96020:m.96020    | 2.04    | 1.63    | NO  | NO  |                   |
|                             | Gene.12363::c6050_g1_i1_VG_Ma_ar_203:g.12363:m.12363     | 0.85    | 1.05    | NO  | NO  |                   |
|                             | Gene.123904::c57601_g1_i1_VG_Ma_ar_203:g.123904:m.123904 | 1.77    | 6.78    | NO  | NO  |                   |
|                             | Gene.15332::c6833_g1_i3_VG_Ma_ar_203:g.15332:m.15332     | 1.33    | 5.43    | NO  | NO  |                   |
|                             | Gene.4413::c2527_g1_i1_VG_Ma_ar_203:g.4413:m.4413        | 1.24    | 3.21    | NO  | NO  |                   |
|                             | Gene.4415::c2527_g1_i2_VG_Ma_ar_203:g.4415:m.4415        | 1.24    | 3.21    | NO  | NO  |                   |
|                             | Gene.110485::c43311_g1_i1_VG_Ma_ar_203:g.110485:m.110485 | 0.49    | 0.24    | NO  | NO  |                   |
|                             | Gene.124519::c58058_g1_i1_VG_Ma_ar_203:g.124519:m.124519 | 0.63    | 0.64    | NO  | NO  |                   |
|                             | Gene.81525::c14017_g1_i1_VG_Ma_ar_203:g.81525:m.81525    | 0.43    | 0.38    | NO  | NO  |                   |
|                             | Gene.129254::c62591_g1_i1_VG_Ma_ar_203:g.129254:m.129254 | 0.39    | 0.41    | NO  | NO  |                   |
|                             | Gene.6478::c3845_g1_i1_VG_Ma_ar_203:g.6478:m.6478        | 0.84    | 2.89    | NO  | NO  |                   |
|                             | Gene.858::c465_g1_i1_VG_Ma_ar_203:g.858:m.858            | 0.81    | 1.93    | NO  | NO  |                   |
|                             | Gene.860::c465_g1_i2_VG_Ma_ar_203:g.860:m.860            | 0.62    | 0.00    | NO  | NO  |                   |
|                             | Gene.104715::c37844_g1_i1_VG_Ma_ar_203:g.104715:m.104715 | 0.32    | 0.56    | NO  | NO  |                   |
|                             | Gene.2017::c1155_g1_i1_VG_Ma_ar_203:g.2017:m.2017        | 0.37    | 0.00    | NO  | NO  |                   |
|                             | Gene.104253::c37223_g1_i1_VG_Ma_ar_203:g.104253:m.104253 | 0.26    | 0.18    | NO  | NO  |                   |
|                             | Gene.111990::c44958_g1_i1_VG_Ma_ar_203:g.111990:m.111990 | 0.42    | 2.28    | NO  | NO  |                   |
|                             | Gene.99484::c32288_g1_i1_VG_Ma_ar_203:g.99484:m.99484    | 0.38    | 3.39    | NO  | NO  |                   |
|                             | Gene.124790::c58277_g1_i1_VG_Ma_ar_203:g.124790:m.124790 | 0.28    | 0.61    | NO  | NO  |                   |
|                             | Gene.36686::c10004_g1_i1_VG_Ma_ar_203:g.36686:m.36686    | 0.26    | 0.41    | NO  | NO  |                   |
|                             | Gene.36692::c10004_g1_i2_VG_Ma_ar_203:g.36692:m.36692    | 0.26    | 0.41    | NO  | NO  |                   |
|                             | Gene.111536::c44438_g1_i1_VG_Ma_ar_203:g.111536:m.111536 | 0.24    | 0.95    | NO  | NO  |                   |
|                             | Gene.12562::c6112_g1_i1_VG_Ma_ar_203:g.12562:m.12562     | 0.36    | 1.97    | NO  | NO  |                   |
|                             | Gene.112407::c45435_g1_i1_VG_Ma_ar_203:g.112407:m.112407 | 0.28    | 0.86    | NO  | NO  |                   |
|                             | Gene.113559::c47092_g1_i1_VG_Ma_ar_203:g.113559:m.113559 | 0.28    | 1.85    | NO  | NO  |                   |
|                             | Gene.130598::c64471_g1_i1_VG_Ma_ar_203:g.130598:m.130598 | 0.25    | 1.36    | NO  | NO  |                   |
|                             | Gene.101633::c34223_g1_i1_VG_Ma_ar_203:g.101633:m.101633 | 0.21    | 0.86    | NO  | NO  |                   |
|                             | Gene.118107::c51243_g1_i1_VG_Ma_ar_203:g.118107:m.118107 | 0.19    | 1.28    | NO  | NO  |                   |
|                             | Gene.82452::c14732_g1_i1_VG_Ma_ar_203:g.82452:m.82452    | 0.15    | 1.05    | NO  | NO  |                   |
| Sphingomyelinase            | Gene.49297::c11093_g3_i1_VG_Ma_ar_203:g.49297:m.49297    | 7.52    | 1.74    | YES | NO  |                   |
|                             | Gene.49308::c11093_g3_i2_VG_Ma_ar_203:g.49308:m.49308    | 7.52    | 1.74    | YES | NO  |                   |
|                             | Gene.19930::c7750_g1_i1_VG_Ma_ar_203:g.19930:m.19930     | 1.94    | 1.11    | YES | NO  |                   |
|                             | Gene.97096::c30520_g1_i1_VG_Ma_ar_203:g.97096:m.97096    | 0.25    | 0.00    | NO  | NO  |                   |
|                             | Gene.80725::c13388_g1_i1_VG_Ma_ar_203:g.80725:m.80725    | 0.17    | 0.00    | NO  | NO  |                   |
|                             | Gene.127133::c60379_g1_i1_VG_Ma_ar_203:g.127133:m.127133 | 0.20    | 1.53    | NO  | NO  |                   |
| SVWC-domain 1 (Asilidin8)   | Gene.10561::c5412_g1_i1_VG_Ma_ar_203:g.10561:m.10561     | 5892.41 | 5055.18 | YES | YES | U-Asilidin8-Mar1a |
|                             | Gene.1996::c1145_g1_i1_VG_Ma_ar_203:g.1996:m.1996        | 5.59    | 5.13    | YES | NO  |                   |
|                             | Gene.6951::c4164_g1_i1_VG_Ma_ar_203:g.6951:m.6951        | 2.13    | 1.62    | YES | NO  |                   |
| SVWC-domain 2 (Asilidin9)   | Gene.19409::c7651_g1_i1_VG_Ma_ar_203:g.19409:m.19409     | 9419.14 | 9288.18 | YES | YES | U-Asilidin9-Mar1a |
|                             | Gene.1624::c925_g1_i1_VG_Ma_ar_203:g.1624:m.1624         | 1.32    | 1.03    | YES | NO  |                   |
| Venom acid phosphatase-like | Gene.47513::c10949_g2_i2_VG_Ma_ar_203:g.47513:m.47513    | 1923.41 | 796.97  | YES | YES |                   |
|                             | Gene.47507::c10949_g2_i1_VG_Ma_ar_203:g.47507:m.47507    | 1026.94 | 479.11  | YES | YES |                   |
|                             | Gene.47502::c10949_g1_i1_VG_Ma_ar_203:g.47502:m.47502    | 26.87   | 12.41   | NO  | NO  |                   |
|                             | Gene.51883::c11286_g1_i1_VG_Ma_ar_203:g.51883:m.51883    | 11.20   | 3.07    | NO  | NO  |                   |
|                             | Gene.51890::c11286_g1_i2_VG_Ma_ar_203:g.51890:m.51890    | 11.20   | 3.07    | NO  | NO  |                   |
|                             | Gene.51898::c11286_g1_i3_VG_Ma_ar_203:g.51898:m.51898    | 10.66   | 0.00    | NO  | NO  |                   |
|                             | Gene.23092::c8291_g1_i1_VG_Ma_ar_203:g.23092:m.23092     | 11.66   | 5.82    | NO  | NO  |                   |
|                             | Gene.57502::c11663_g2_i1_VG_Ma_ar_203:g.57502:m.57502    | 6.18    | 3.20    | YES | NO  |                   |
|                             | Gene.21344::c8010_g1_i1_VG_Ma_ar_203:g.21344:m.21344     | 9.09    | 6.00    | NO  | NO  |                   |
|                             | Gene.5599::c3273_g1_i1_VG_Ma_ar_203:g.5599:m.5599        | 5.38    | 13.57   | NO  | NO  |                   |
